# Supplementary material for: Visible light-promoted aerobic oxidative cleavage and cyclization of olefins to access 3-hydroxy-isoindolinones
Source: Royal Society of Chemistry journal article supplement (doi:10.1039/d1qo01087e), 2021-09-29

## Supporting information

### Visible Light-Promoted Aerobic Oxidative Cleavage and Cyclization of Olefins to Access 3-hydroxy-isoindolinones

Tao Ma,<sup>a</sup> Jiawei Hua,<sup>a</sup> Mixue Bian,<sup>a</sup> Hong Qin,<sup>a</sup> Xinxin Lin,<sup>a</sup> Xiaobing Yang,<sup>b</sup> Chengkou Liu,<sup>a</sup> Zhao Yang,<sup>\*c</sup> Zheng Fang,<sup>\*a,d</sup>  
Kai Guo<sup>a,d</sup>

<sup>a</sup> College of Biotechnology and Pharmaceutical Engineering, Nanjing Tech University, 30 Puzhu Rd S., Nanjing 211816,  
China. E-mail: guok@njtech.edu.cn; Fax: +86 2558139935; Tel: +86 2558139926

<sup>b</sup> Biology and Medicine Department, Jiangsu industrial technology research institute, Nanjing 210031, P.R. China,  
yangxb@jitri.org

<sup>c</sup> College of Engineering, China Pharmaceutical University, 24 Tongjiaxiang, Nanjing 210003, China.

<sup>d</sup> State Key Laboratory of Materials-Oriented Chemical Engineering, Nanjing Tech University, 30 Puzhu Rd S., Nanjing  
211816, China.

## Table of contents

|                                                                                        |    |
|----------------------------------------------------------------------------------------|----|
| 1. General information.....                                                            | 2  |
| 2. Optimization of reaction conditions of 1a .....                                     | 3  |
| 3. Experimental section.....                                                           | 4  |
| 4. X-ray crystallography structure of compound 2n .....                                | 6  |
| 5. HRMS Spectra for compound 3a, 4a, 6a and 7ai .....                                  | 7  |
| 6. Plausible reaction mechanism <i>via</i> diphenyl disulfide or ferric chloride ..... | 8  |
| 7. Analytical data of products 2 .....                                                 | 9  |
| 8. References .....                                                                    | 17 |
| 9. <sup>1</sup> H NMR, <sup>13</sup> C NMR and <sup>19</sup> F NMR spectra.....        | 19 |

## 1. General information

Unless otherwise indicated, all the reagents and solvents were purchased from commercial suppliers and used without any further purification.  $^1\text{H}$  spectra were recorded in  $\text{CDCl}_3$  or (Methyl sulfoxide)- $d_6$  on 400MHz NMR spectrometers and resonances ( $\bullet$ ) are given in parts per million relatives to tetramethylsilane. Data are reported as follows: chemical shift, multiplicity (s = singlet, d = doublet, t = triplet, q = quartet, p = penta, dd = doublet of doublets, dt = doublet of triplets, ddt = doublet of doublet of triplets, dtd = doublet of triplet of doublets, m = multiplet, br = broad), coupling constant ( $J$ ) in Hertz (Hz), and integration.  $^{13}\text{C}$  NMR were recorded at 100 MHz and chemical data for carbons are reported in parts per million (ppm,  $\delta$  scale) downfield from tetramethylsilane and are referenced to the carbon resonance of the solvent. Column chromatography was generally performed on Silicycle silica gel (200-300 mesh). Analytical thin-layer chromatography (TLC) was performed on 0.2 mm coated silica gel plates (HSGF 254) and visualized the course of the reactions using a UV light (254 nm or 365 nm). High-resolution mass spectra (HRMS) were obtained on an Agilent mass spectrometer using ESI-TOF (electrosprayionization-time of flight).

## 2. Optimization of reaction conditions of 1a

**Table S1.** Screening of reaction conditions for the synthesis of product **2a**<sup>a</sup>

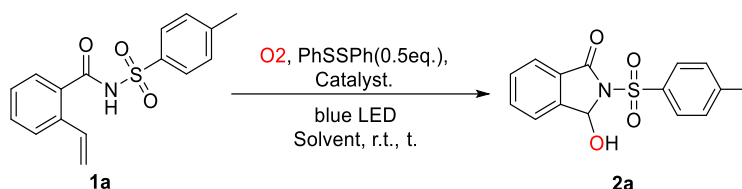

| Entry | Catalyst                             | Solvent                     | T (h) | Yield (%) <sup>b</sup> |
|-------|--------------------------------------|-----------------------------|-------|------------------------|
| 1     | FeCl <sub>3</sub>                    | DCE                         | 10    | 43                     |
| 2     | FeCl <sub>3</sub>                    | DMF                         | 10    | trace                  |
| 3     | FeCl <sub>3</sub>                    | THF                         | 10    | 30                     |
| 4     | FeCl <sub>3</sub>                    | DMSO                        | 10    | trace                  |
| 5     | FeCl <sub>3</sub>                    | MeCN/H <sub>2</sub> O (5/1) | 10    | 25                     |
| 6     | FeCl <sub>3</sub>                    | MeCN/HFIP (5/1)             | 10    | 45                     |
| 7     | ZnCl <sub>2</sub>                    | MeCN/MeOH (5/1)             | 10    | 52                     |
| 8     | NiCl <sub>2</sub>                    | MeCN/MeOH (5/1)             | 10    | 21                     |
| 9     | CuCl <sub>2</sub>                    | MeCN/MeOH (5/1)             | 10    | 21                     |
| 10    | CuCl                                 | MeCN/MeOH (5/1)             | 10    | 33                     |
| 11    | CoCl <sub>2</sub>                    | MeCN/MeOH (5/1)             | 10    | trace                  |
| 12    | Fe(acac) <sub>3</sub>                | MeCN/MeOH (5/1)             | 10    | trace                  |
| 13    | FeSO <sub>4</sub> ·7H <sub>2</sub> O | MeCN/MeOH (5/1)             | 10    | 31                     |
| 14    | FeCl <sub>3</sub>                    | MeCN/MeOH (5/1)             | 2     | 12                     |
| 15    | FeCl <sub>3</sub>                    | MeCN/MeOH (5/1)             | 4     | 38                     |
| 16    | FeCl <sub>3</sub>                    | MeCN/MeOH (5/1)             | 6     | 52                     |
| 17    | FeCl <sub>3</sub>                    | MeCN/MeOH (5/1)             | 8     | 68                     |
| 18    | FeCl <sub>3</sub>                    | MeCN/MeOH (5/1)             | 12    | 75                     |

<sup>a</sup> Reaction conditions: O<sub>2</sub>, blue LED (426 nm, 30 W), **1a** (0.3 mmol, 1.0 eq.), PhSSPh (0.15 mmol, 0.5eq.), catalyst, MeCN/MeOH (3 mL, v/v = 5/1), room temperature, 10 h, pressure cylindrical. <sup>b</sup> Isolated yield.

### 3. Experimental section

#### General procedure for the synthesis of 2-olefin benzoic acid<sup>1</sup>

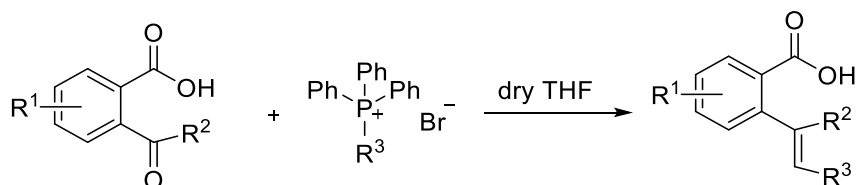

Under nitrogen, to a solution of *t*-BuOK (2.6 equiv.) in dry THF (0.5 M) was added bromo-(alkyl/aryl)-triphenylphosphorane (1.3 equiv.) in portions at 0 °C. The mixture was stirred at 0 °C for 30 min and a solution of ketone (1.0 equiv.) in dry THF (1 M) was added dropwise and the reaction was stirred at 0 °C for 1 h and at rt overnight. The solvent was removed in vacuo and the residue diluted with DCM and aqueous NaOH (1 M). The aqueous layer was separated, washed with dichloromethane, and acidified to pH 1 with concentrated HCl. DCM was added and the organic compound was extracted twice with DCM. The organic layer was washed with water, dried over MgSO<sub>4</sub> and concentrated. The crude product was purified by SiO<sub>2</sub> column chromatography (DCM/MeOH: 100/0 to 95/5 to 9/1) to give pure enoic acid.

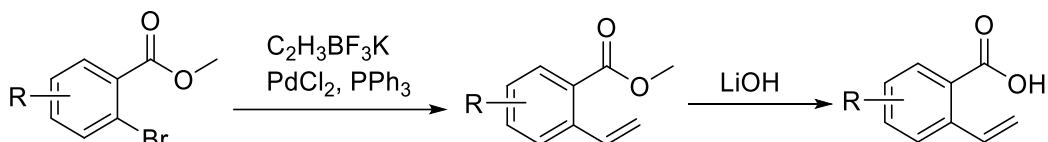

A 50 mL sealable Schlenk tube was charged with methyl 2-bromobenzoate (4.1 mmol), potassium vinyltrifluoroborate (4.4 mmol), cesium carbonate (4.1 g), palladium (II) chloride (29 mg), triphenylphosphine (130 mg), THF (9 mL) and degassed water (1 mL). The reaction mixture was stirred at 85°C for 40 h. After cooling down, the reaction mixture was diluted with DCM (50 mL) and water (30 mL). After the solution was filtered over Celite, the organic layer was separated. The aqueous layer was extracted with DCM (50 mL × 2). The combined organic layers were dried over MgSO<sub>4</sub>, filtered and concentrated in vacuo. The residue was purified by flash chromatography on silica gel (petroleum/EtOAc) to give the compound methyl 2-vinyl benzoate (86%).

To a solution of methyl 2-vinyl benzoate (7.26 mmol) in a mixed solvent (30 mL, volume ratio of THF: MeOH: H<sub>2</sub>O = 4: 1: 1) was added lithium hydroxide (21.8 mmol). The reaction mixture was stirred at 70 °C for 12 h. After cooling down to room temperature, the reaction mixture was adjusted to pH = 1 using 1 M HCl. The mixture was extracted with ethyl acetate (20 mL × 2). The combined organic layers were dried over MgSO<sub>4</sub>, filtered and concentrated in vacuo. The residue was recrystallized from ethanol to give the 2-vinyl benzoic acid (99%).

### General procedure for the synthesis of 2-olefin benzimide<sup>2</sup>

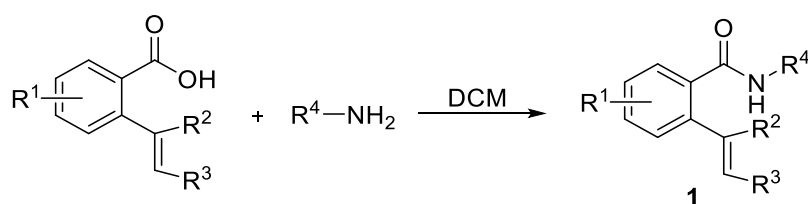

A dichloromethane solution (100 mL) containing 2-vinylbenzoic acid (0.98 g, 6.6 mmol), tosylamine (0.90 g, 5.3 mmol), DMAP (1.61 g, 13.2 mmol), and 1-ethyl-3-(3-dimethylaminopropyl) carbodiimide hydrochloride (EDC·HCl) (2.53 g, 13.2 mmol) was stirred overnight at rt. The reaction mixture was quenched with HCl aq. and extracted with dichloromethane. The organic phase was dried with MgSO<sub>4</sub> and concentrated in vacuo. The crude mixture was purified by column chromatography (SiO<sub>2</sub>, eluent: dichloromethane) to give raw material **1**.

### General procedure for the synthesis of product 2

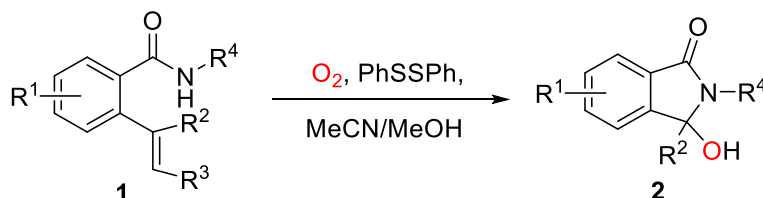

A 35 mL glass tube was charged with **2** (0.3 mmol), PhSSPh (0.15 mmol, 0.5 equiv.), FeCl<sub>3</sub> (0.03 mmol, 0.1 equiv.), MeCN/MeOH (3mL, v/v = 5/1), O<sub>2</sub> and a magnetic stir bar. The reaction mixture was stirred and irradiated by blue LED (426 nm, 30W) at room temperature for 10

hours. After completing reaction, it was monitored with TLC. Then the reaction mixture was washed with saturated  $\text{NH}_4\text{Cl}$  solution and extracted with ethyl DCM. The organic layer was dried with anhydrous sodium sulfate and the solvent was removed under vacuum. The pure product **2** was obtained by flash chromatography on silica gel using DCM and MeOH as the eluent.

### General procedure for the synthesis of product **6a**<sup>3</sup>

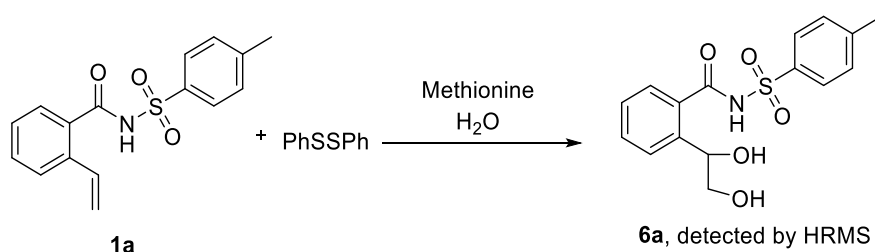

A 35 mL glass tube was charged with **2** (0.3 mmol), PhSSPh (0.15 mmol, 0.5 equiv.),  $\text{FeCl}_3$  (0.03 mmol, 0.1 equiv.), methionine (0.3 mmol, 1 equiv.),  $\text{H}_2\text{O}$  (1mL), MeCN/MeOH (3mL, v/v = 5/1),  $\text{O}_2$  and a magnetic stir bar. The reaction mixture was stirred and irradiated by blue LED (426 nm, 30W) at room temperature for 10 hours. After completing reaction, it was monitored with TLC. The product **6a** was detected *via* high-resolution mass spectroscopy.

### 4. X-ray crystallography structure of compound **2n**

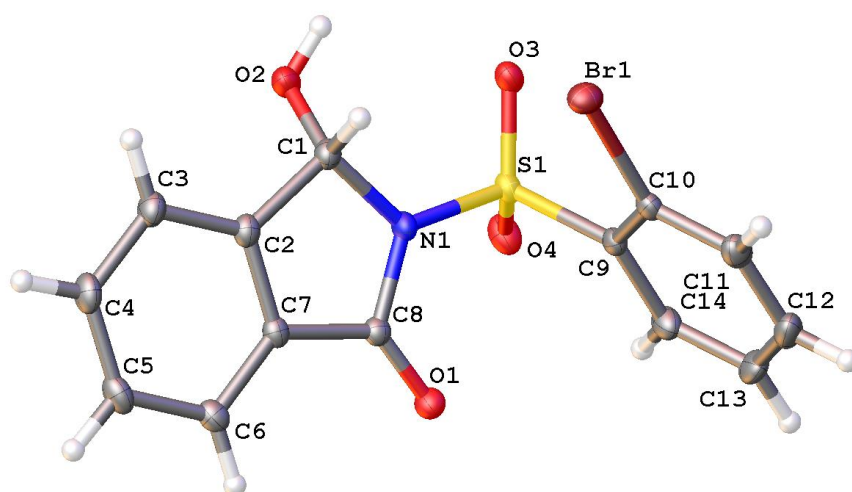

Fig. S1. X-ray structure of **2n**

## 5. HRMS Spectra for compound **3a**, **4a**, **6a** and **7ai**

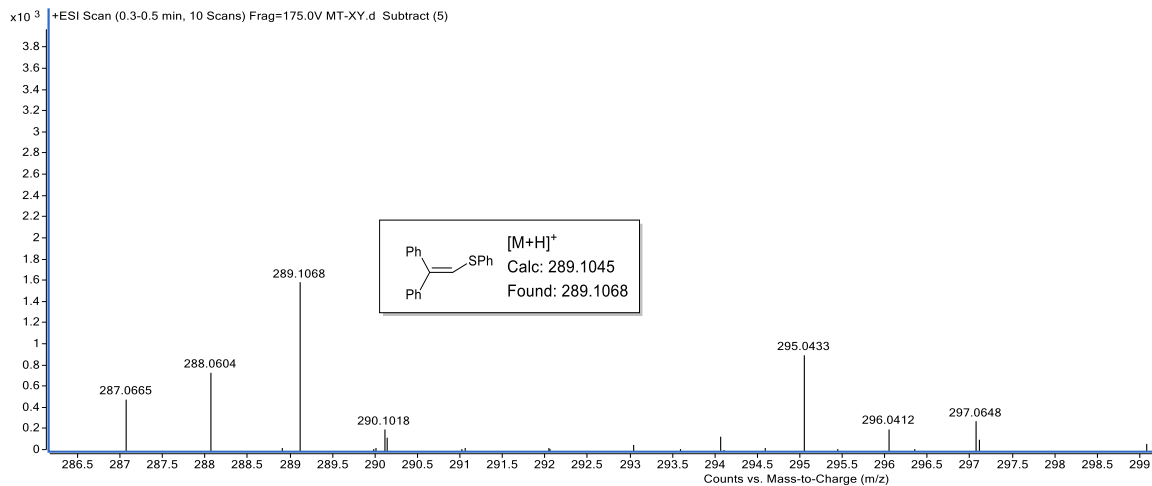

Fig. S2. HRMS Spectra for compound **3a**

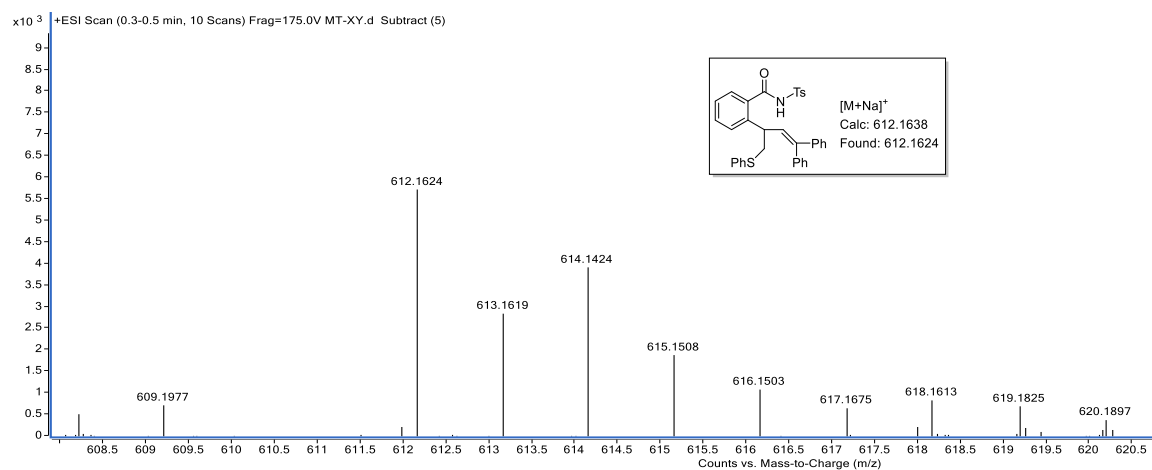

Fig. S2. HRMS Spectra for compound **4a**

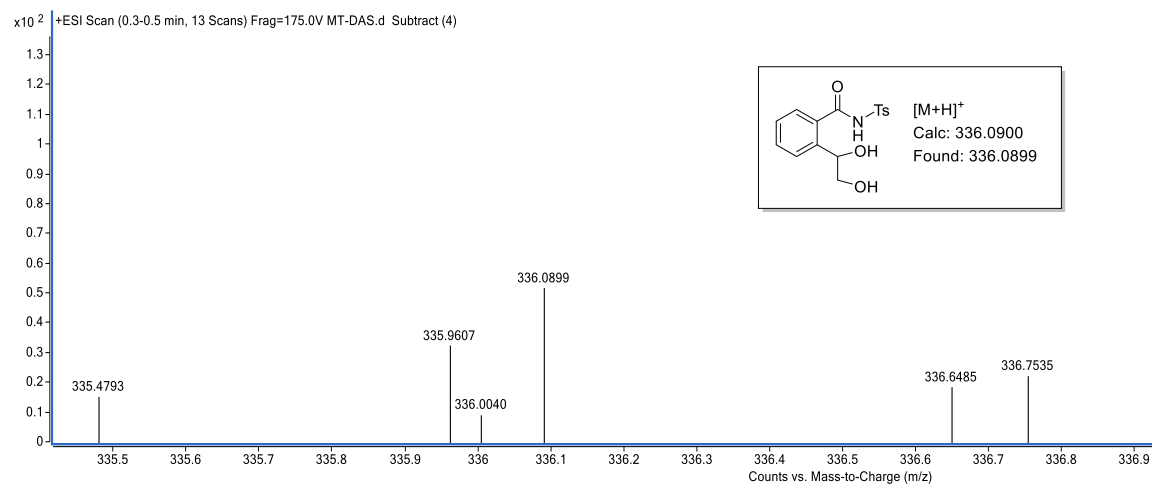

**Fig. S4.** HRMS Spectra for compound **6a**

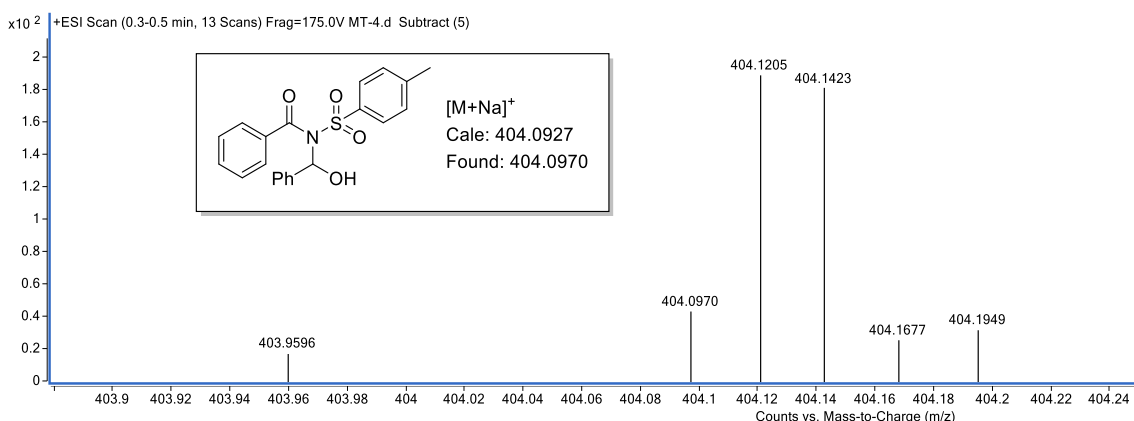

**Fig. S5.** HRMS Spectra for compound **7ai**

## 6. Plausible reaction mechanism *via* diphenyl disulfide or ferric chloride

Based on the experimental results and previous reports<sup>4</sup>, another plausible mechanism was speculated *via* diphenyl disulfide or ferric chloride in scheme S1. Similarly, diphenyl disulfide was split into two molecules of phenyl sulfide radical **A** and free radical intermediate **B** is formed through radicals **A** attacks unsaturated double bond of substrate **1a** in high regioselectivity. Then, intermediate **C** is gotten when molecular oxygen capture radical **B**, and afterwards, the key intermediate **D** would be formed *via* C-S bond cleavage. Next, unstable intermediate **D** could give desired product **2a** through the fracture of dioxetane immediately (Scheme S1, Path A). On the other hand, iron salt could combine with C=C bond and generate intermediate **G** with the participation of oxygen. Subsequently, unstable intermediate **D** proceeds through removal of iron salt, which gives goal product isoindolinone **2a** at same way as path A (Scheme S1, Path B).



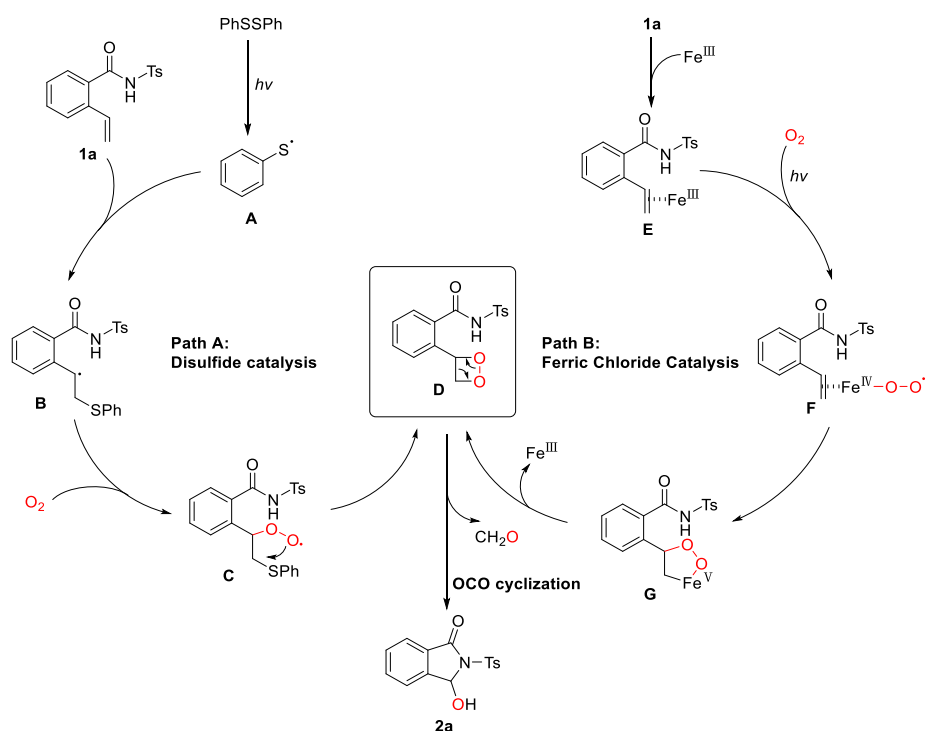

**Scheme S1.** Plausible reaction mechanism *via* diphenyl disulfide or ferric chloride

## 7. Analytical data of products 2

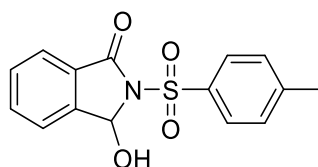

3-hydroxy-2-tosylisoindolin-1-one (**2a**). White solid (75%, 0.068g).  $^1\text{H}$  NMR (400 MHz, Chloroform-*d*)  $\delta$  7.95 (s, 2H), 7.68 (d,  $J$  = 7.6 Hz, 1H), 7.61 (td,  $J$  = 7.5, 1.0 Hz, 1H), 7.56 (d,  $J$  = 7.3 Hz, 1H), 7.49 - 7.42 (m, 1H), 7.26 (d,  $J$  = 8.3 Hz, 2H), 6.58 (d,  $J$  = 4.9 Hz, 1H), 4.47 (d,  $J$  = 5.0 Hz, 1H), 2.34 (s, 3H).  $^{13}\text{C}$  NMR (101 MHz, Chloroform-*d*)  $\delta$  164.79, 145.44, 142.51, 135.50, 134.56, 130.63, 129.76, 129.21, 128.35, 124.66, 124.24, 82.48, 21.71. HRMS (TOF)  $m/z$  [ $\text{M} + \text{H}$ ] $^+$  Calcd for  $\text{C}_{15}\text{H}_{14}\text{NO}_4\text{S}^+$  304.0638 found 304.0635.

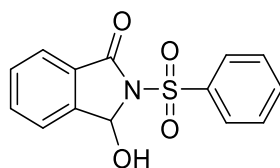

3-hydroxy-2-(phenylsulfonyl)isoindolin-1-one (**2b**). White solid (78%, 0.068g).  $^1\text{H}$  NMR (400 MHz, Chloroform-*d*)  $\delta$  8.09 (dt,  $J$  = 8.6, 1.7 Hz, 2H), 7.70 (d,  $J$  = 7.6 Hz, 1H), 7.63 (td,  $J$  = 7.5, 1.1

Hz, 1H), 7.60 – 7.54 (m, 2H), 7.52 - 7.44 (m, 3H), 6.60 (d,  $J = 4.9$  Hz, 1H), 4.31 (d,  $J = 5.0$  Hz, 1H).  $^{13}\text{C}$  NMR (101 MHz, Chloroform- $d$ )  $\delta$  163.66, 141.37, 137.40, 133.60, 133.21, 129.68, 128.11, 127.24, 123.69, 123.23, 81.44. HRMS (TOF)  $m/z$   $[\text{M} + \text{H}]^+$  Calcd for  $\text{C}_{14}\text{H}_{12}\text{NO}_4\text{S}^+$  290.0482 found 290.0479.

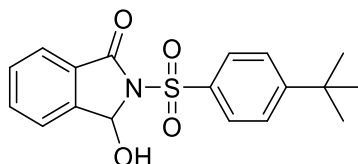

2-((4-(tert-butyl)phenyl)sulfonyl)-3-hydroxyisoindolin-1-one (**2c**). White solid (80%, 0.083g).  $^1\text{H}$  NMR (400 MHz, DMSO- $d_6$ )  $\delta$  8.06 - 8.02 (m, 2H), 7.78 (td,  $J = 7.5, 1.1$  Hz, 1H), 7.73 - 7.66 (m, 4H), 7.65 (d,  $J = 2.3$  Hz, 1H), 7.62 - 7.57 (m, 1H), 6.73 (s, 1H), 1.29 (s, 9H).  $^{13}\text{C}$  NMR (101 MHz, DMSO- $d_6$ )  $\delta$  165.18, 157.66, 145.33, 136.81, 135.20, 130.71, 128.74, 128.17, 126.52, 125.00, 124.16, 83.80, 35.47, 31.16. HRMS (TOF)  $m/z$   $[\text{M} + \text{H}]^+$  Calcd for  $\text{C}_{18}\text{H}_{20}\text{NO}_4\text{S}^+$  346.1108 found 346.1122.

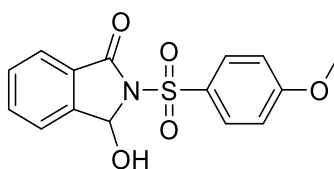

3-hydroxy-2-((4-methoxyphenyl)sulfonyl)isoindolin-1-one (**2d**). White solid (65%, 0.062g).  $^1\text{H}$  NMR (400 MHz, DMSO- $d_6$ )  $\delta$  8.01 (d,  $J = 8.9$  Hz, 2H), 7.77 (t,  $J = 7.5$  Hz, 1H), 7.69 (d,  $J = 7.5$  Hz, 1H), 7.65 (s, 1H), 7.62 (d,  $J = 7.9$  Hz, 1H), 7.58 (d,  $J = 7.5$  Hz, 1H), 7.15 (d,  $J = 9.0$  Hz, 2H), 6.68 (s, 1H), 3.85 (s, 3H).  $^{13}\text{C}$  NMR (101 MHz, DMSO- $d_6$ )  $\delta$  165.13, 163.90, 145.32, 135.15, 131.05, 130.70, 130.66, 128.78, 124.98, 124.11, 114.77, 83.72, 56.30. HRMS (TOF)  $m/z$   $[\text{M} + \text{H}]^+$  Calcd for  $\text{C}_{15}\text{H}_{14}\text{NO}_5\text{S}^+$  320.0587 found 320.0592.

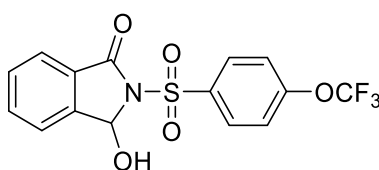

3-hydroxy-2-((4-(trifluoromethoxy)phenyl)sulfonyl)isoindolin-1-one (**2e**). Colorless solid (72%, 0.081g).  $^1\text{H}$  NMR (400 MHz, Chloroform- $d$ )  $\delta$  8.24 – 8.10 (m, 2H), 7.71 (d,  $J = 7.6$  Hz, 1H), 7.65 (td,  $J = 7.5, 1.1$  Hz, 1H), 7.58 (d,  $J = 7.4$  Hz, 1H), 7.53 - 7.46 (m, 1H), 7.37 – 7.24 (m, 2H), 6.61 (d,  $J = 5.3$  Hz, 1H), 4.30 (d,  $J = 5.3$  Hz, 1H).  $^{13}\text{C}$  NMR (101 MHz, Chloroform- $d$ )  $\delta$  163.70, 152.25, 141.38, 135.52, 133.79, 129.81, 129.68, 127.90, 123.76, 123.28, 119.71, 119.13 (q,  $J = 259$  Hz), 81.53.  $^{19}\text{F}$  NMR (376 MHz, Chloroform- $d$ )  $\delta$  -57.63 (s, 3F). HRMS (TOF)  $m/z$   $[\text{M} + \text{H}]^+$  Calcd for  $\text{C}_{15}\text{H}_{11}\text{NO}_5\text{F}_3\text{S}^+$  374.0305 found 374.0326.

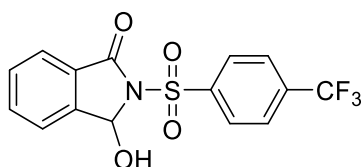

3-hydroxy-2-((4-(trifluoromethyl)phenyl)sulfonyl)isoindolin-1-one (**2f**). White solid (85%, 0.091g).  $^1\text{H}$  NMR (400 MHz,  $\text{DMSO-}d_6$ )  $\delta$  8.36 (d,  $J$  = 8.3 Hz, 2H), 8.09 (d,  $J$  = 8.4 Hz, 2H), 7.83 (t,  $J$  = 7.5 Hz, 1H), 7.79 - 7.67 (m, 3H), 7.64 (t,  $J$  = 7.5 Hz, 1H), 6.81 (s, 1H).  $^{13}\text{C}$  NMR (101 MHz,  $\text{DMSO-}d_6$ )  $\delta$  165.24, 145.39, 143.37, 135.42, 134.01 (q,  $J$  = 32 Hz), 130.79, 129.27, 128.43, 126.91, 125.02, 124.32, 123.78 (q,  $J$  = 271 Hz), 84.18.  $^{19}\text{F}$  NMR (376 MHz,  $\text{DMSO-}d_6$ )  $\delta$  -61.87 (s, 3F). HRMS (TOF)  $m/z$   $[\text{M} + \text{H}]^+$  Calcd for  $\text{C}_{15}\text{H}_{11}\text{NO}_4\text{F}_3\text{S}^+$  358.0355 found 358.0381.

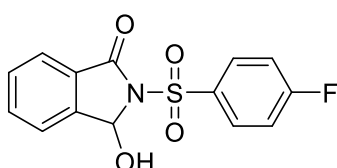

2-((4-fluorophenyl)sulfonyl)-3-hydroxyisoindolin-1-one (**2g**). White solid (72%, 0.066g).  $^1\text{H}$  NMR (400 MHz, Chloroform- $d$ )  $\delta$  8.12 (dd,  $J$  = 8.8, 5.0 Hz, 2H), 7.71 (d,  $J$  = 7.6 Hz, 1H), 7.65 (t,  $J$  = 7.5 Hz, 1H), 7.58 (d,  $J$  = 7.5 Hz, 1H), 7.49 (t,  $J$  = 7.4 Hz, 1H), 7.15 (t,  $J$  = 8.5 Hz, 2H), 6.60 (s, 1H), 4.31 (s, 1H).  $^{13}\text{C}$  NMR (101 MHz, Chloroform- $d$ )  $\delta$  166.30, 163.72 (d,  $J$  = 4 Hz), 141.34, 133.71, 133.36 (d,  $J$  = 3 Hz), 130.32 (d,  $J$  = 10 Hz), 129.77, 127.97, 123.71, 123.25, 115.44 (d,  $J$  = 22 Hz), 81.46.  $^{19}\text{F}$  NMR (376 MHz, Chloroform- $d$ )  $\delta$  -102.22 (s, 1F). HRMS (TOF)  $m/z$   $[\text{M} + \text{H}]^+$  Calcd for  $\text{C}_{14}\text{H}_{11}\text{NO}_4\text{FS}^+$  308.0387 found 308.0396.

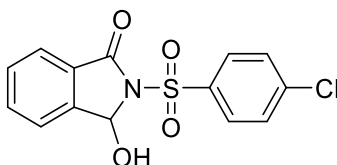

2-((4-chlorophenyl)sulfonyl)-3-hydroxyisoindolin-1-one (**2h**). White solid (82%, 0.080g).  $^1\text{H}$  NMR (400 MHz,  $\text{DMSO-}d_6$ )  $\delta$  8.11 (d,  $J$  = 8.7 Hz, 2H), 7.80 (t,  $J$  = 7.5 Hz, 1H), 7.76 (s, 1H), 7.73 (d,  $J$  = 8.0 Hz, 2H), 7.68 (s, 1H), 7.67 (s, 1H), 7.62 (t,  $J$  = 7.5 Hz, 1H), 6.74 (s, 1H).  $^{13}\text{C}$  NMR (101 MHz,  $\text{DMSO-}d_6$ )  $\delta$  165.20, 145.37, 139.59, 138.42, 135.35, 130.78, 130.19, 129.83, 128.53, 125.01, 124.26, 84.02. HRMS (TOF)  $m/z$   $[\text{M} + \text{H}]^+$  Calcd for  $\text{C}_{14}\text{H}_{11}\text{NO}_4\text{ClS}^+$  324.0092 found 324.0088.

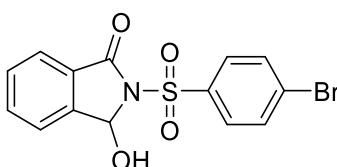

2-((4-bromophenyl)sulfonyl)-3-hydroxyisoindolin-1-one (**2i**). White solid (88%, 0.097g).  $^1\text{H}$  NMR (400 MHz,  $\text{DMSO-}d_6$ )  $\delta$  8.07 (d,  $J$  = 8.6 Hz, 2H), 7.91 (d,  $J$  = 8.5 Hz, 2H), 7.83 - 7.78 (m, 1H), 7.75 (d,  $J$  = 7.5 Hz, 1H), 7.69 (d,  $J$  = 7.6 Hz, 1H), 7.62 (t,  $J$  = 7.5 Hz, 1H), 7.55 (s, 1H), 6.77 (s, 1H).

$^{13}\text{C}$  NMR (101 MHz, DMSO- $d_6$ )  $\delta$  165.21, 145.35, 138.85, 135.33, 132.78, 130.77, 130.24, 128.74, 128.55, 125.00, 124.27, 84.04. HRMS (TOF)  $m/z$   $[\text{M} + \text{H}]^+$  Calcd for  $\text{C}_{14}\text{H}_{11}\text{NO}_4\text{BrS}^+$  367.9587 found 367.9596.

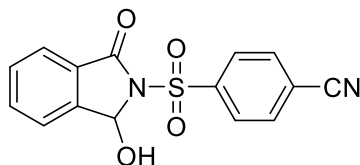

4-((1-hydroxy-3-oxoisindolin-2-yl)sulfonyl)benzonitrile (**2j**). White solid (80%, 0.075g).  $^1\text{H}$  NMR (400 MHz, DMSO- $d_6$ )  $\delta$  8.29 (d,  $J = 8.4$  Hz, 2H), 8.18 (s, 2H), 7.83 (t,  $J = 7.5$  Hz, 1H), 7.73 (dd,  $J = 21.5, 7.6$  Hz, 3H), 7.64 (t,  $J = 7.5$  Hz, 1H), 6.80 (s, 1H).  $^{13}\text{C}$  NMR (101 MHz, DMSO- $d_6$ )  $\delta$  165.26, 145.39, 143.39, 135.50, 133.85, 130.84, 128.95, 128.34, 125.03, 124.37, 118.00, 116.86, 84.22. HRMS (TOF)  $m/z$   $[\text{M} + \text{H}]^+$  Calcd for  $\text{C}_{15}\text{H}_{11}\text{N}_2\text{O}_4\text{S}^+$  315.0434 found 315.0420.

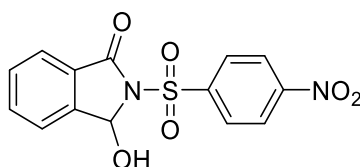

3-hydroxy-2-((4-nitrophenyl)sulfonyl)isindolin-1-one (**2k**). White solid (71%, 0.071g).  $^1\text{H}$  NMR (400 MHz, DMSO- $d_6$ )  $\delta$  8.49 (d,  $J = 8.8$  Hz, 2H), 8.37 (d,  $J = 8.7$  Hz, 2H), 7.83 (t,  $J = 7.5$  Hz, 1H), 7.80 - 7.72 (m, 2H), 7.70 (d,  $J = 7.6$  Hz, 1H), 7.64 (t,  $J = 7.5$  Hz, 1H), 6.80 (d,  $J = 8.5$  Hz, 1H).  $^{13}\text{C}$  NMR (101 MHz, DMSO- $d_6$ )  $\delta$  165.25, 150.99, 145.41, 144.67, 135.53, 130.85, 129.93, 128.32, 125.04, 124.97, 124.38, 84.27. HRMS (TOF)  $m/z$   $[\text{M} + \text{H}]^+$  Calcd for  $\text{C}_{14}\text{H}_{11}\text{N}_2\text{O}_6\text{S}^+$  335.0332 found 335.0350.

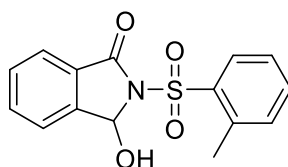

3-hydroxy-2-(o-tolylsulfonyl)isindolin-1-one (**2l**). White solid (71%, 0.071g). White solid (68%, 0.062g).  $^1\text{H}$  NMR (400 MHz, DMSO- $d_6$ )  $\delta$  8.10 (d,  $J = 7.9$  Hz, 1H), 7.80 (t,  $J = 7.5$  Hz, 1H), 7.74 - 7.66 (m, 3H), 7.65 - 7.56 (m, 2H), 7.51 - 7.38 (m, 2H), 6.74 (d,  $J = 9.3$  Hz, 1H), 2.61 (s, 3H).  $^{13}\text{C}$  NMR (101 MHz, DMSO- $d_6$ )  $\delta$  165.39, 145.27, 138.00, 137.82, 135.33, 134.38, 133.03, 130.82, 130.75, 128.52, 126.97, 125.11, 124.26, 83.98, 20.26. HRMS (TOF)  $m/z$   $[\text{M} + \text{H}]^+$  Calcd for  $\text{C}_{15}\text{H}_{14}\text{NO}_4\text{S}^+$  304.0638 found 304.0630.

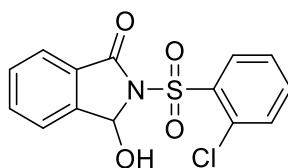

2-((2-chlorophenyl)sulfonyl)-3-hydroxyisindolin-1-one (**2m**). White solid (66%, 0.064g).  $^1\text{H}$

NMR (400 MHz, DMSO- $d_6$ )  $\delta$  8.26 (d,  $J = 7.8$  Hz, 1H), 7.84 (t,  $J = 7.5$  Hz, 1H), 7.77 - 7.71 (m, 3H), 7.70 (s, 1H), 7.68 (s, 1H), 7.66 (s, 1H), 7.65 - 7.60 (m, 1H), 6.82 (s, 1H).  $^{13}\text{C}$  NMR (101 MHz, DMSO- $d_6$ )  $\delta$  165.03, 145.24, 136.50, 136.04, 135.55, 133.07, 132.28, 131.17, 130.88, 128.36, 128.08, 125.17, 124.36, 85.06. HRMS (TOF)  $m/z$   $[\text{M} + \text{H}]^+$  Calcd for  $\text{C}_{14}\text{H}_{11}\text{NO}_4\text{ClS}^+$  324.0092 found 324.0098.

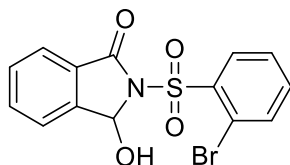

2-((2-bromophenyl)sulfonyl)-3-hydroxyisoindolin-1-one (**2n**). Colorless solid (70%, 0.077g).  $^1\text{H}$  NMR (400 MHz, DMSO- $d_6$ )  $\delta$  8.30 - 8.22 (m, 1H), 7.87 - 7.77 (m, 3H), 7.73 - 7.67 (m, 3H), 7.66 - 7.59 (m, 2H), 6.84 (d,  $J = 9.5$  Hz, 1H).  $^{13}\text{C}$  NMR (101 MHz, DMSO- $d_6$ )  $\delta$  164.96, 145.18, 138.13, 135.95, 135.73, 135.56, 133.41, 130.89, 128.81, 128.10, 125.15, 124.35, 119.75, 85.45. HRMS (TOF)  $m/z$   $[\text{M} + \text{H}]^+$  Calcd for  $\text{C}_{14}\text{H}_{11}\text{NO}_4\text{BrS}^+$  367.9587 found 367.9599.

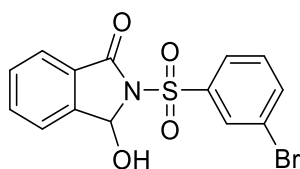

2-((3-bromophenyl)sulfonyl)-3-hydroxyisoindolin-1-one (**2o**). White solid (74%, 0.082g).  $^1\text{H}$  NMR (400 MHz, DMSO- $d_6$ )  $\delta$  8.25 (s, 1H), 8.13 (d,  $J = 8.0$  Hz, 1H), 7.97 (d,  $J = 8.1$  Hz, 1H), 7.82 (t,  $J = 7.4$  Hz, 1H), 7.79 - 7.64 (m, 4H), 7.62 (d,  $J = 8.0$  Hz, 1H), 6.79 (s, 1H).  $^{13}\text{C}$  NMR (101 MHz, DMSO- $d_6$ )  $\delta$  165.23, 145.38, 141.44, 137.39, 135.41, 131.89, 130.80, 130.53, 128.47, 127.35, 125.02, 124.33, 122.39, 84.11. HRMS (TOF)  $m/z$   $[\text{M} + \text{H}]^+$  Calcd for  $\text{C}_{14}\text{H}_{11}\text{NO}_4\text{BrS}^+$  367.9587 found 367.9600.

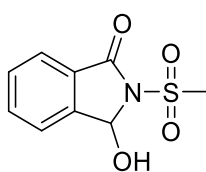

3-hydroxy-2-(methylsulfonyl)isoindolin-1-one (**2p**). White solid (71%, 0.049g).  $^1\text{H}$  NMR (400 MHz, DMSO- $d_6$ )  $\delta$  7.80 (dd,  $J = 7.0, 4.3$  Hz, 2H), 7.65 (t,  $J = 8.1$  Hz, 2H), 7.40 (d,  $J = 9.2$  Hz, 1H), 6.49 (d,  $J = 9.1$  Hz, 1H), 3.36 (s, 3H).  $^{13}\text{C}$  NMR (101 MHz, DMSO- $d_6$ )  $\delta$  166.03, 145.44, 135.18, 130.70, 128.97, 124.88, 124.26, 83.60, 42.15. HRMS (TOF)  $m/z$   $[\text{M} + \text{H}]^+$  Calcd for  $\text{C}_9\text{H}_{10}\text{NO}_4\text{S}^+$  228.0325 found 228.0340.

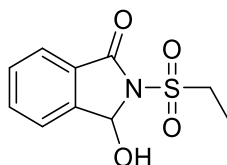

2-(ethylsulfonyl)-3-hydroxyisoindolin-1-one (**2q**). White solid (76%, 0.055g). <sup>1</sup>H NMR (400 MHz, Chloroform-*d*) δ 7.77 (d, *J* = 7.6 Hz, 1H), 7.66 (t, *J* = 7.5 Hz, 1H), 7.58 (d, *J* = 7.5 Hz, 1H), 7.51 (t, *J* = 7.5 Hz, 1H), 6.53 (d, *J* = 4.0 Hz, 1H), 4.59 (d, *J* = 4.8 Hz, 1H), 3.58 - 3.44 (m, 2H), 1.34 (t, *J* = 7.4 Hz, 3H). <sup>13</sup>C NMR (101 MHz, Chloroform-*d*) δ 164.76, 141.75, 133.74, 129.70, 127.99, 123.73, 123.37, 81.16, 47.73, 6.48. HRMS (TOF) *m/z* [M + H]<sup>+</sup> Calcd for C<sub>10</sub>H<sub>12</sub>NO<sub>4</sub>S<sup>+</sup> 242.0482 found 242.0455.

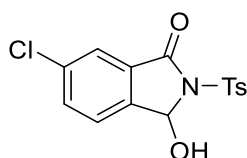

6-chloro-3-hydroxy-2-tosylisoindolin-1-one (**2r**). White solid (78%, 0.079g). <sup>1</sup>H NMR (400 MHz, DMSO-*d*<sub>6</sub>) δ 7.99 (d, *J* = 8.3 Hz, 2H), 7.82 (dd, *J* = 8.1, 1.9 Hz, 1H), 7.74 (d, *J* = 1.7 Hz, 1H), 7.68 (d, *J* = 8.2 Hz, 2H), 7.46 (d, *J* = 8.2 Hz, 2H), 6.73 (s, 1H), 2.40 (s, 3H). <sup>13</sup>C NMR (101 MHz, DMSO-*d*<sub>6</sub>) δ 163.85, 145.36, 143.94, 136.54, 135.46, 135.06, 130.73, 130.08, 128.33, 126.93, 123.82, 83.59, 21.56. HRMS (TOF) *m/z* [M + H]<sup>+</sup> Calcd for C<sub>16</sub>H<sub>16</sub>NO<sub>4</sub>S<sup>+</sup> 318.0795 found 318.0803. HRMS (TOF) *m/z* [M + H]<sup>+</sup> Calcd for C<sub>15</sub>H<sub>13</sub>NO<sub>4</sub>ClS<sup>+</sup> 338.0248 found 338.0267.

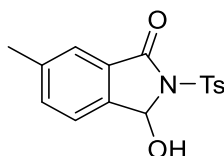

3-hydroxy-6-methyl-2-tosylisoindolin-1-one (**2s**). White solid (67%, 0.064g). <sup>1</sup>H NMR (400 MHz, DMSO-*d*<sub>6</sub>) δ 7.96 (d, *J* = 8.3 Hz, 2H), 7.58 (d, *J* = 7.8 Hz, 1H), 7.53 (t, *J* = 8.7 Hz, 2H), 7.49 (s, 1H), 7.44 (d, *J* = 8.2 Hz, 2H), 6.65 (d, *J* = 8.5 Hz, 1H), 2.39 (s, 3H), 2.38 (s, 3H). <sup>13</sup>C NMR (101 MHz, DMSO-*d*<sub>6</sub>) δ 165.24, 145.12, 142.73, 140.69, 136.82, 135.99, 130.04, 128.86, 128.23, 124.73, 124.03, 83.69, 21.55, 21.21. HRMS (TOF) *m/z* [M + H]<sup>+</sup> Calcd for C<sub>16</sub>H<sub>16</sub>NO<sub>4</sub>S<sup>+</sup> 318.0795 found 318.0788.

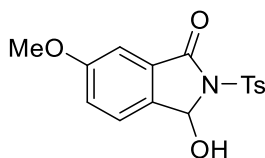

3-hydroxy-6-methoxy-2-tosylisoindolin-1-one (**2t**). White solid (80%, 0.080g). <sup>1</sup>H NMR (400 MHz, DMSO-*d*<sub>6</sub>) δ 7.96 (d, *J* = 8.3 Hz, 2H), 7.53 (dd, *J* = 13.1, 8.7 Hz, 2H), 7.44 (d, *J* = 8.3 Hz, 2H), 7.32 (dd, *J* = 8.4, 2.4 Hz, 1H), 7.15 (d, *J* = 2.4 Hz, 1H), 6.63 (d, *J* = 8.8 Hz, 1H), 3.81 (s, 3H), 2.39 (s, 3H). <sup>13</sup>C NMR (101 MHz, DMSO-*d*<sub>6</sub>) δ 165.07, 161.33, 145.16, 137.67, 136.78, 130.21, 130.04, 128.24, 126.12, 122.73, 106.99, 83.59, 56.26, 21.55. HRMS (TOF) *m/z* [M + H]<sup>+</sup> Calcd for C<sub>16</sub>H<sub>16</sub>NO<sub>5</sub>S<sup>+</sup> 334.0744 found 334.0787.

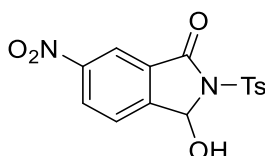

3-hydroxy-6-nitro-2-tosylisoindolin-1-one (**2u**). Yellow solid (86%, 0.090g). <sup>1</sup>H NMR (400 MHz,

DMSO-*d*<sub>6</sub>)  $\delta$  8.63–8.53 (m, 1H), 8.36 (s, 1H), 7.99 (d, *J* = 8.1 Hz, 2H), 7.91 (t, *J* = 8.8 Hz, 2H), 7.47 (d, *J* = 8.1 Hz, 2H), 6.85 (d, *J* = 4.8 Hz, 1H), 2.40 (s, 3H). <sup>13</sup>C NMR (101 MHz, DMSO-*d*<sub>6</sub>)  $\delta$  163.27, 150.67, 149.57, 145.58, 136.34, 130.25, 130.16, 129.93, 128.39, 126.83, 119.37, 83.66, 21.58. HRMS (TOF) *m/z* [M + H]<sup>+</sup> Calcd for C<sub>15</sub>H<sub>13</sub>N<sub>2</sub>O<sub>6</sub>S<sup>+</sup> 340.0489 found 349.0491.

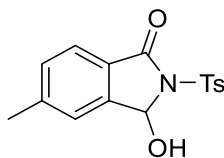

3-hydroxy-5-methyl-2-tosylisoindolin-1-one (**2v**). White solid (73%, 0.070g). <sup>1</sup>H NMR (400 MHz, DMSO-*d*<sub>6</sub>)  $\delta$  7.95 (d, *J* = 8.3 Hz, 2H), 7.58 (s, 1H), 7.56 (s, 1H), 7.45 (d, *J* = 2.8 Hz, 2H), 7.42 (s, 1H), 7.40 (d, *J* = 7.8 Hz, 1H), 6.64 (s, 1H), 2.44 (s, 3H), 2.39 (s, 3H). <sup>13</sup>C NMR (101 MHz, DMSO-*d*<sub>6</sub>)  $\delta$  165.09, 146.05, 145.71, 145.09, 136.87, 131.55, 130.03, 128.22, 126.15, 125.20, 124.05, 83.60, 21.97, 21.55. HRMS (TOF) *m/z* [M + H]<sup>+</sup> Calcd for C<sub>16</sub>H<sub>16</sub>NO<sub>4</sub>S<sup>+</sup> 318.0795 found 318.0803.

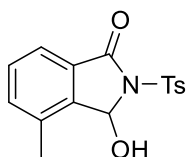

3-hydroxy-4-methyl-2-tosylisoindolin-1-one (**2w**). White solid (77%, 0.073g). <sup>1</sup>H NMR (400 MHz, DMSO-*d*<sub>6</sub>)  $\delta$  7.98 (d, *J* = 8.3 Hz, 2H), 7.58–7.50 (m, 2H), 7.50–7.46 (m, 2H), 7.44 (d, *J* = 8.3 Hz, 2H), 6.75 (s, 1H), 2.42 (s, 3H), 2.39 (s, 3H). <sup>13</sup>C NMR (101 MHz, DMSO-*d*<sub>6</sub>)  $\delta$  165.37, 145.14, 143.25, 136.86, 136.30, 135.59, 130.73, 130.02, 128.76, 128.29, 121.54, 83.34, 21.55, 17.33. HRMS (TOF) *m/z* [M + H]<sup>+</sup> Calcd for C<sub>16</sub>H<sub>16</sub>NO<sub>4</sub>S<sup>+</sup> 318.0795 found 318.0788.

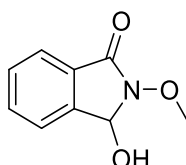

3-hydroxy-2-methoxyisoindolin-1-one (**2x**). White solid (58%, 0.031g). <sup>1</sup>H NMR (400 MHz, DMSO-*d*<sub>6</sub>)  $\delta$  7.69 (dt, *J* = 6.8, 3.3 Hz, 2H), 7.57 (d, *J* = 7.6 Hz, 2H), 7.10 (d, *J* = 8.6 Hz, 1H), 5.98 (d, *J* = 8.6 Hz, 1H), 3.91 (s, 3H). <sup>13</sup>C NMR (101 MHz, DMSO-*d*<sub>6</sub>)  $\delta$  163.48, 142.59, 133.30, 130.07, 129.53, 124.15, 122.98, 81.39, 64.55. HRMS (TOF) *m/z* [M + H]<sup>+</sup> Calcd for C<sub>9</sub>H<sub>10</sub>NO<sub>3</sub><sup>+</sup> 180.0655 found 180.0678.

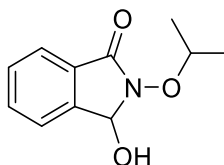

3-hydroxy-2-isopropoxyisoindolin-1-one (**2y**). Colorless oil (65%, 0.041g). <sup>1</sup>H NMR (400 MHz, DMSO-*d*<sub>6</sub>)  $\delta$  7.68 (d, *J* = 7.2 Hz, 2H), 7.57 (d, *J* = 6.8 Hz, 2H), 7.04 (d, *J* = 8.9 Hz, 1H), 5.88 (d, *J* = 8.9 Hz, 1H), 4.44 (p, *J* = 6.2 Hz, 1H), 1.28 (d, *J* = 2.4 Hz, 3H), 1.26 (d, *J* = 2.5 Hz, 3H). <sup>13</sup>C NMR (101 MHz, DMSO-*d*<sub>6</sub>)  $\delta$  165.11, 142.87, 133.27, 130.06, 129.60, 124.14, 122.98, 82.72, 78.30, 21.53.

HRMS (TOF)  $m/z$   $[M + H]^+$  Calcd for  $C_{11}H_{14}NO_3^+$  208.0968 found 208.0971.

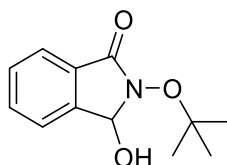

2-(*tert*-butoxy)-3-hydroxyisoindolin-1-one (**2z**). White solid (61%, 0.040g).  $^1H$  NMR (400 MHz,  $DMSO-d_6$ )  $\delta$  7.72-7.66 (m, 2H), 7.59-7.54 (m, 2H), 6.94 (d,  $J = 9.0$  Hz, 1H), 5.80 (d,  $J = 9.0$  Hz, 1H), 1.34 (s, 9H).  $^{13}C$  NMR (101 MHz,  $DMSO-d_6$ )  $\delta$  167.78, 143.54, 133.38, 130.09, 129.52, 124.32, 123.05, 83.71, 82.72, 28.06. HRMS (TOF)  $m/z$   $[M + H]^+$  Calcd for  $C_{12}H_{16}NO_3^+$  222.1125 found 222.1148.

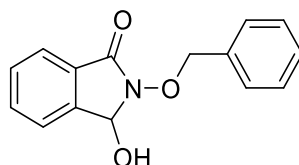

2-(benzyloxy)-3-hydroxyisoindolin-1-one (**2aa**). White solid (69%, 0.053g).  $^1H$  NMR (400 MHz,  $DMSO-d_6$ )  $\delta$  7.74 - 7.69 (m, 1H), 7.68 (dd,  $J = 7.5, 1.1$  Hz, 1H), 7.59 (d,  $J = 2.5$  Hz, 1H), 7.58 - 7.53 (m, 3H), 7.45 - 7.35 (m, 3H), 7.20 (d,  $J = 8.6$  Hz, 1H), 5.99 (d,  $J = 8.6$  Hz, 1H), 5.17 (s, 2H).  $^{13}C$  NMR (101 MHz,  $DMSO-d_6$ )  $\delta$  163.74, 142.64, 135.87, 133.32, 130.12, 129.62, 129.52, 129.03, 128.81, 124.18, 123.05, 81.90, 78.54. HRMS (TOF)  $m/z$   $[M + H]^+$  Calcd for  $C_{15}H_{14}NO_3^+$  256.0968 found 256.0951.

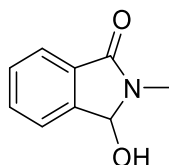

3-hydroxy-2-methylisoindolin-1-one (**2ac**). White solid (35%, 0.017g).  $^1H$  NMR (400 MHz,  $DMSO-d_6$ )  $\delta$  7.64 (d,  $J = 7.4$  Hz, 1H), 7.63 - 7.57 (m, 2H), 7.52 (td,  $J = 7.1, 1.9$  Hz, 1H), 6.59 (d,  $J = 8.9$  Hz, 1H), 5.72 (d,  $J = 8.5$  Hz, 1H), 2.96 (s, 3H).  $^{13}C$  NMR (101 MHz,  $DMSO-d_6$ )  $\delta$  166.47, 145.34, 132.28, 132.23, 129.70, 123.91, 122.63, 82.61, 26.20. HRMS (TOF)  $m/z$   $[M + H]^+$  Calcd for  $C_9H_{10}NO_2^+$  164.0706 found 164.0752.

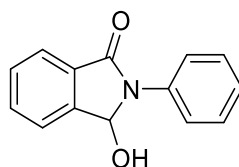

3-hydroxy-2-phenylisoindolin-1-one (**2ad**). White solid (44%, 0.030g).  $^1H$  NMR (400 MHz,  $Chloroform-d$ )  $\delta$  7.66 - 7.57 (m, 4H), 7.54 (t,  $J = 7.4$  Hz, 1H), 7.36 (t,  $J = 7.4$  Hz, 1H), 7.30 (t,  $J = 7.9$  Hz, 2H), 7.13 (t,  $J = 7.4$  Hz, 1H), 6.28 (d,  $J = 10.6$  Hz, 1H), 3.44 (d,  $J = 11.0$  Hz, 1H).  $^{13}C$  NMR



(101 MHz, Chloroform-*d*)  $\delta$  165.47, 141.73, 136.03, 131.86, 130.36, 129.19, 128.02, 124.29, 122.81, 122.22, 120.82, 81.88. HRMS (TOF)  $m/z$   $[M + H]^+$  Calcd for  $C_{14}H_{12}NO_2^+$  226.0863 found 226.0856.

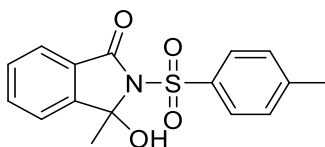

3-hydroxy-3-methyl-2-tosylisoindolin-1-one (**2ae**). White solid (86%, 0.082g).  $^1H$  NMR (400 MHz, DMSO-*d*<sub>6</sub>)  $\delta$  8.01 (d,  $J = 8.4$  Hz, 1H), 7.82 - 7.75 (m, 1H), 7.75 - 7.67 (m, 2H), 7.65 (s, 1H), 7.58 (td,  $J = 7.4, 1.0$  Hz, 1H), 7.44 (d,  $J = 8.1$  Hz, 2H), 7.40 - 7.33 (m, 1H), 2.39 (s, 2.3H, major), 2.38 (s, 0.7H, minor), 2.12 (s, 3H).  $^{13}C$  NMR (101 MHz, DMSO-*d*<sub>6</sub>)  $\delta$  165.21, 149.83, 144.92, 137.24, 135.39, 130.49, 129.82, 129.77, 128.48, 127.17, 126.12, 124.03, 123.12, 94.50, 27.62, 21.53. HRMS (TOF)  $m/z$   $[M + H]^+$  Calcd for  $C_{16}H_{16}NO_4S^+$  318.0795 found 318.0825.

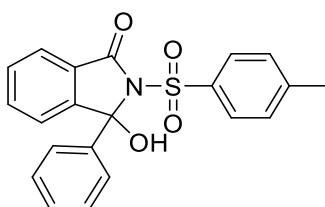

3-hydroxy-3-phenyl-2-tosylisoindolin-1-one (**2af**). White solid (54%, 0.061g).  $^1H$  NMR (400 MHz, DMSO-*d*<sub>6</sub>)  $\delta$  8.23 (s, 1H), 7.80 - 7.63 (m, 4H), 7.59 - 7.41 (m, 3H), 7.41 - 7.29 (m, 5H), 7.23 (d,  $J = 7.7$  Hz, 1H), 2.37 (s, 2.1H, major), 2.37 (s, 1.0H, minor).  $^{13}C$  NMR (101 MHz, DMSO-*d*<sub>6</sub>)  $\delta$  165.70, 150.20, 145.05, 142.33, 141.93, 140.89, 136.92, 135.67, 130.53, 129.77, 129.66, 128.72, 128.61, 126.98, 126.11, 124.18, 123.85, 95.42, 21.55 (major), 21.38 (minor). HRMS (TOF)  $m/z$   $[M + H]^+$  Calcd for  $C_{21}H_{18}NO_4S^+$  380.0951 found 380.0947.

## 8. References

- [1] (a) W. t. Wei, Z. y. Chen, Y. l. Lin, R. x. Chen, Q. Wang, Q. g. Wu, S. j. Liu, M. Yan and X. j. Zhang, Synthesis of Isoindolinones through Intramolecular Amidation of *ortho*-Vinyl Benzamides, *Adv. Synth. Catal.*, 2020, **362**, 1972-1976; (b) Z.-y. Chen, L.-y. Wu, H.-s. Fang, T. Zhang, Z.-f. Mao, Y. Zou, X.-j. Zhang and M. Yan, Intramolecular Hydroamidation of *ortho*-Vinyl Benzamides Promoted by Potassium *tert*-Butoxide/*N,N*-Dimethylformamide, *Adv. Synth. Catal.*, 2017, **359**, 3894-3899.
- [2] T. Takesue, M. Fujita, T. Sugimura and H. Akutsu, A series of two oxidation reactions of *ortho*-alkenylbenzamide with hypervalent iodine(III): a concise entry into (3*R*,4*R*)-4-hydroxymellein and (3*R*,4*R*)-4-hydroxy-6-methoxymellein, *Org. Lett.*, 2014, **16**, 4634-4637.
- [3] Y. Deng, X. J. Wei, H. Wang, Y. Sun, T. Noël and X. Wang, Disulfide-Catalyzed Visible-Light-Mediated Oxidative Cleavage of C=C Bonds and Evidence of an Olefin-Disulfide Charge-Transfer Complex, *Angew. Chem., Int. Ed.*, 2017, **56**, 832-836.
- [4] (a) A. Rajagopalan, M. Lara and W. Kroutil, Oxidative Alkene Cleavage by Chemical and Enzymatic Methods, *Adv. Synth. Catal.*, 2013, **355**, 3321-3335. (b) J. P. Wan, Y. Gao and L. Wei, Recent Advances in Transition-Metal-Free Oxygenation of Alkene C=C Double Bonds for Carbonyl Generation, *Chem. Asian J.*, 2016, **11**, 2092-2102. (c) X. Wang, Y. Li and Z. Li, Thiol-initiated photocatalytic oxidative cleavage of the C=C bond in olefins and its extension to direct production of acetals from olefins, *Catal. Sci. Technol.*, 2021, **11**, 1000-1006. (d) U. R. Pillai, E. Sahle-Demessie, V. V. Namboodiri and R. S. Varma, An efficient and ecofriendly oxidation of alkenes using iron nitrate and molecular oxygen, *Green Chem.*, 2002, **4**, 495-497. (e) M. J. Rak, M. Lerro and A. Moores, Hollow iron oxide nanoshells are active and selective catalysts for the partial oxidation of styrene with molecular oxygen, *Chem.*

*Commun.*, 2014, **50**, 12482-12485. (f) J. Hua, M. Bian, T. Ma, M. Yang, W. He, Z. Yang, C. Liu, Z. Fang and K. Guo, The sunlight-promoted aerobic selective cyclization of olefinic amides and diselenides, *Catal. Sci. Technol.*, 2021, **11**, 2299-2305. (g) L. B. Zhang, Z. C. Wang, S. Z. Sun, S. F. Ni, L. R. Wen and M. Li, Metal-Free Catalyzed Cyclization of N-Methoxybenzamides to Construct Quaternary Carbon-Containing Isoindolinones *Chin. J. Chem.*, 2021, **39**, 903-908. (h) H. Vosooghian and M. H. Habibi, Photooxidation of Some Organic Sulfides under UV Light Irradiation Using Titanium Dioxide Photocatalyst, *International Journal of Photoenergy*, 2007, **2007**, 7. (i) Y. Nosaka and A. Y. Nosaka, Generation and Detection of Reactive Oxygen Species in Photocatalysis, *Chem. Rev.*, 2017, **117**, 11302-11336. (j) Y. Chen, A. J. Spiering, S. Karthikeyan, G. W. Peters, E. W. Meijer and R. P. Sijbesma, Mechanically induced chemiluminescence from polymers incorporating a 1,2-dioxetane unit in the main chain, *Nat. Chem.*, 2012, **4**, 559-562. (k) R. M. O'Connor and A. Greer, How Tryptophan Oxidation Arises by "Dark" Photoreactions from Chemiexcited Triplet Acetone, *Photochem Photobiol*, 2021, **97**, 456-459.

## 9. $^1\text{H}$ NMR, $^{13}\text{C}$ NMR and $^{19}\text{F}$ NMR spectra

$^1\text{H}$  NMR of compound 2a

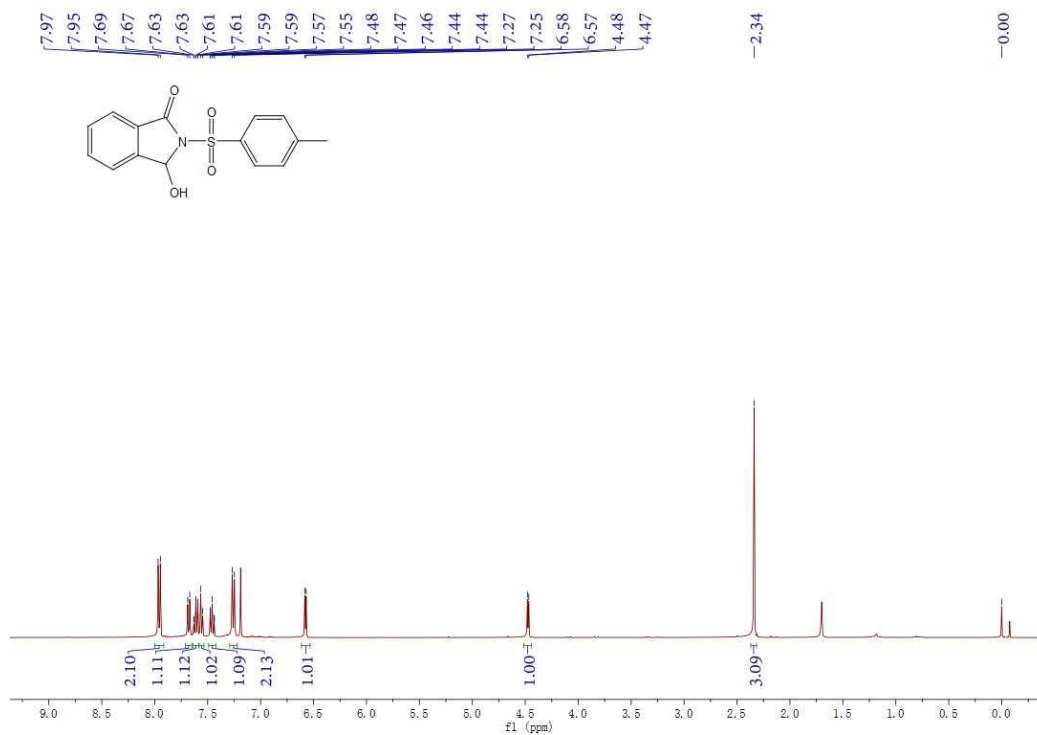

$^{13}\text{C}$  NMR of compound 2a

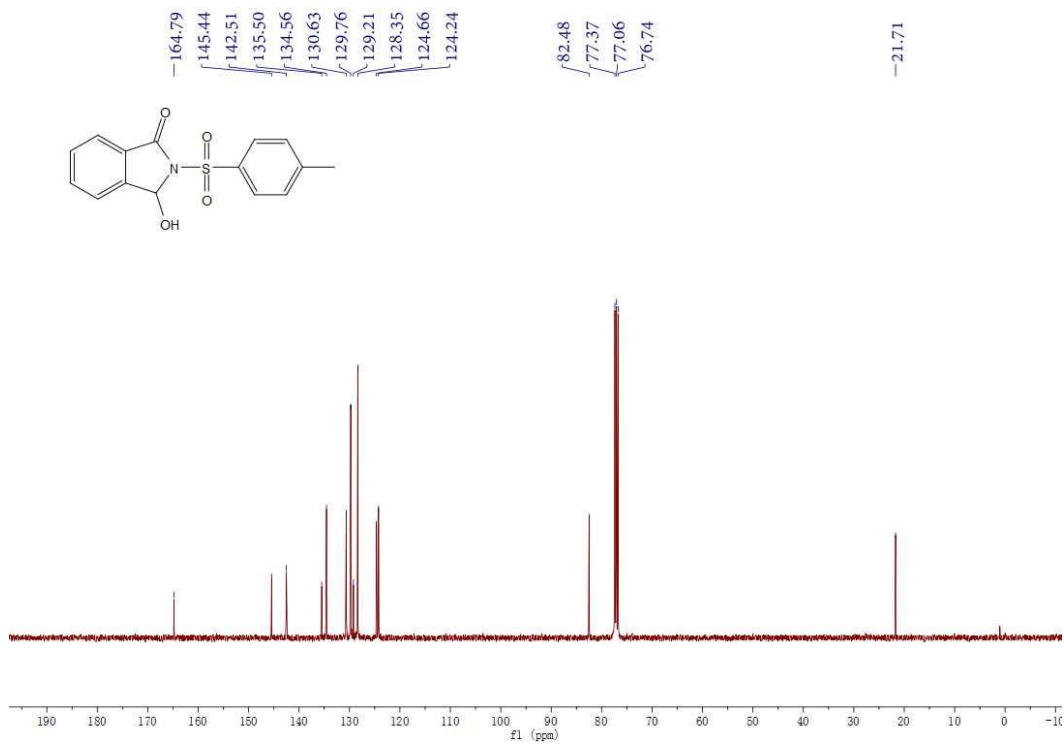

### <sup>1</sup>H NMR of compound **2b**

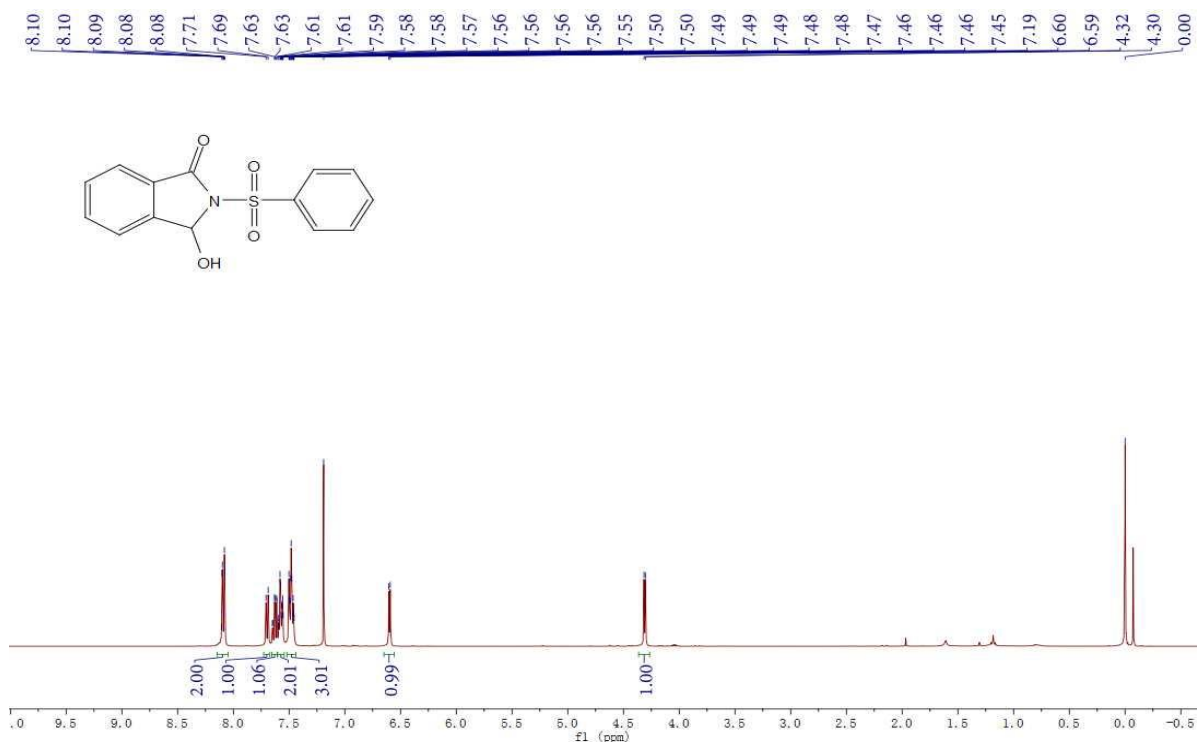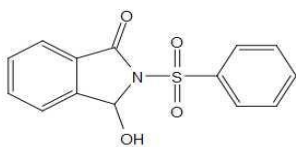

### <sup>13</sup>C NMR of compound **2b**

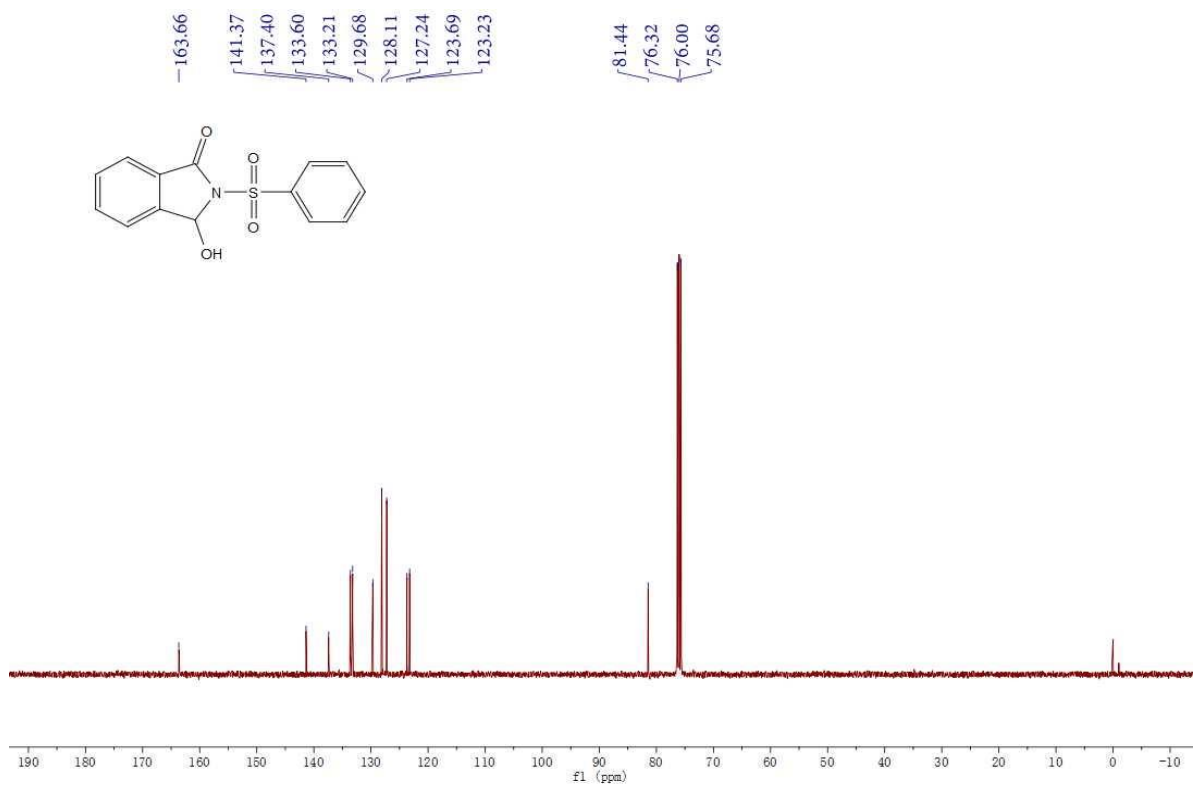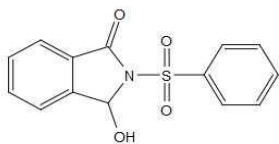

### <sup>1</sup>H NMR of compound 2c

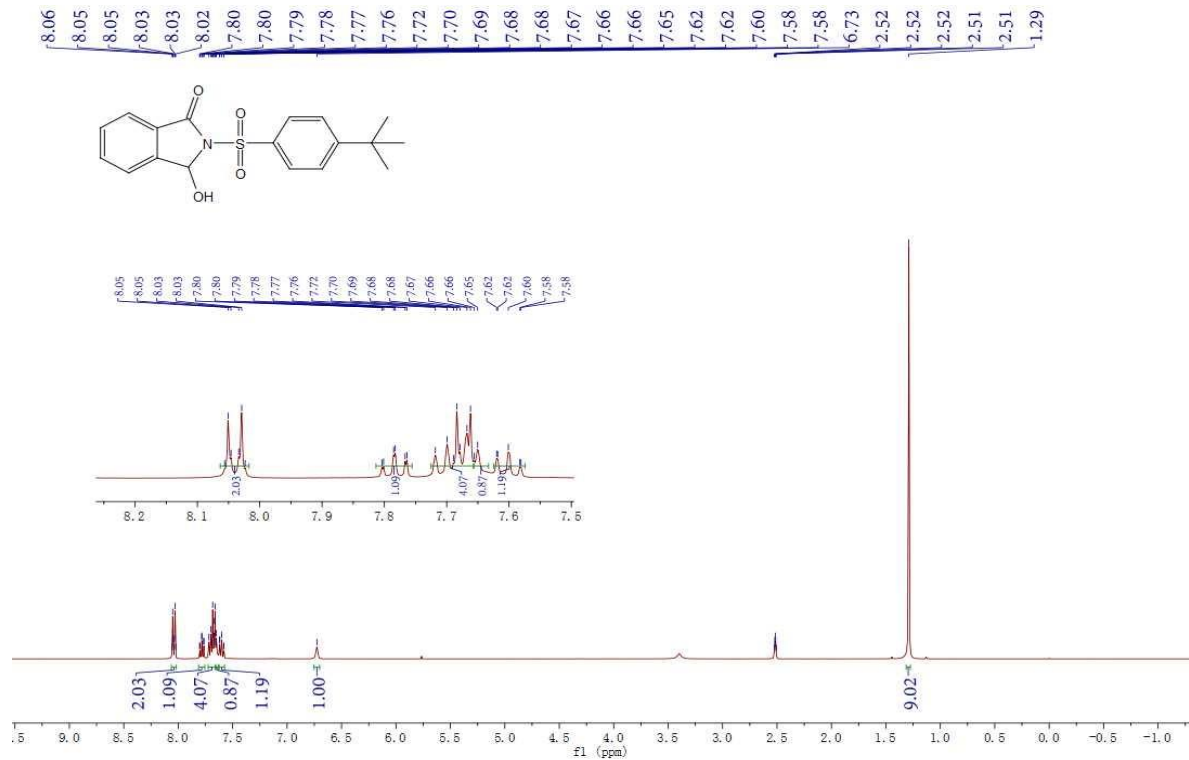

### <sup>13</sup>C NMR of compound 2c

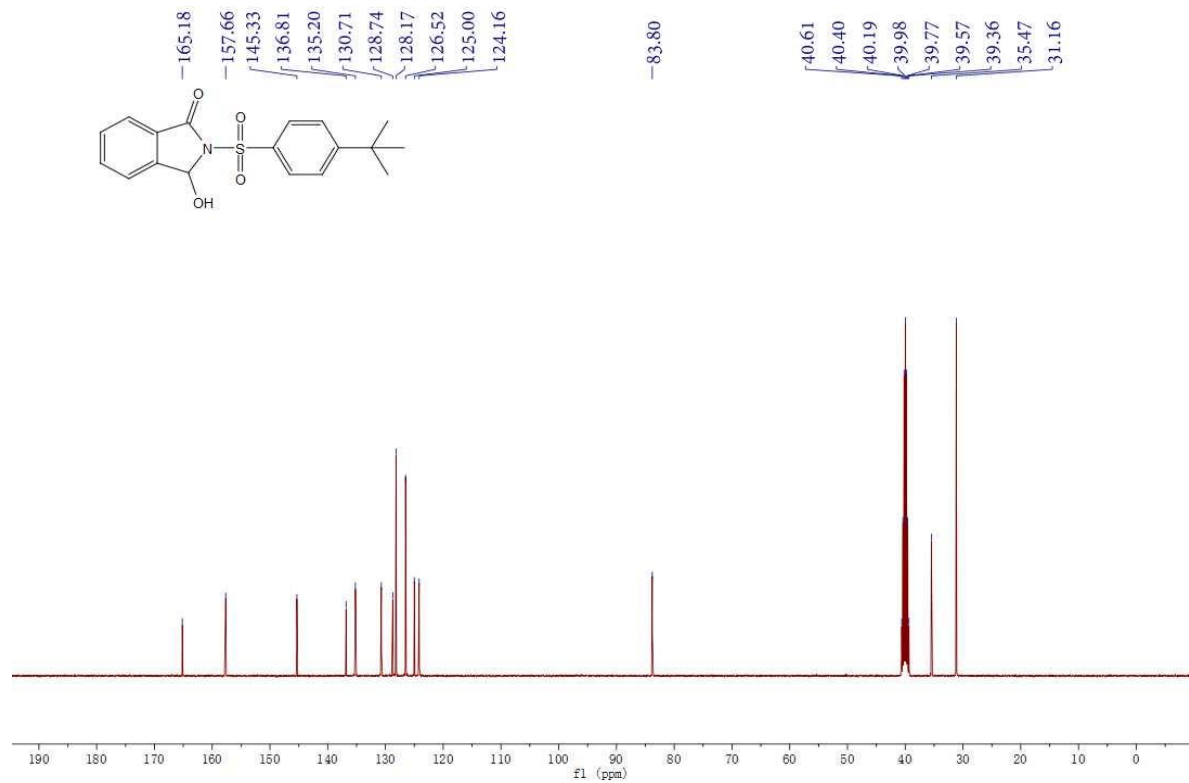

### <sup>1</sup>H NMR of compound **2d**

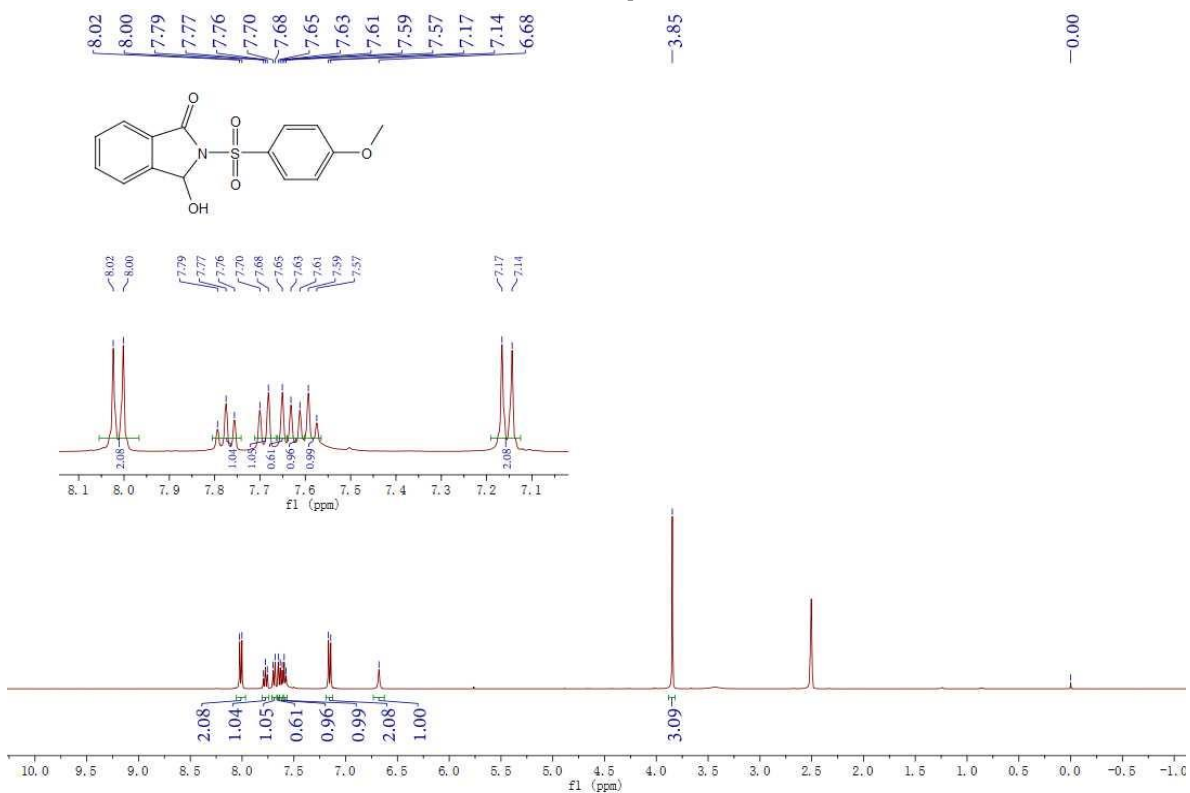

### <sup>13</sup>C NMR of compound **2d**

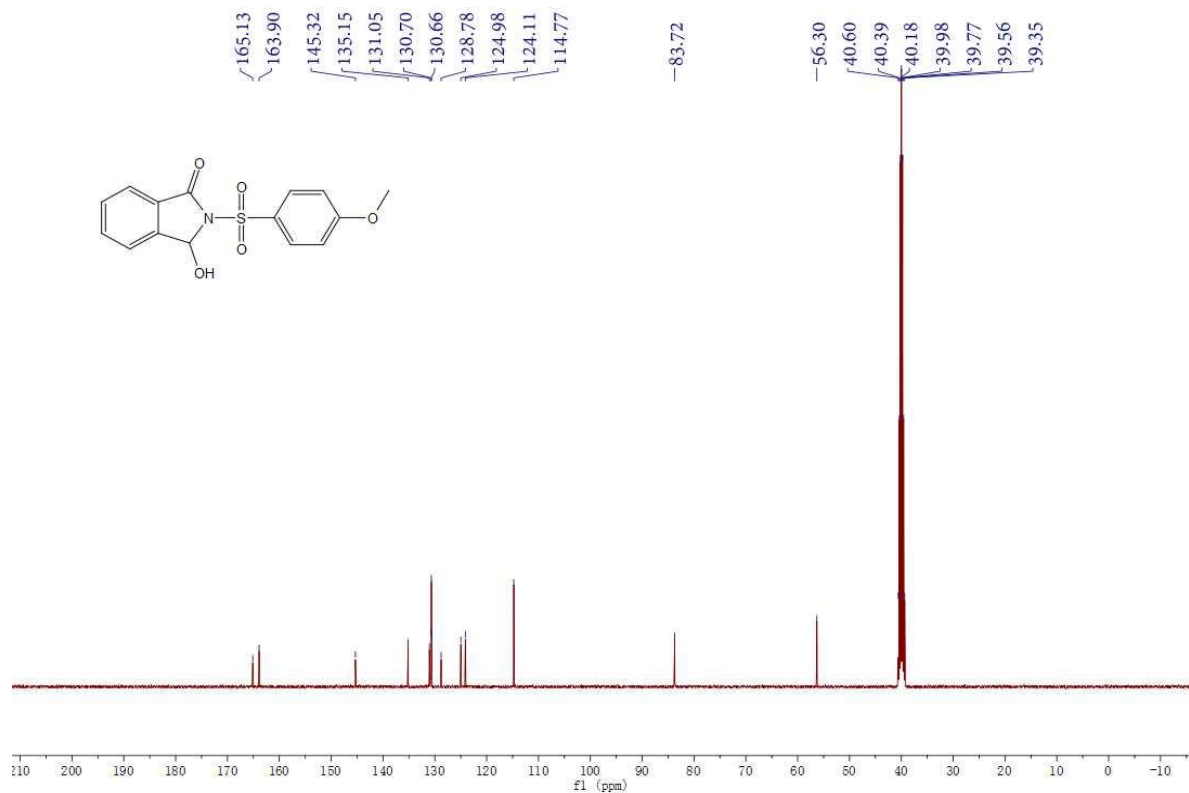

### <sup>1</sup>H NMR of compound 2e

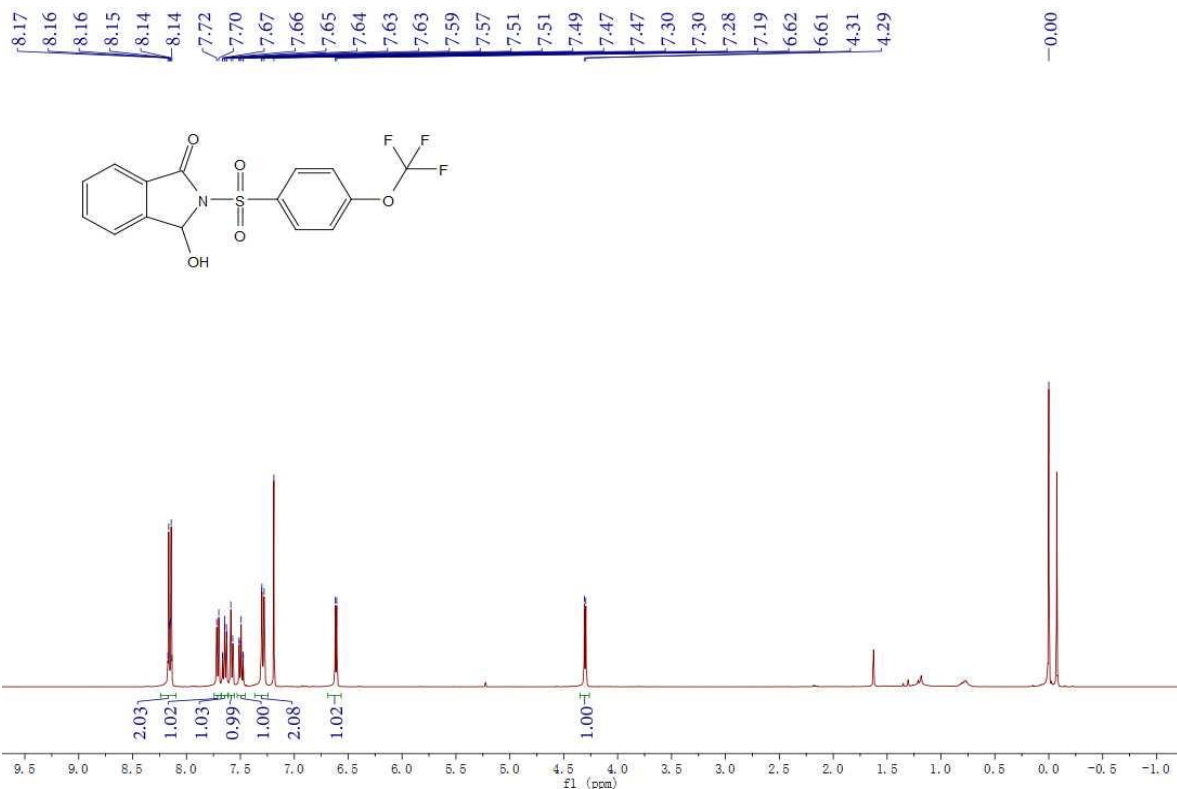

### <sup>13</sup>C NMR of compound 2e

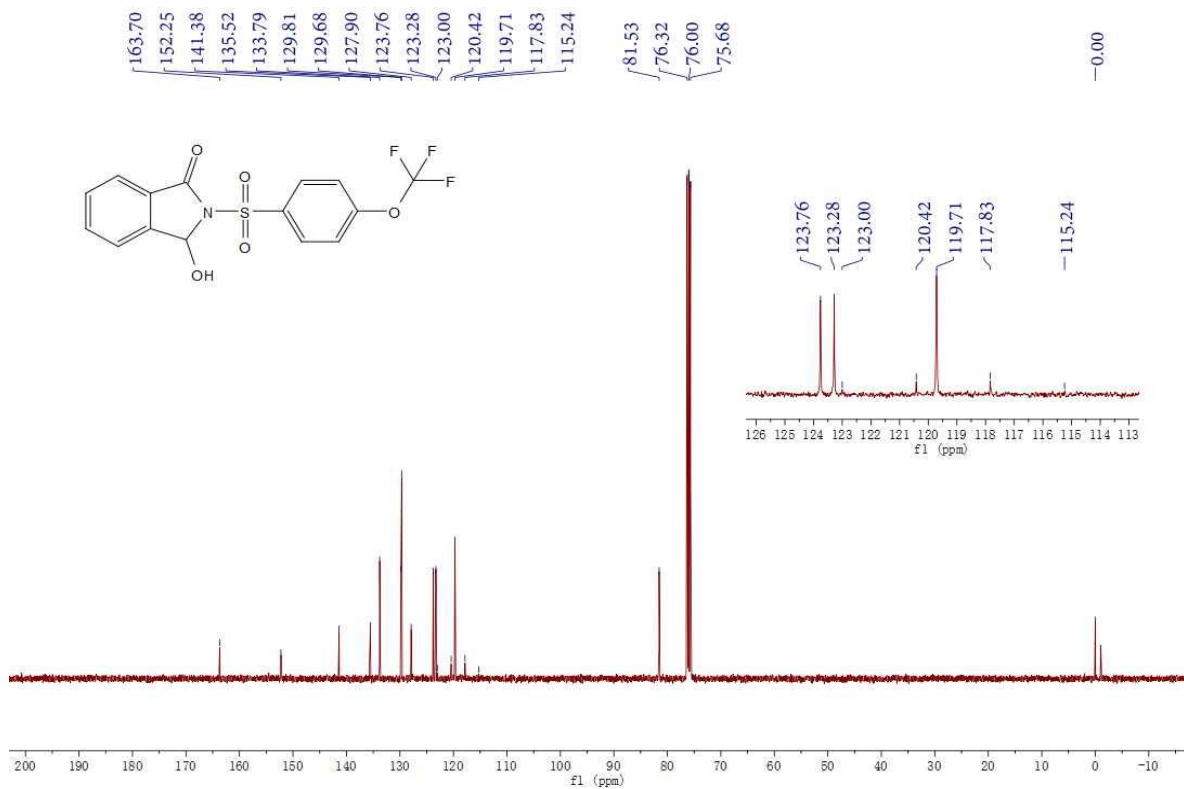





### <sup>13</sup>C NMR of compound **2f**

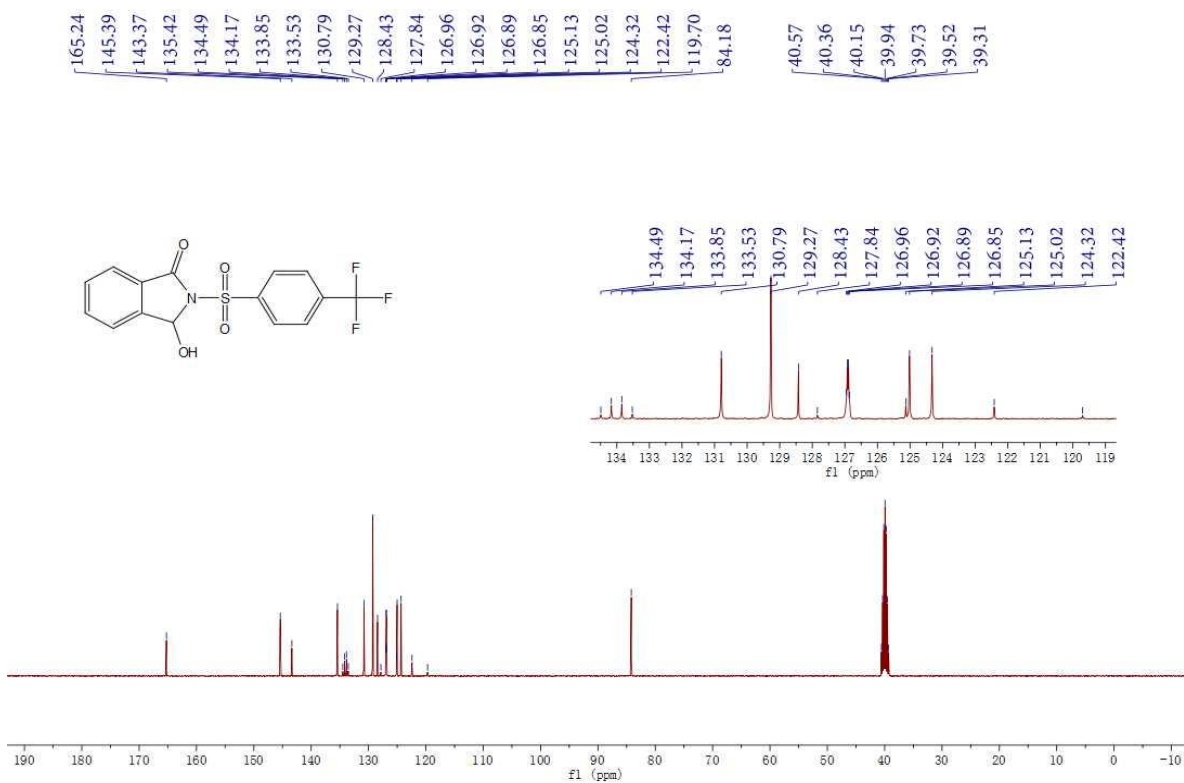

### <sup>19</sup>F NMR of compound **2f**

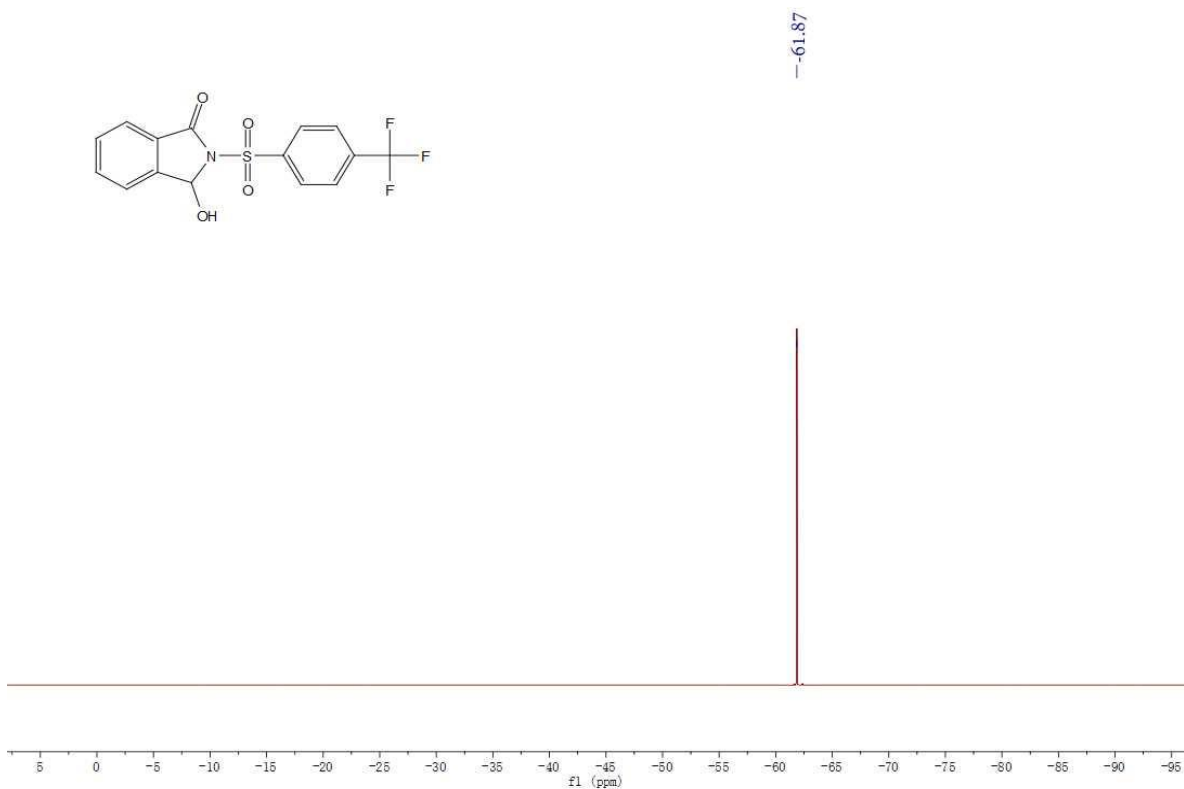





### <sup>13</sup>C NMR of compound 2h

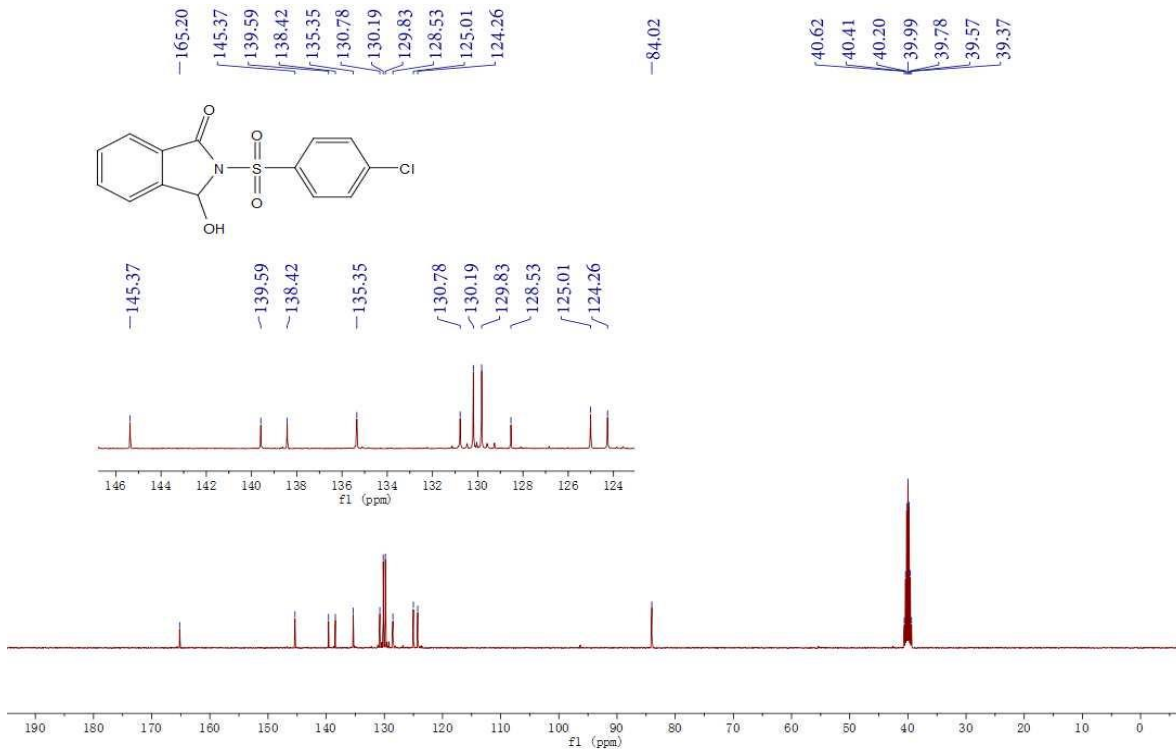

### <sup>1</sup>H NMR of compound 2i

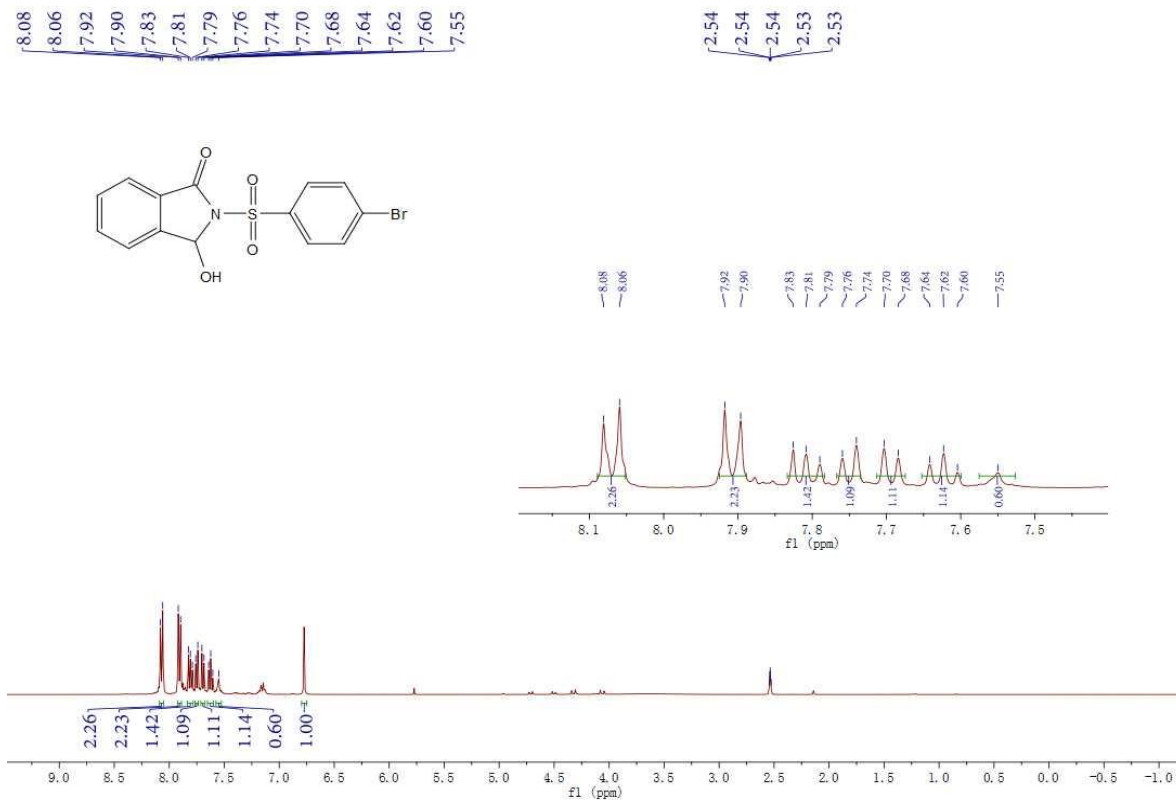

### <sup>13</sup>C NMR of compound 2i

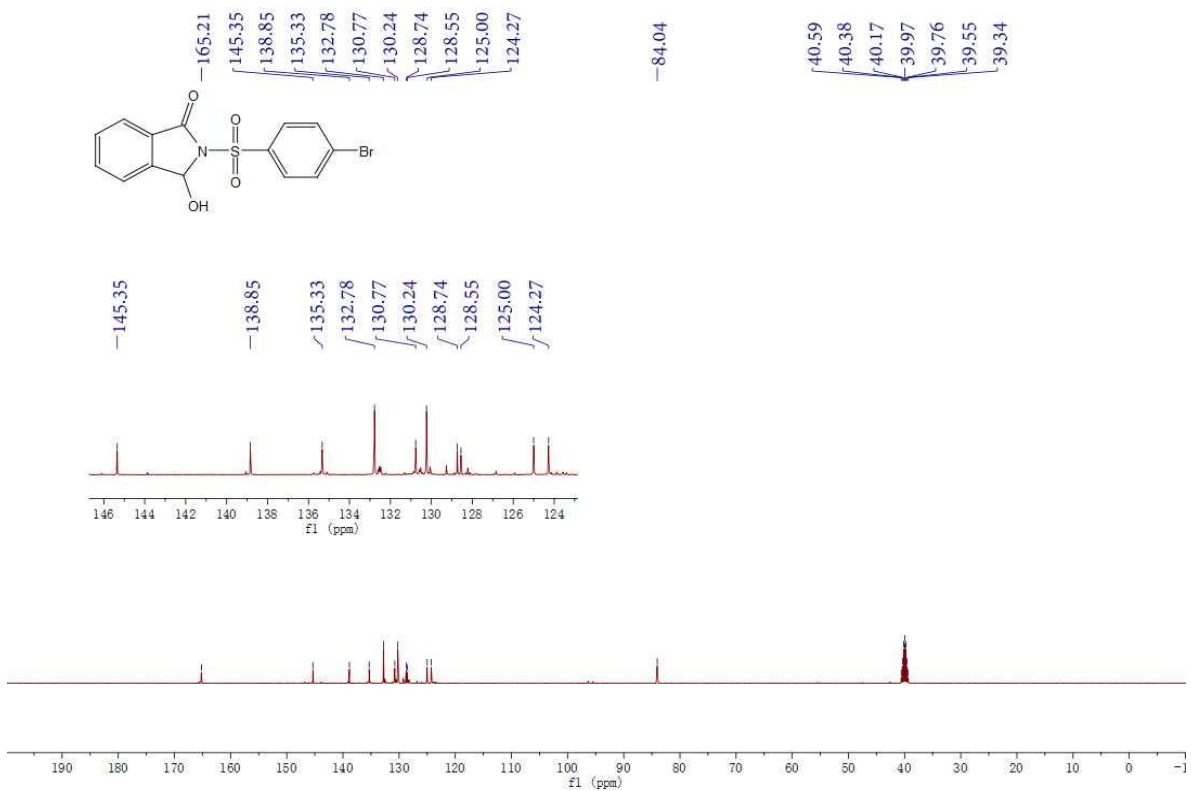

### <sup>1</sup>H NMR of compound 2j

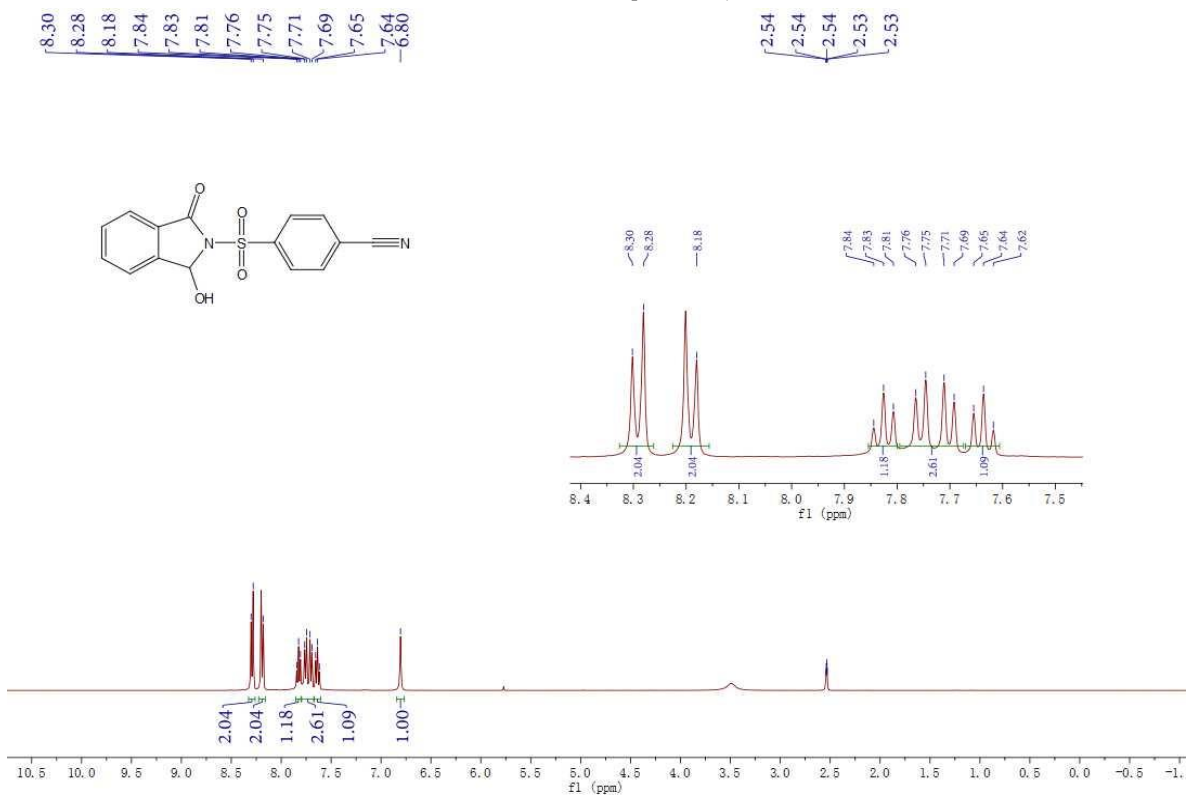

### <sup>13</sup>C NMR of compound 2j

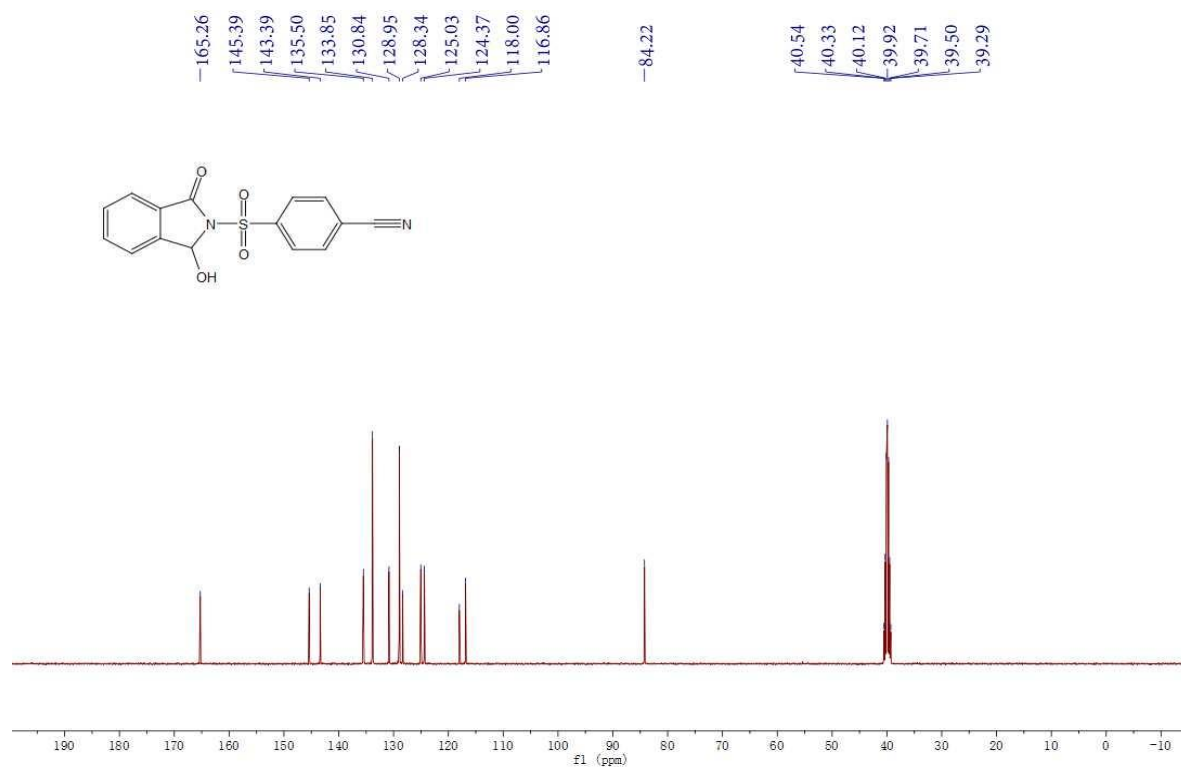

### <sup>1</sup>H NMR of compound 2k

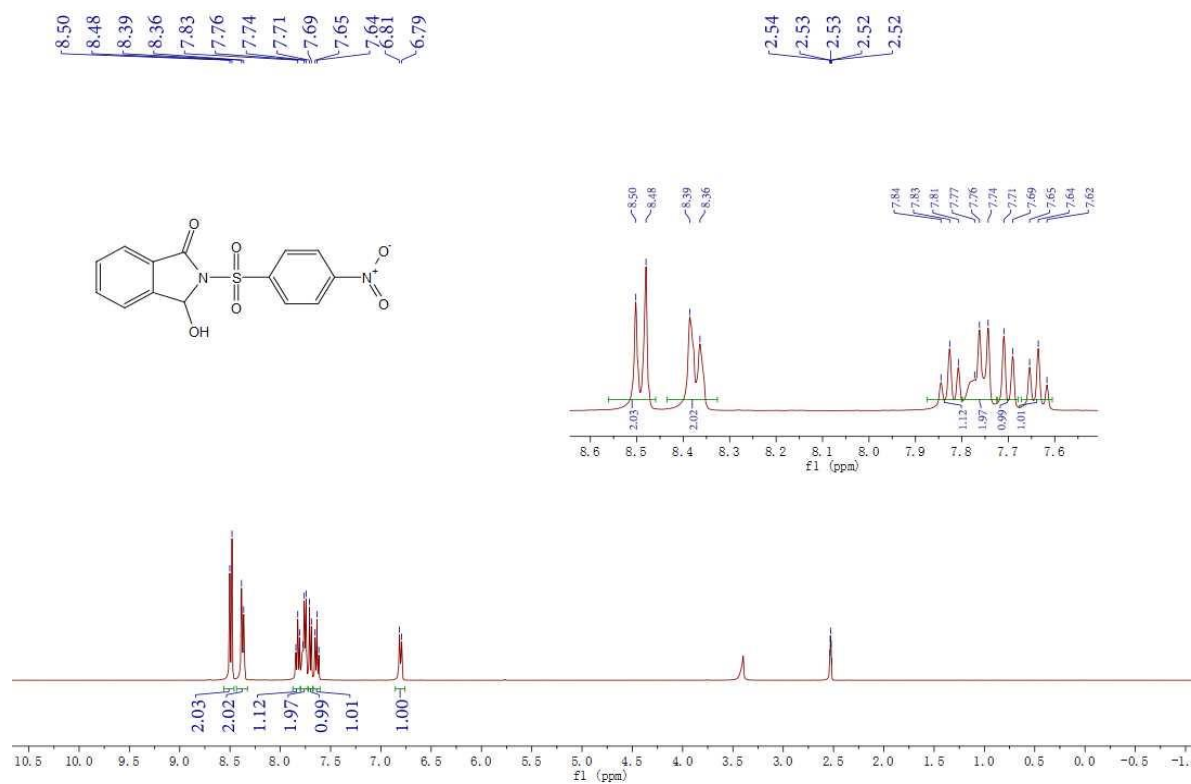

### <sup>13</sup>C NMR of compound 2k

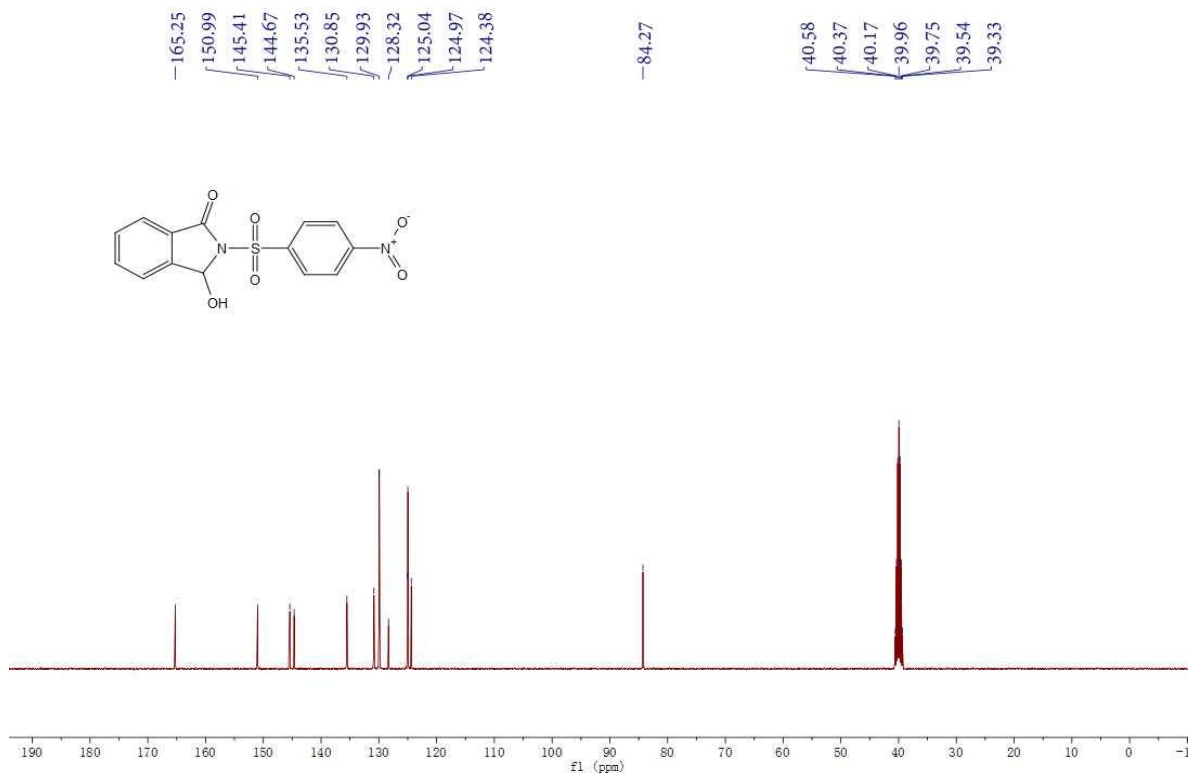

### <sup>1</sup>H NMR of compound 2l

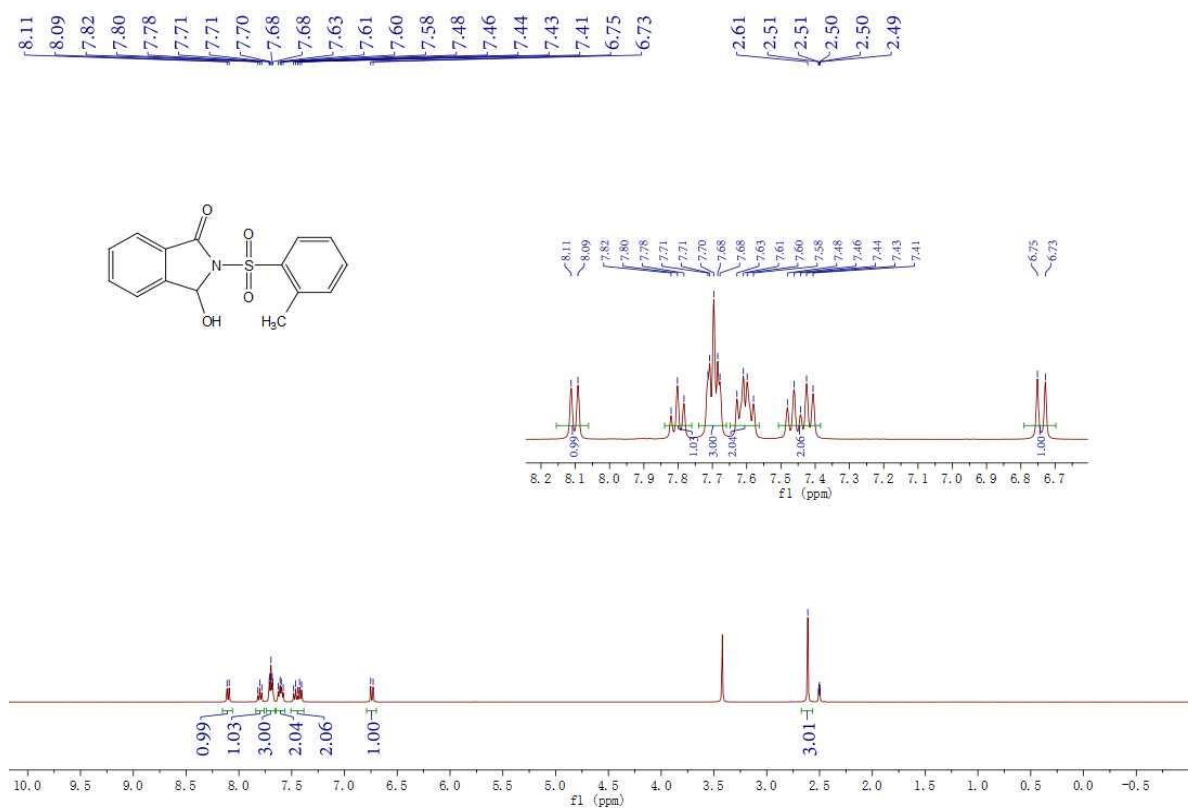

### <sup>13</sup>C NMR of compound 2l

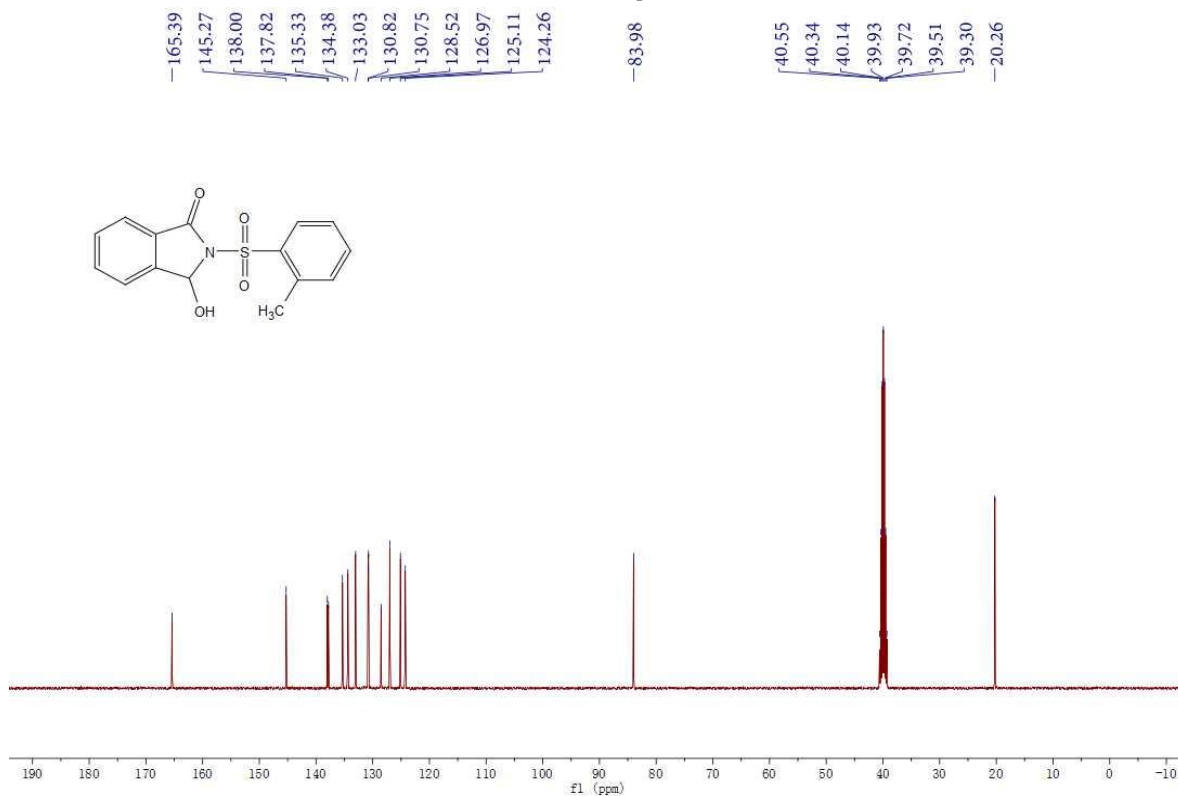

### <sup>1</sup>H NMR of compound 2m

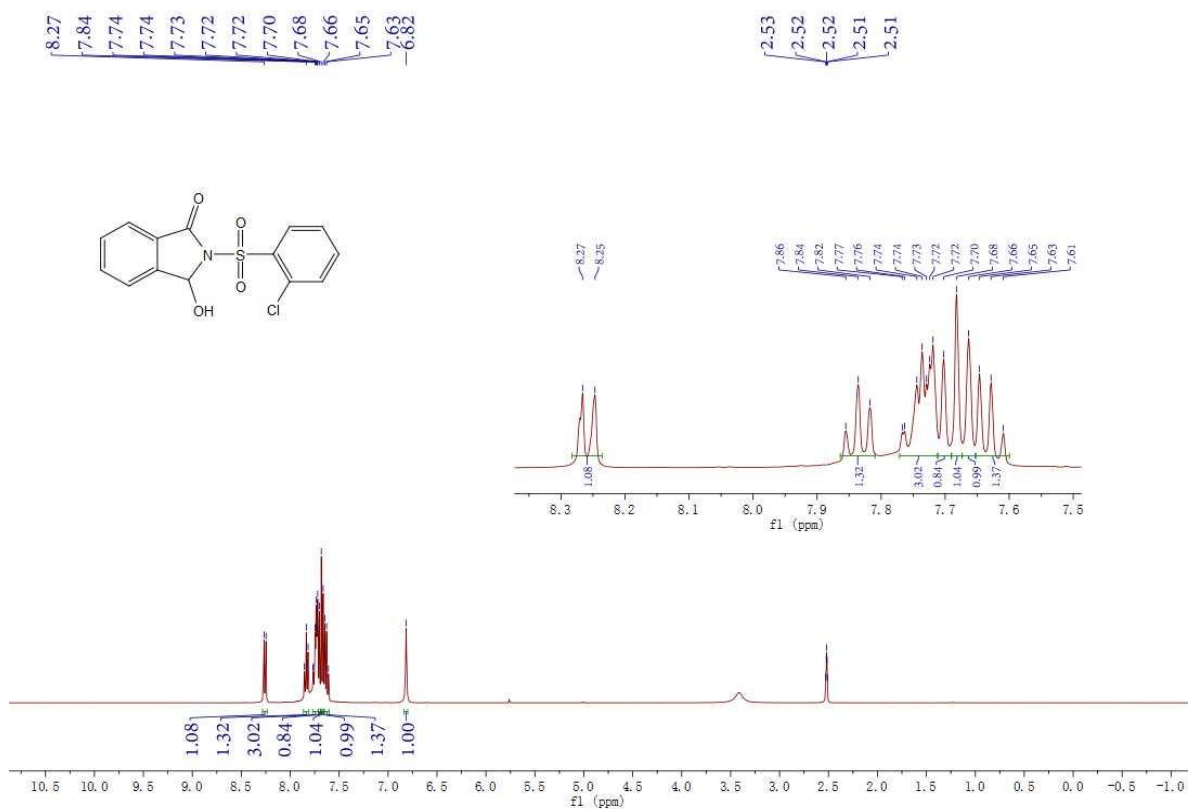



**<sup>13</sup>C NMR of compound 2m**

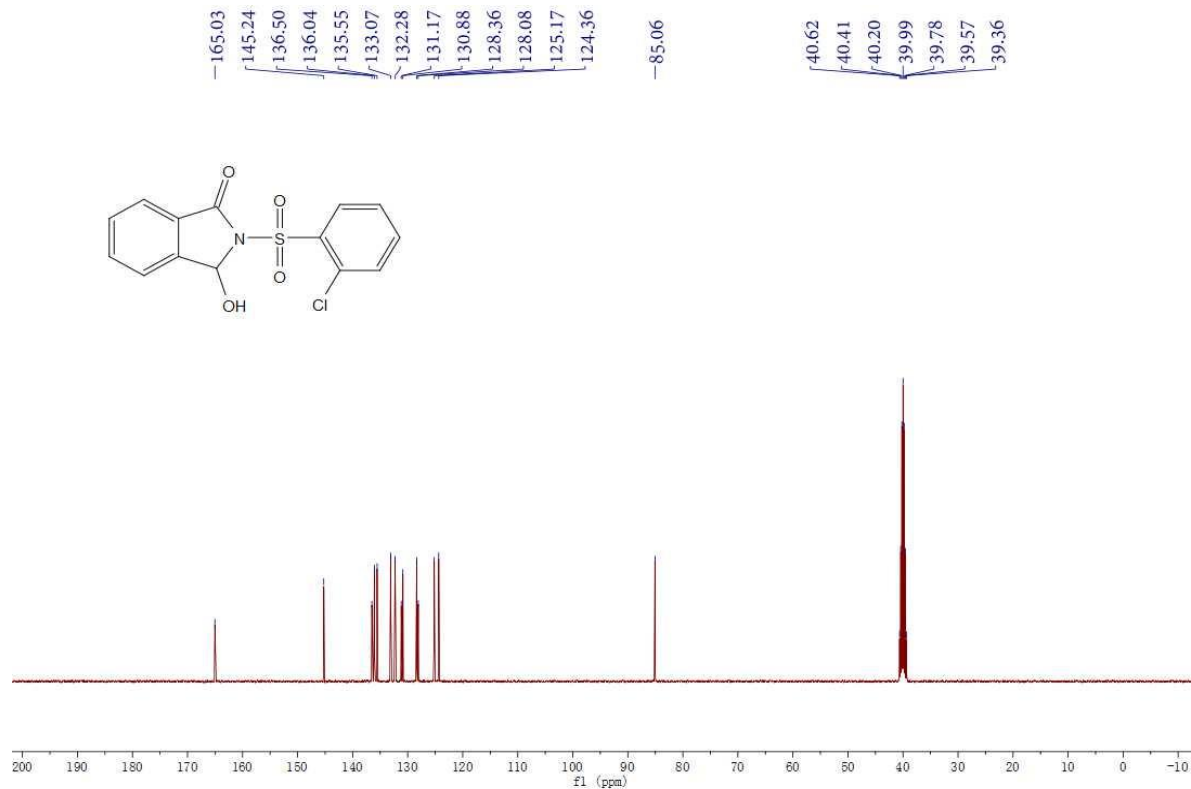

**<sup>1</sup>H NMR of compound 2n**

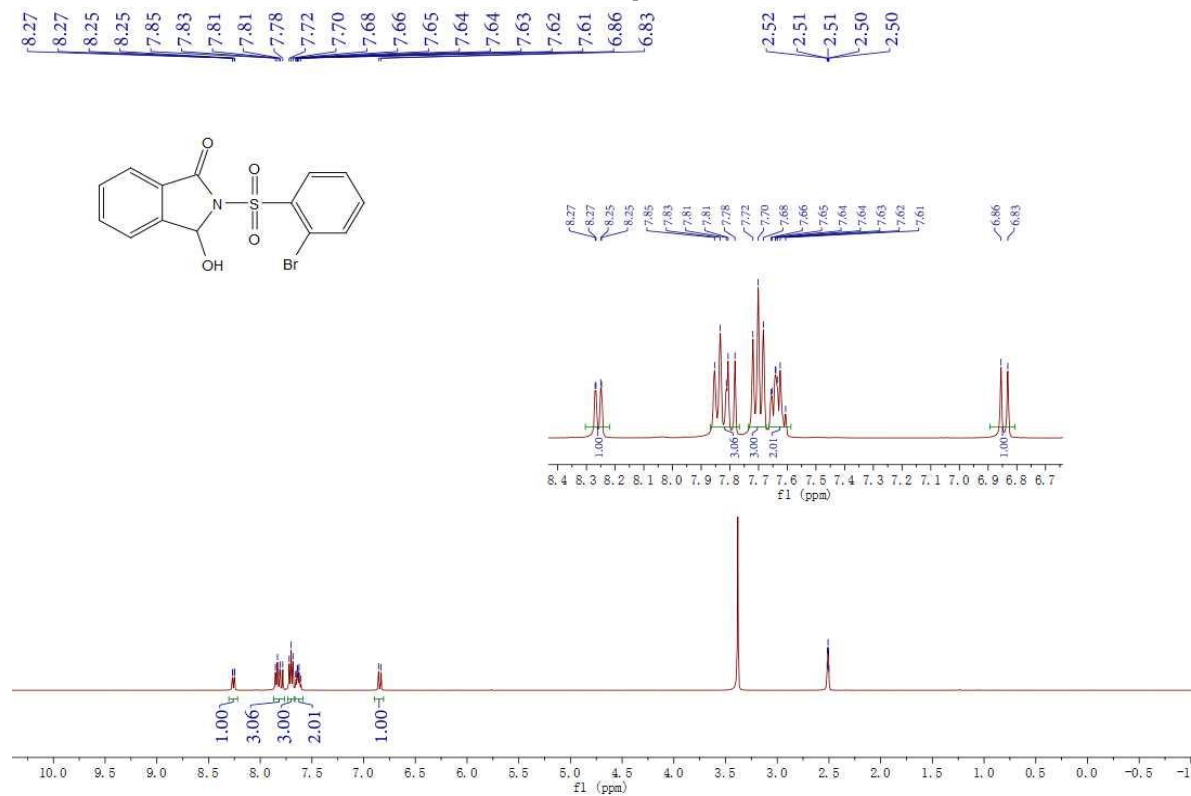

### <sup>13</sup>C NMR of compound 2n

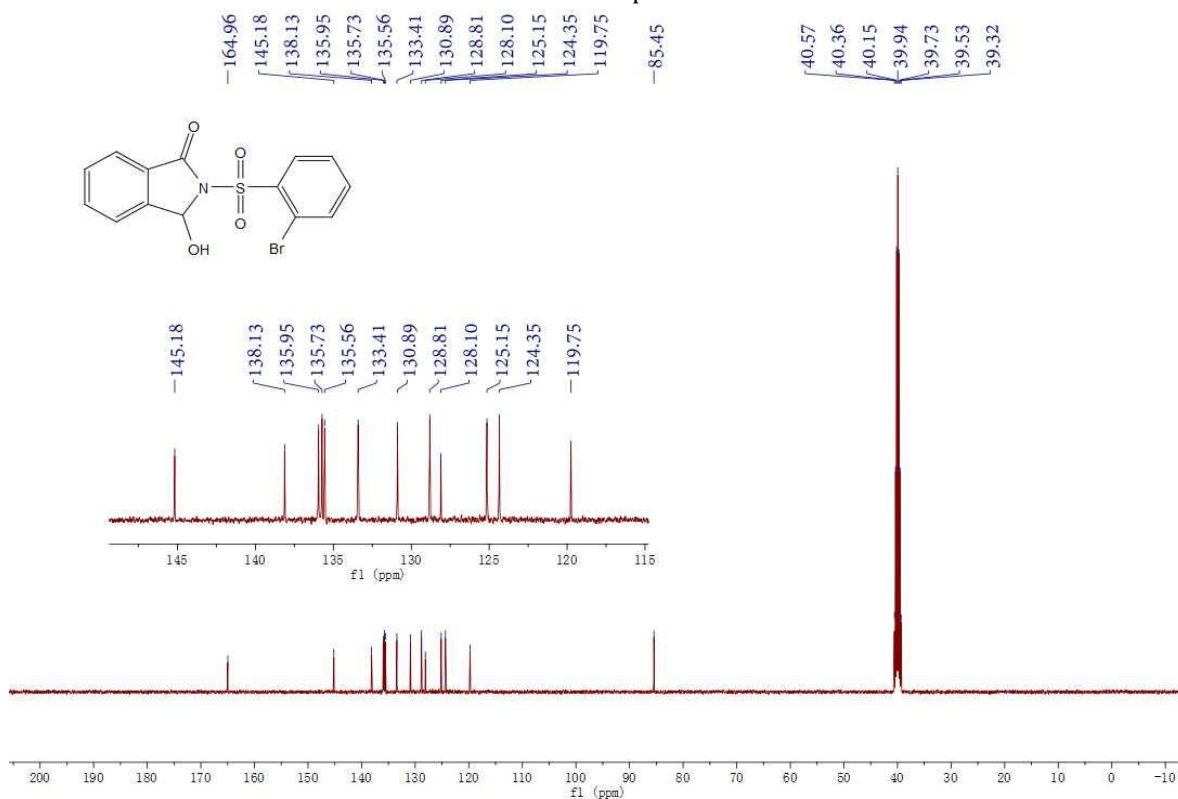

### <sup>1</sup>H NMR of compound 2o

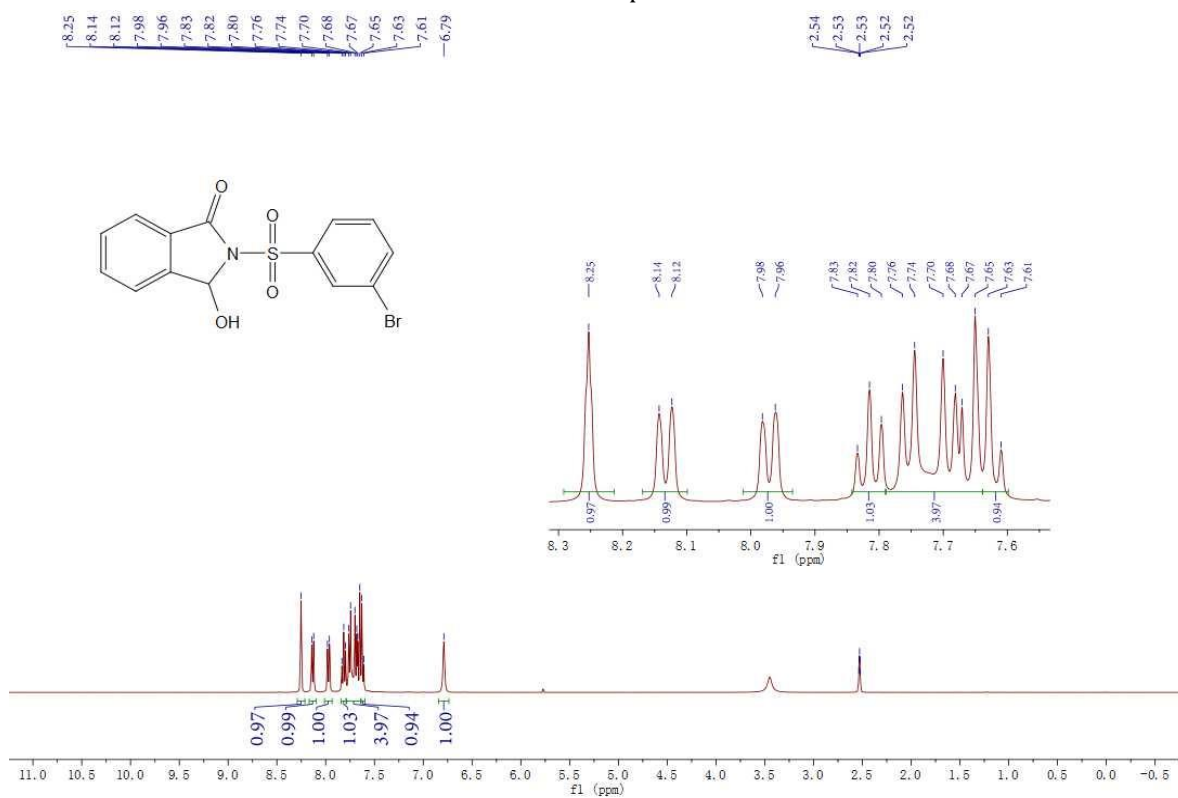

### <sup>13</sup>C NMR of compound 2o

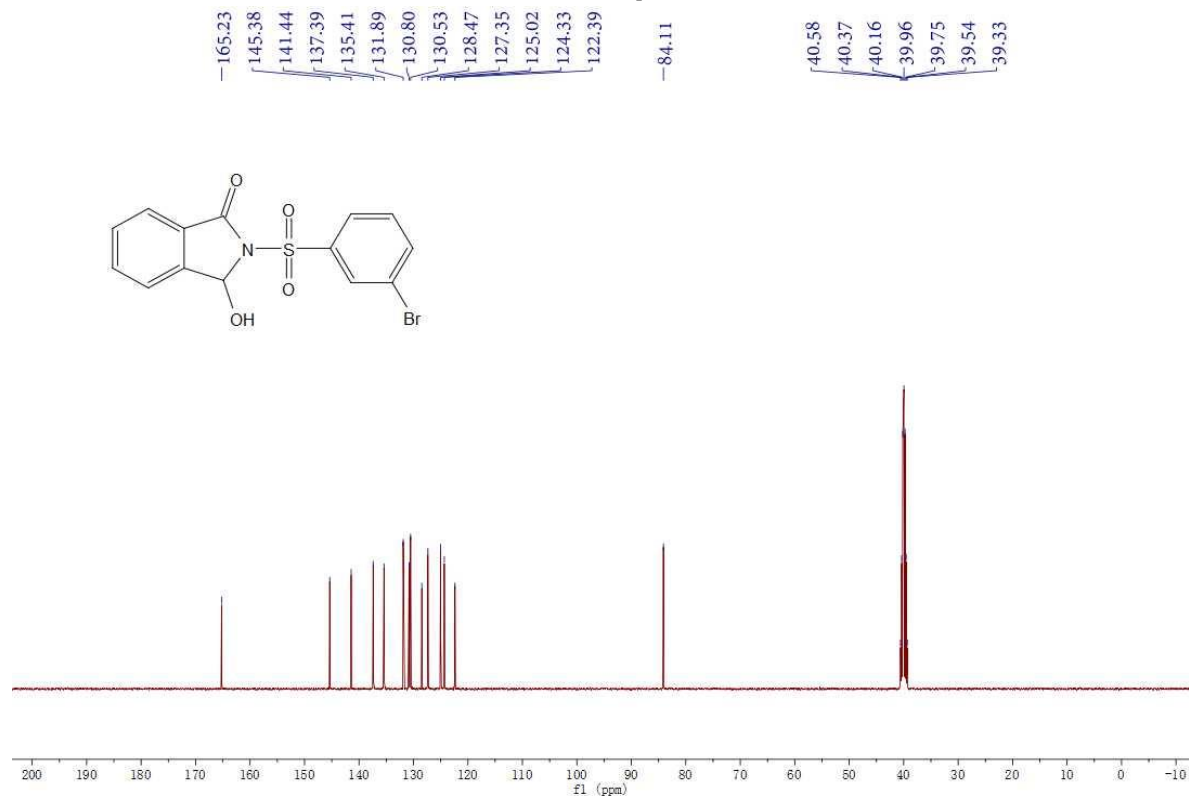

### <sup>1</sup>H NMR of compound 2p

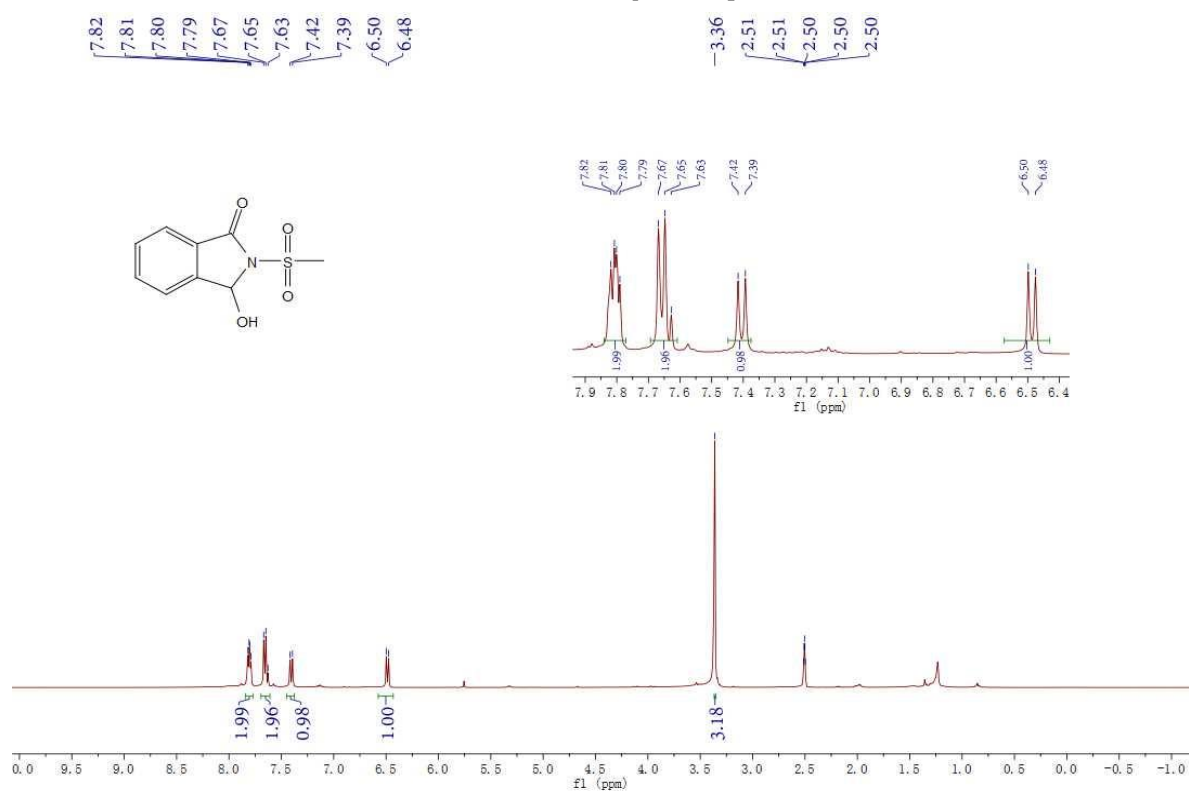

### <sup>13</sup>C NMR of compound 2p

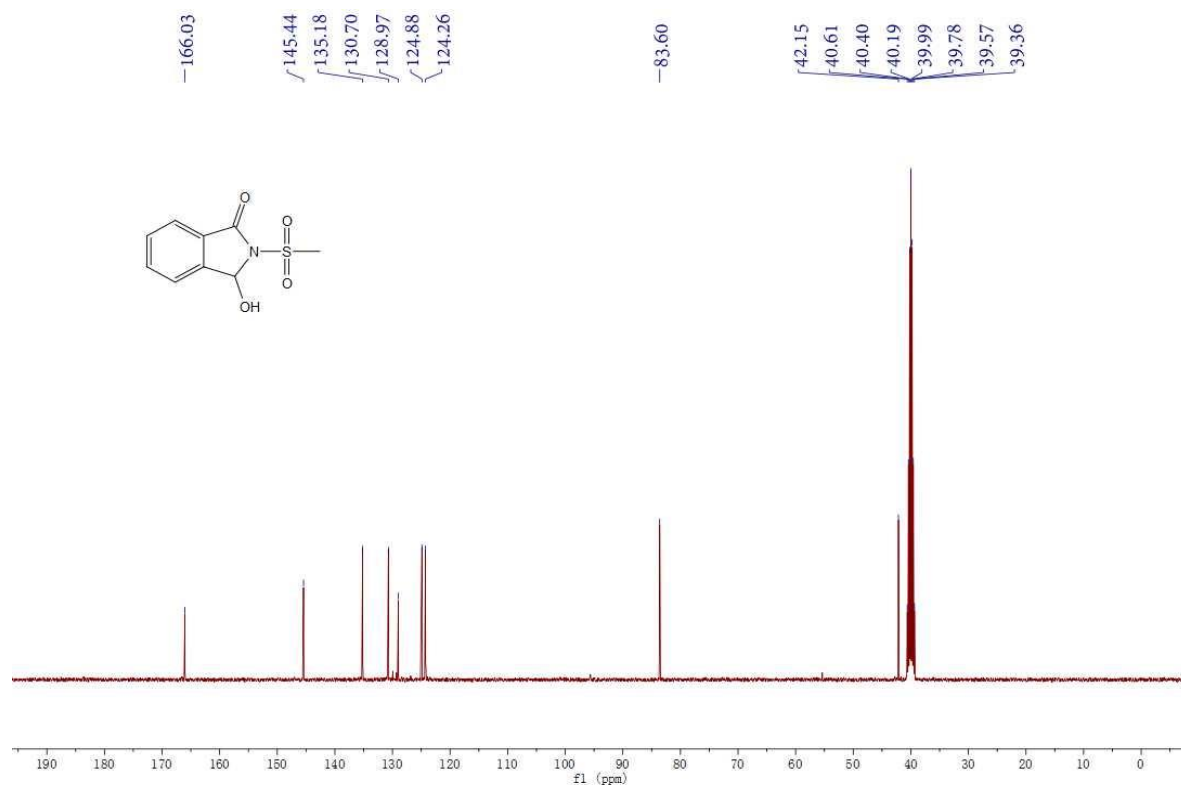

### <sup>1</sup>H NMR of compound 2q

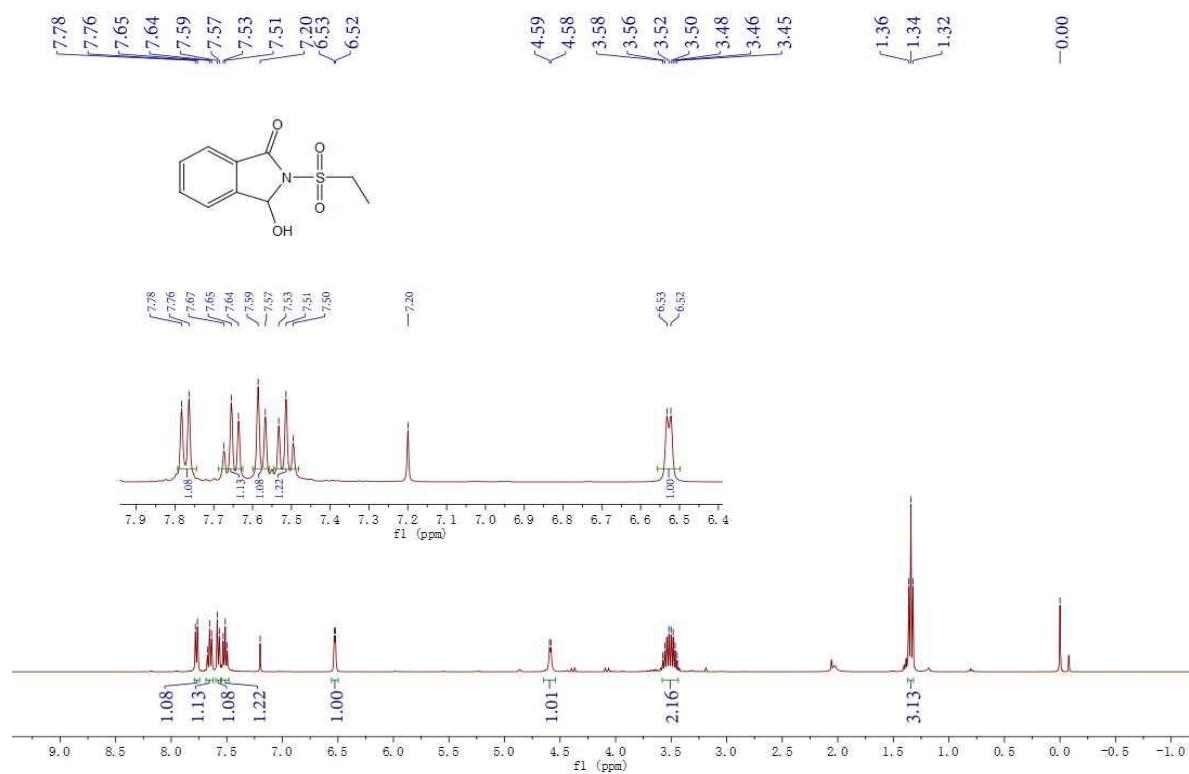

### <sup>13</sup>C NMR of compound 2q

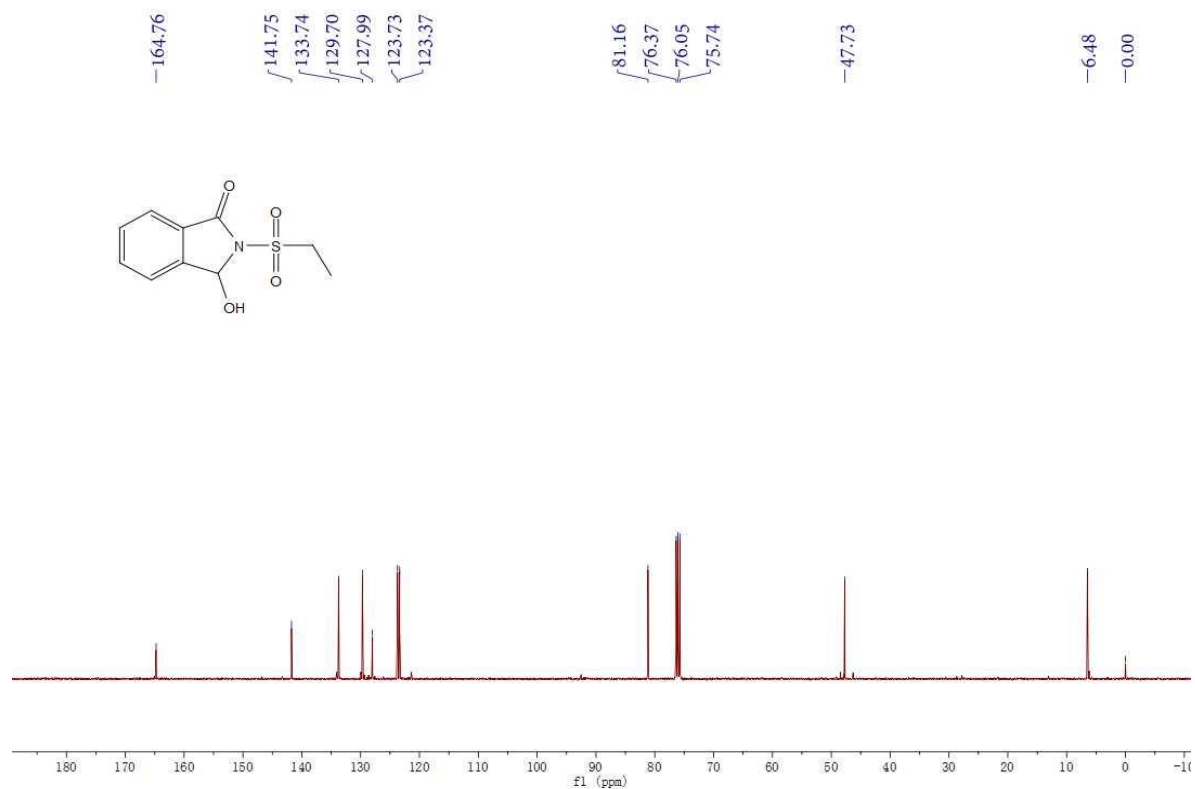

### <sup>1</sup>H NMR of compound 2r

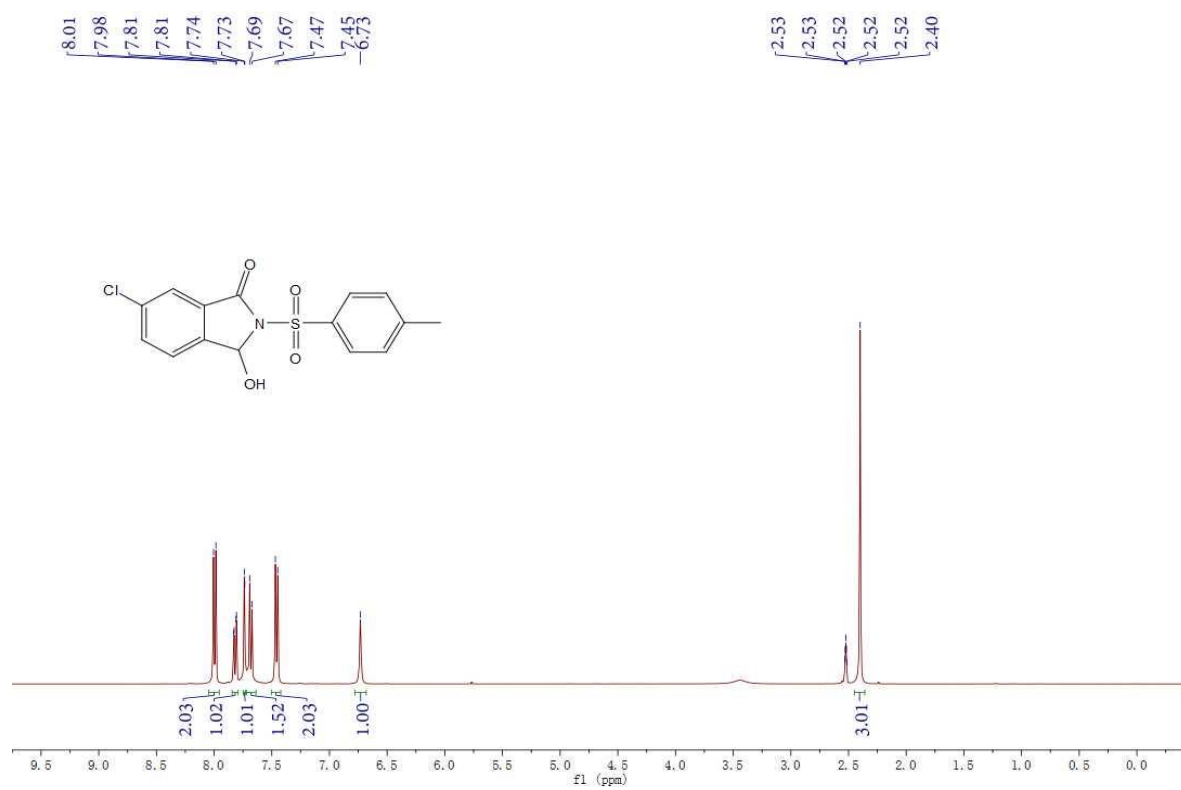

### <sup>13</sup>C NMR of compound 2r

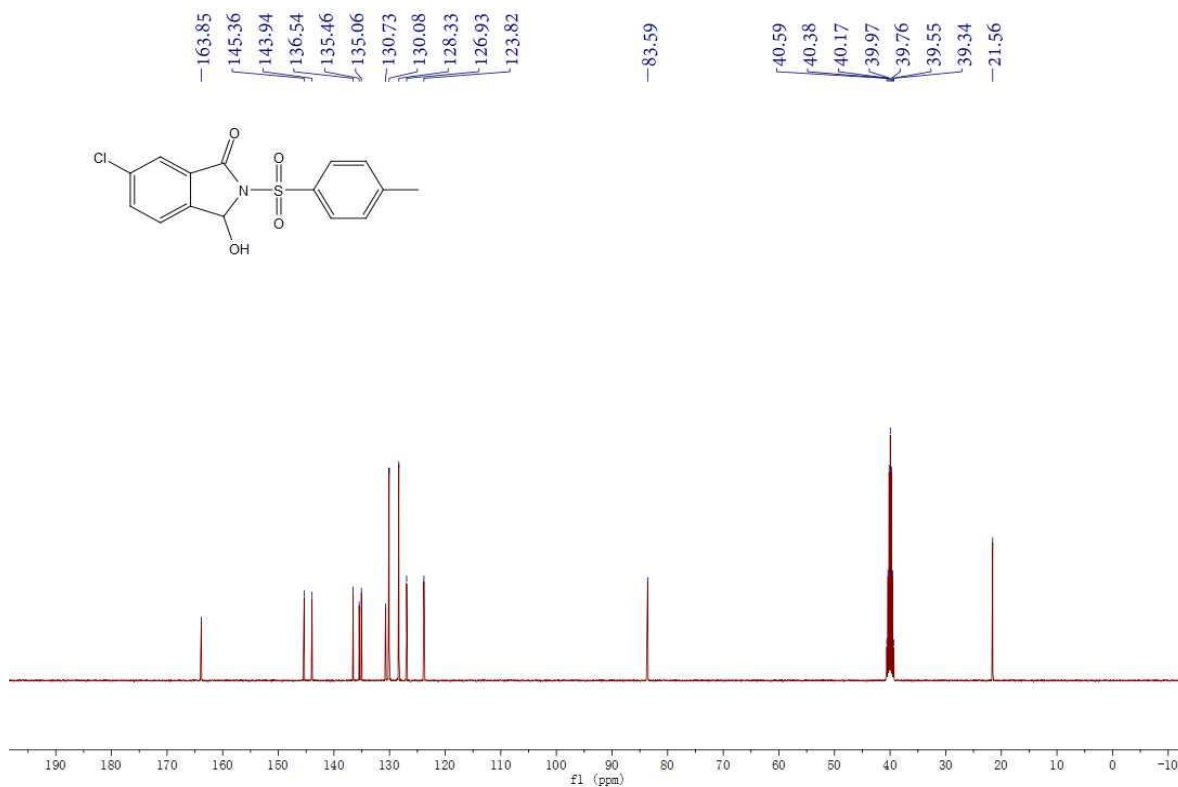

### <sup>1</sup>H NMR of compound 2s

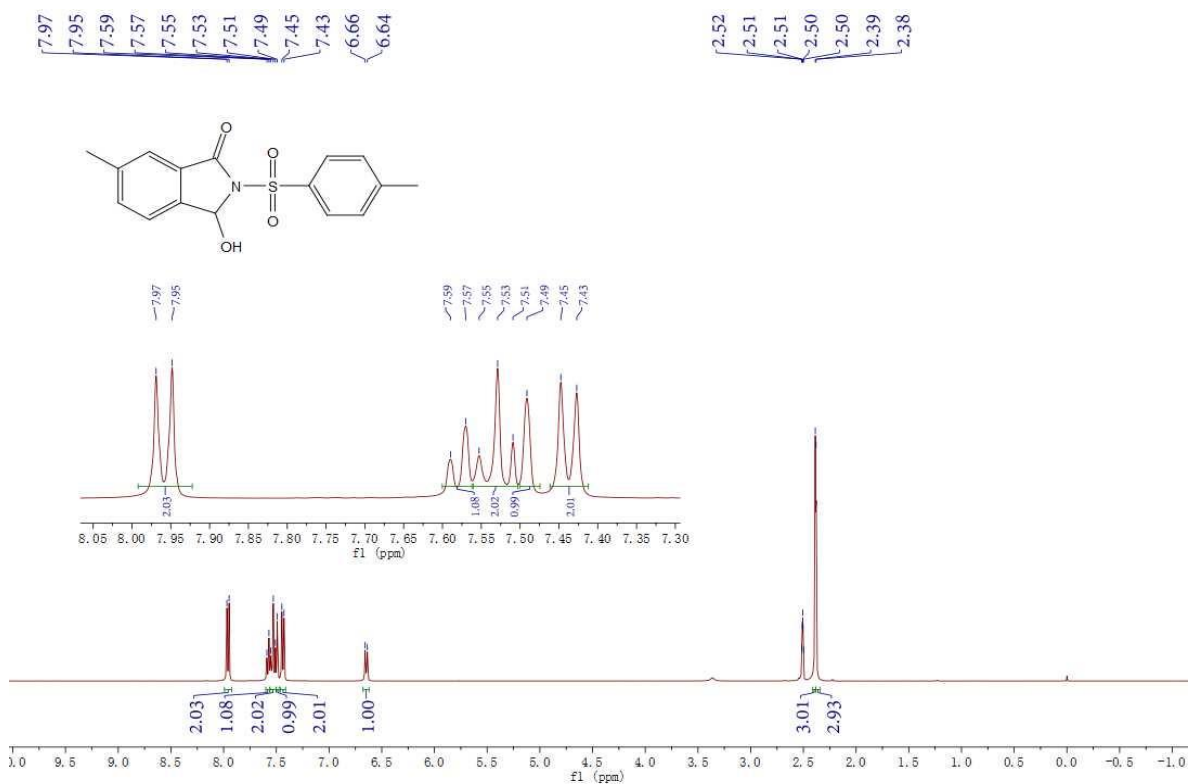

### <sup>13</sup>C NMR of compound 2s

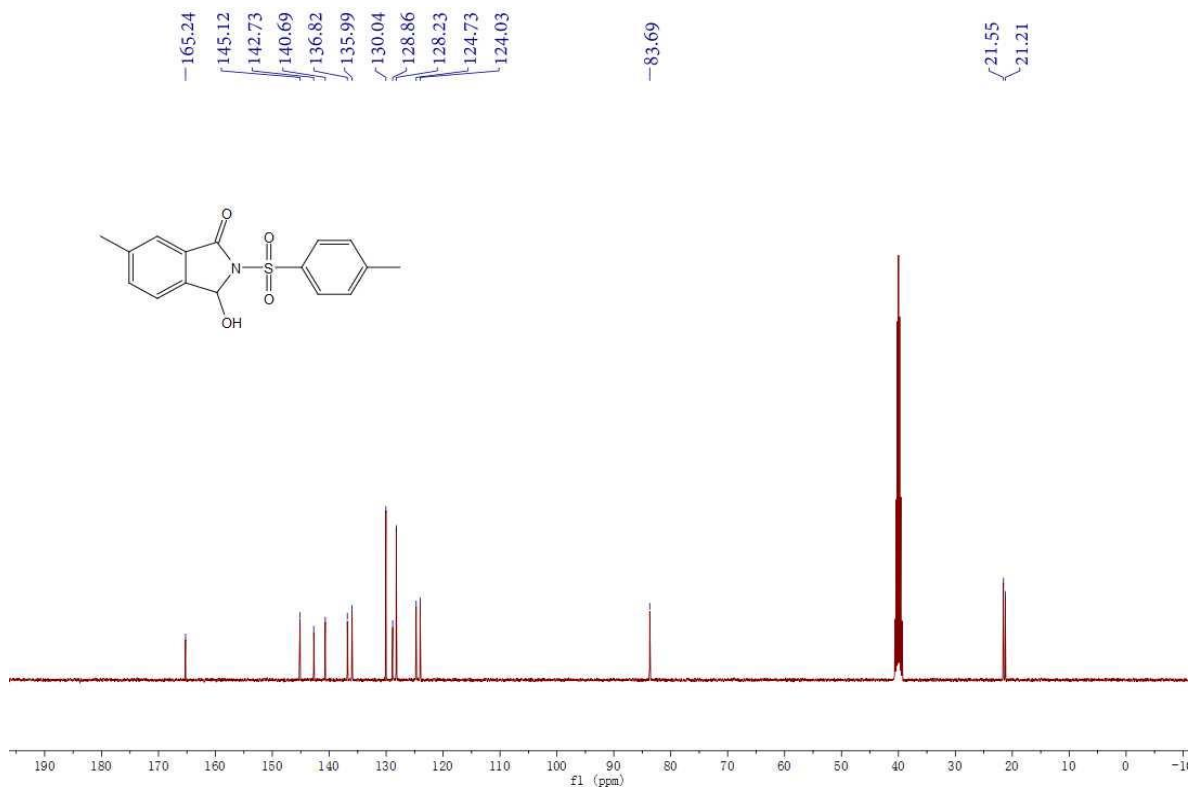

### <sup>1</sup>H NMR of compound 2t

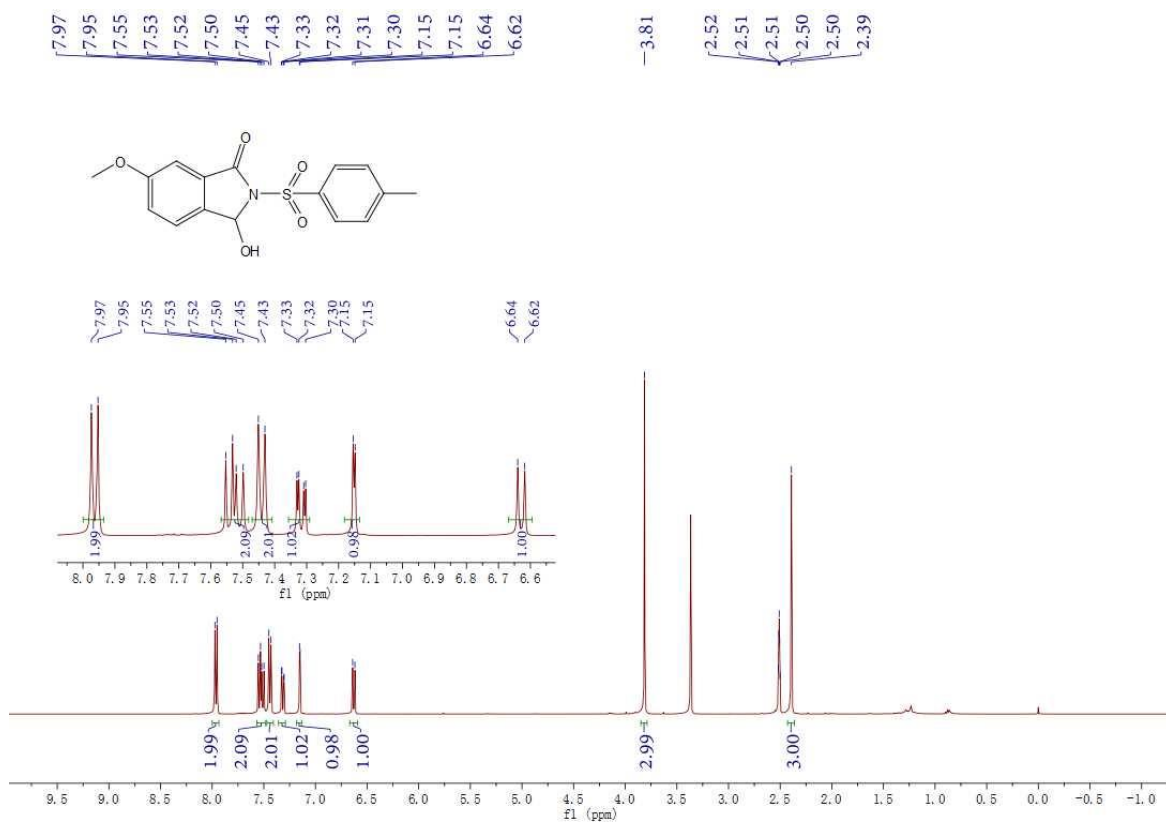

### <sup>13</sup>C NMR of compound 2t

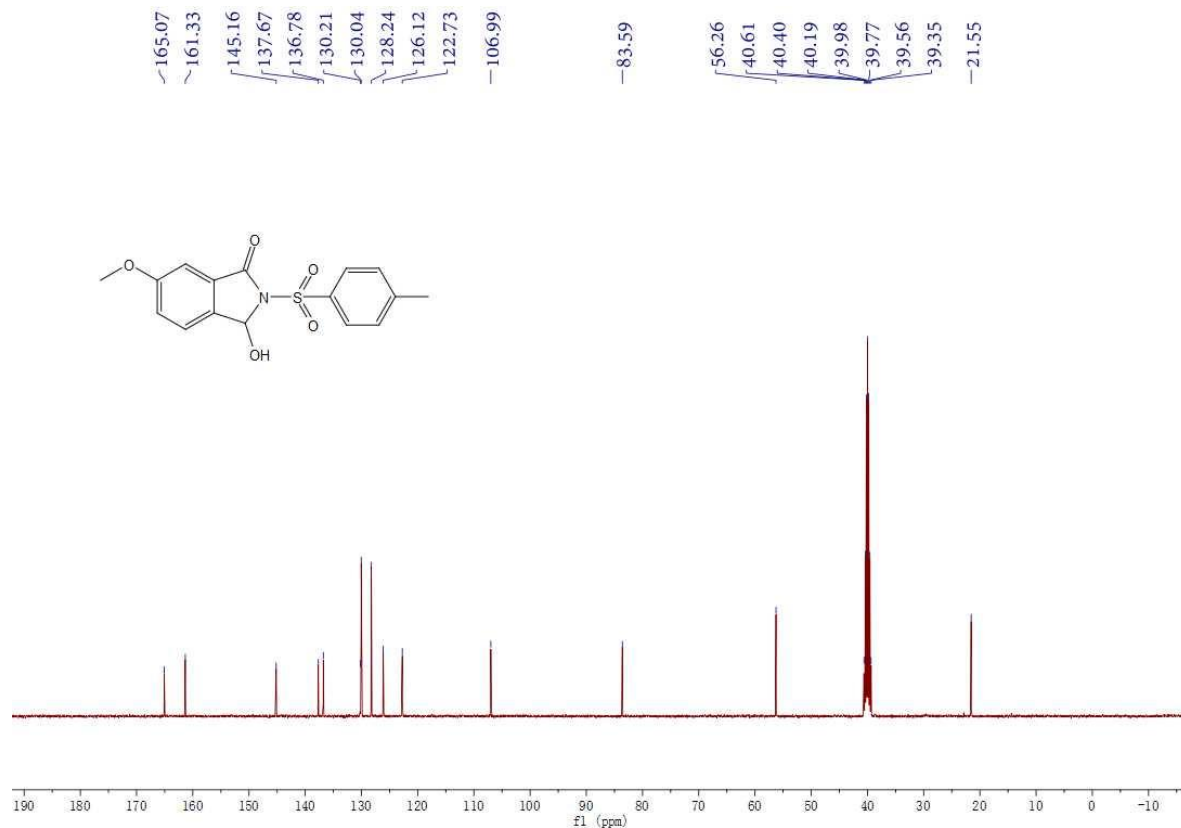

### <sup>1</sup>H NMR of compound 2u

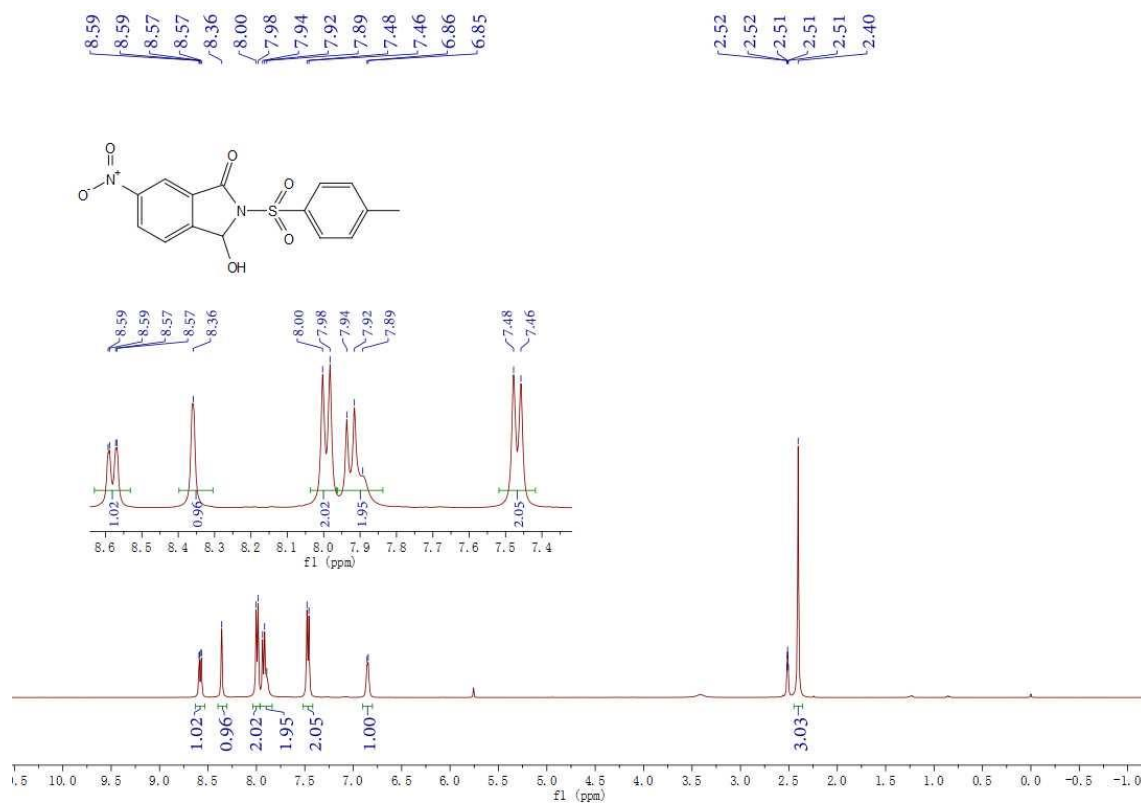



### <sup>13</sup>C NMR of compound 2u

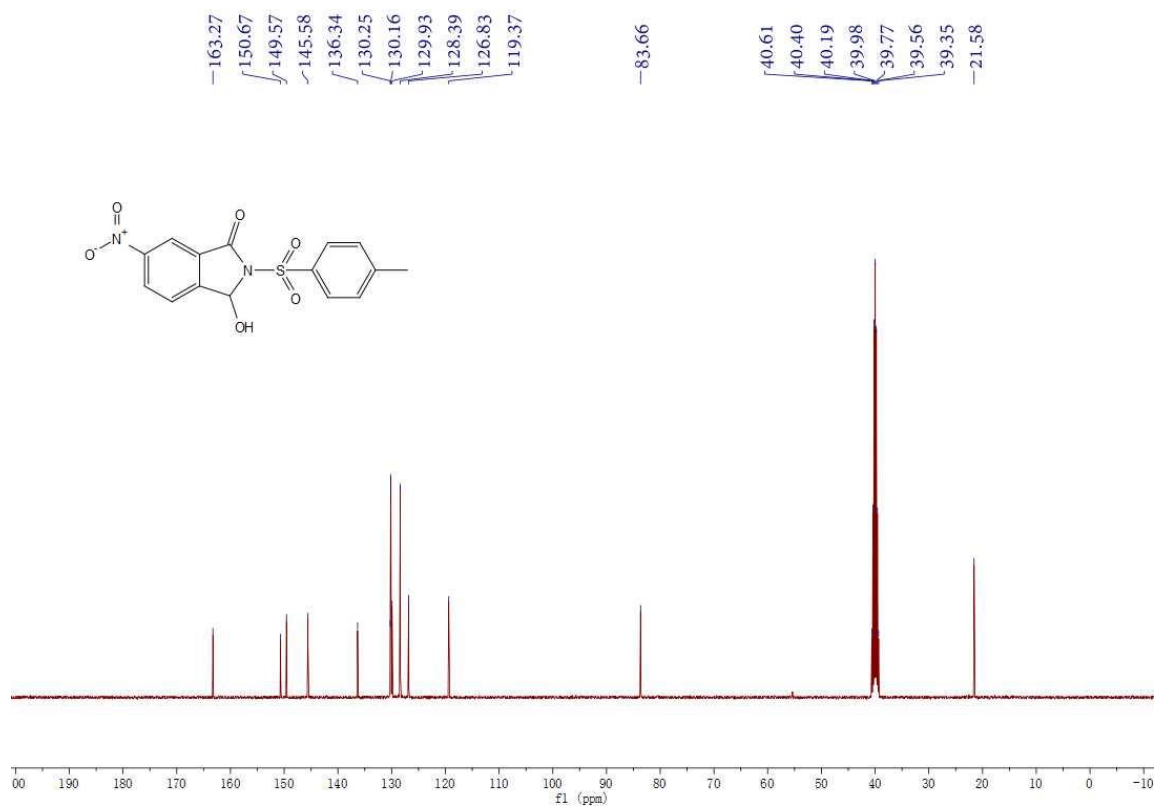

### <sup>1</sup>H NMR of compound 2v

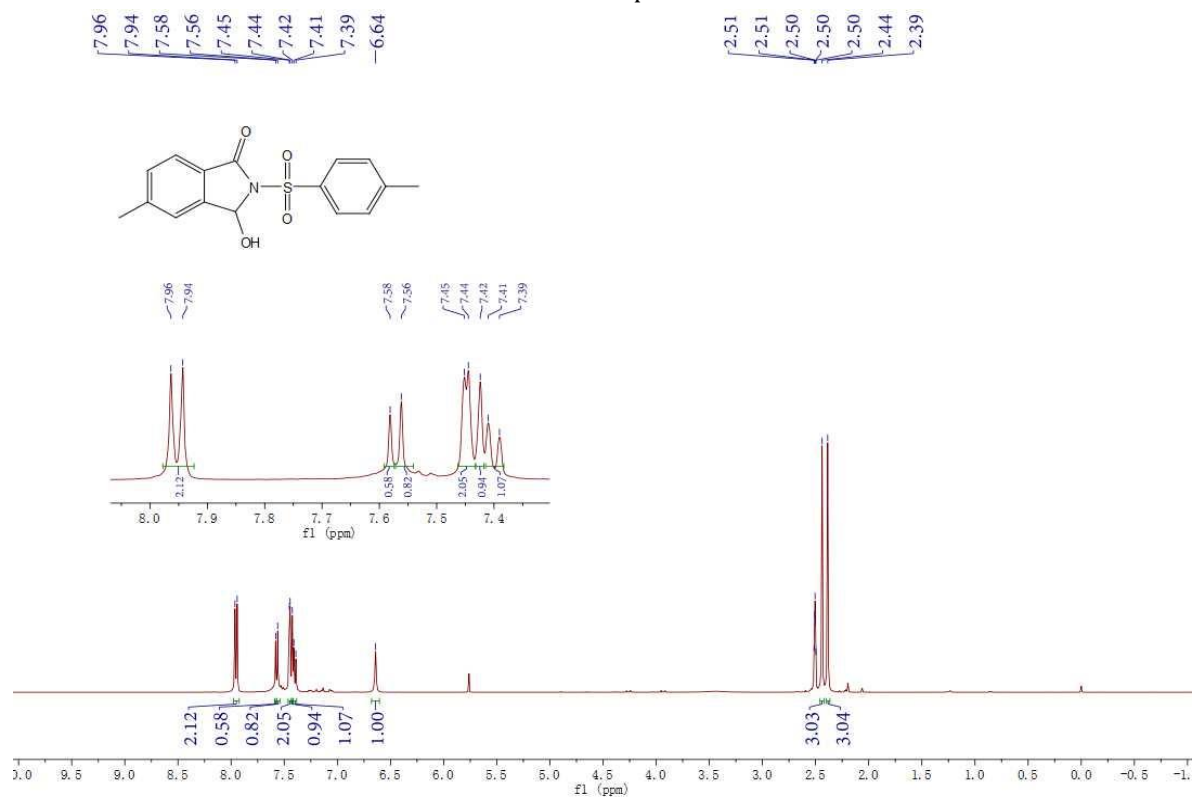

### <sup>13</sup>C NMR of compound 2v

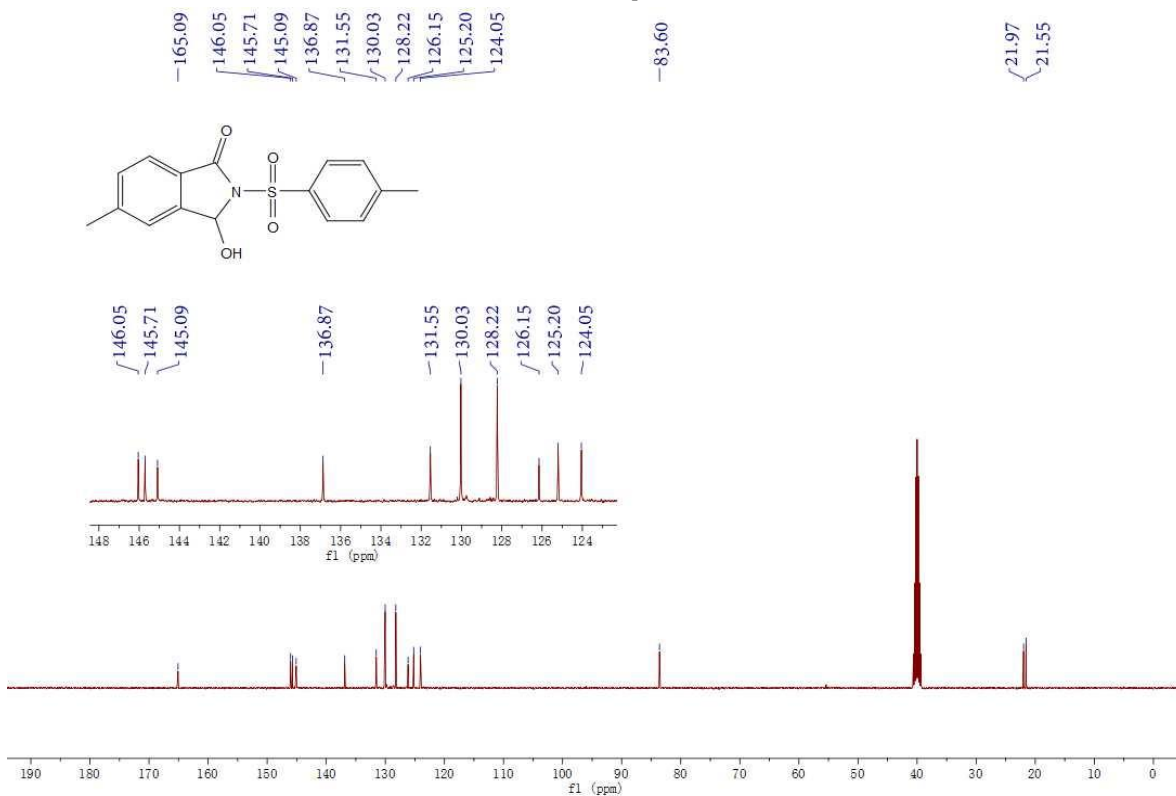

### <sup>1</sup>H NMR of compound 2w

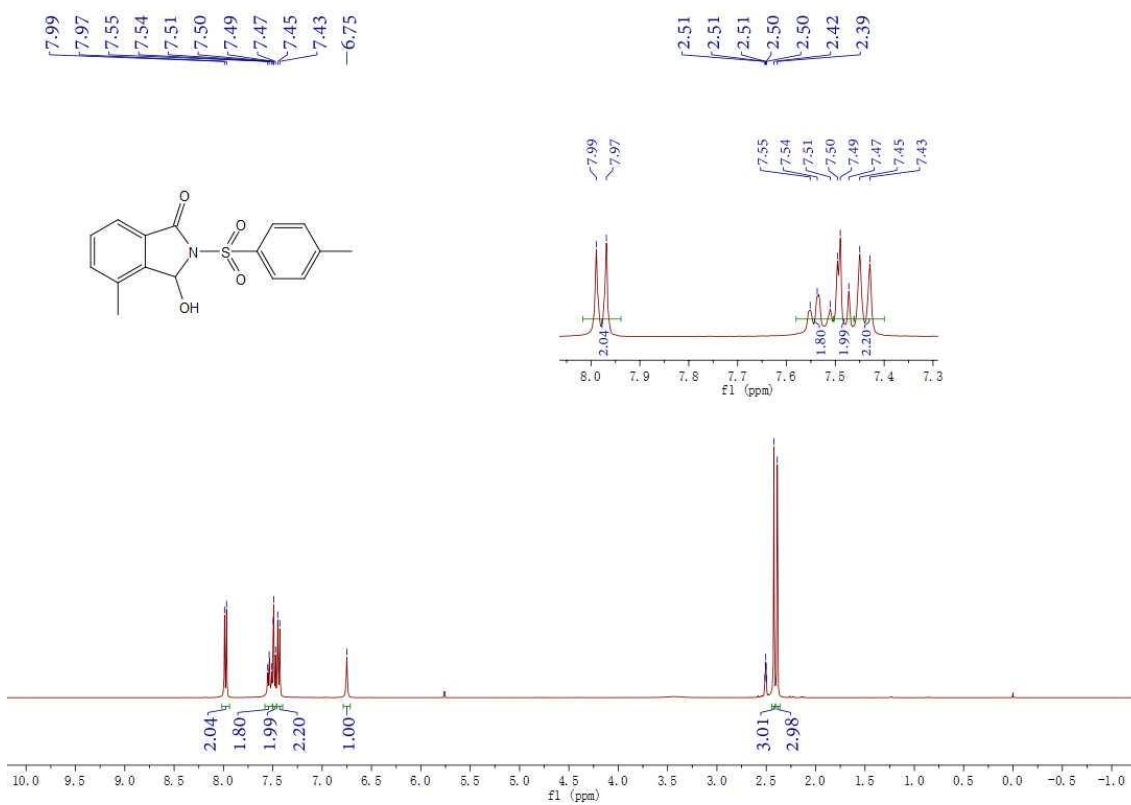

### <sup>13</sup>C NMR of compound 2w

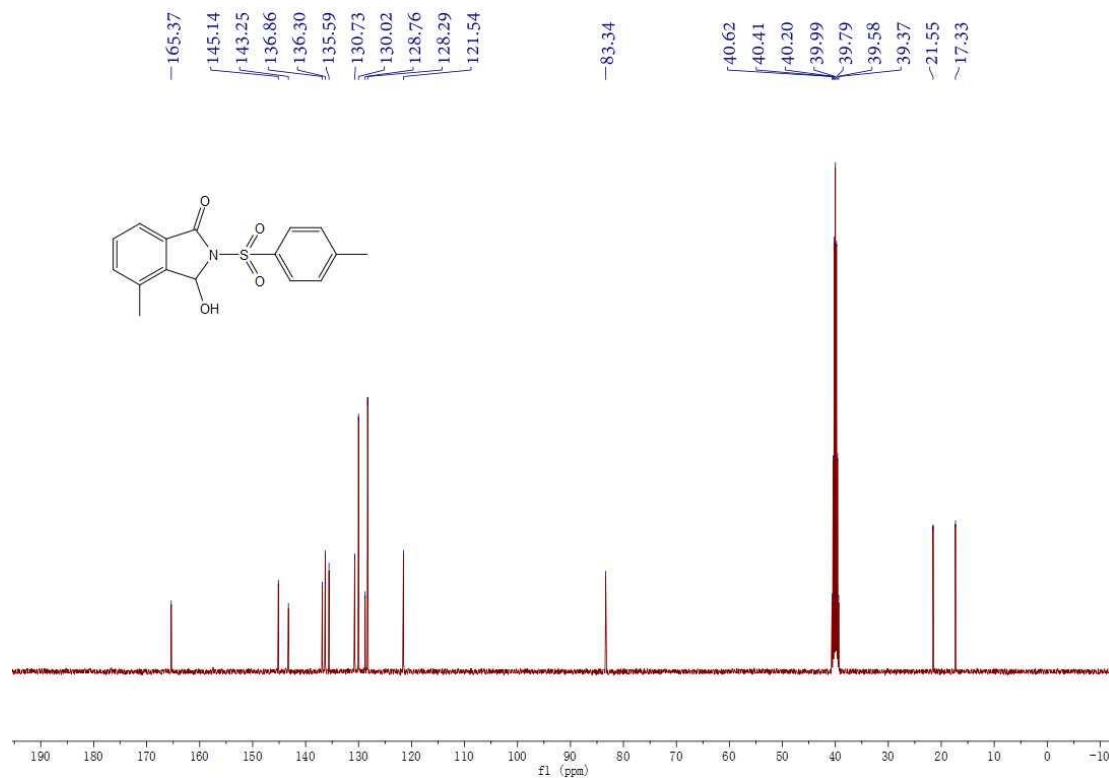

### <sup>1</sup>H NMR of compound 2x

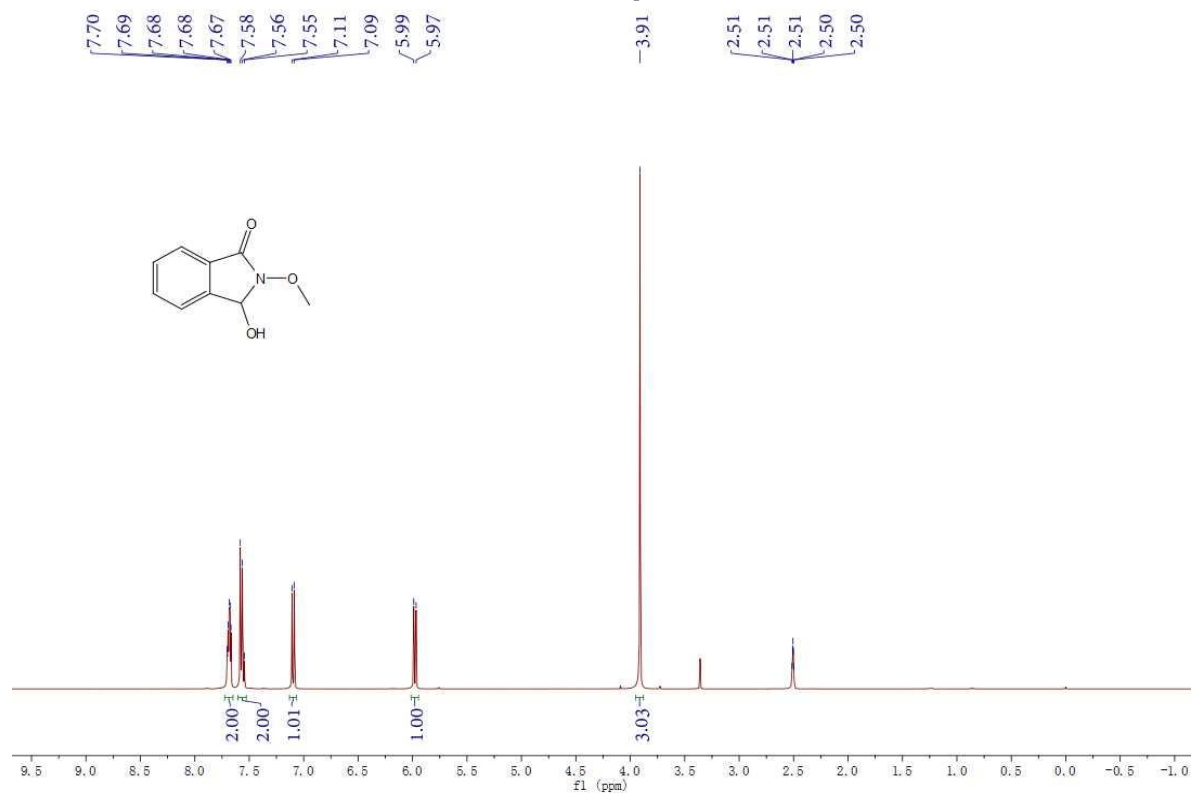

### <sup>13</sup>C NMR of compound 2x

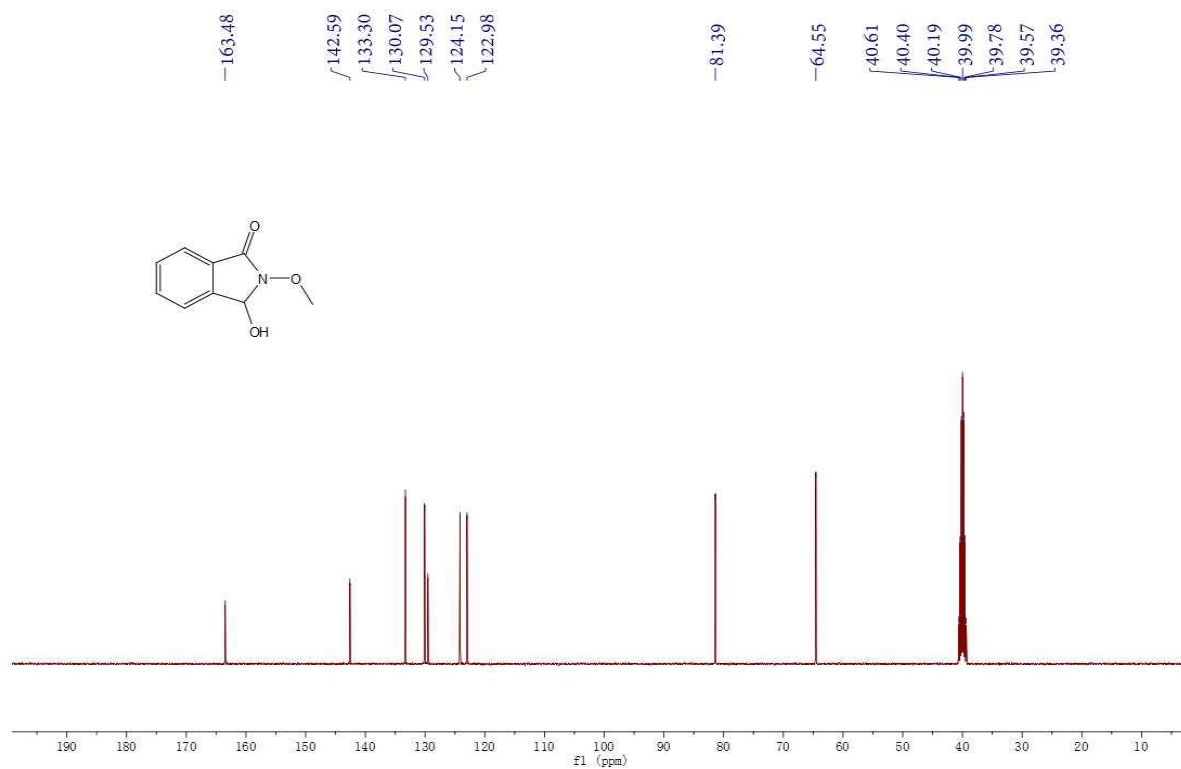

### <sup>1</sup>H NMR of compound 2y

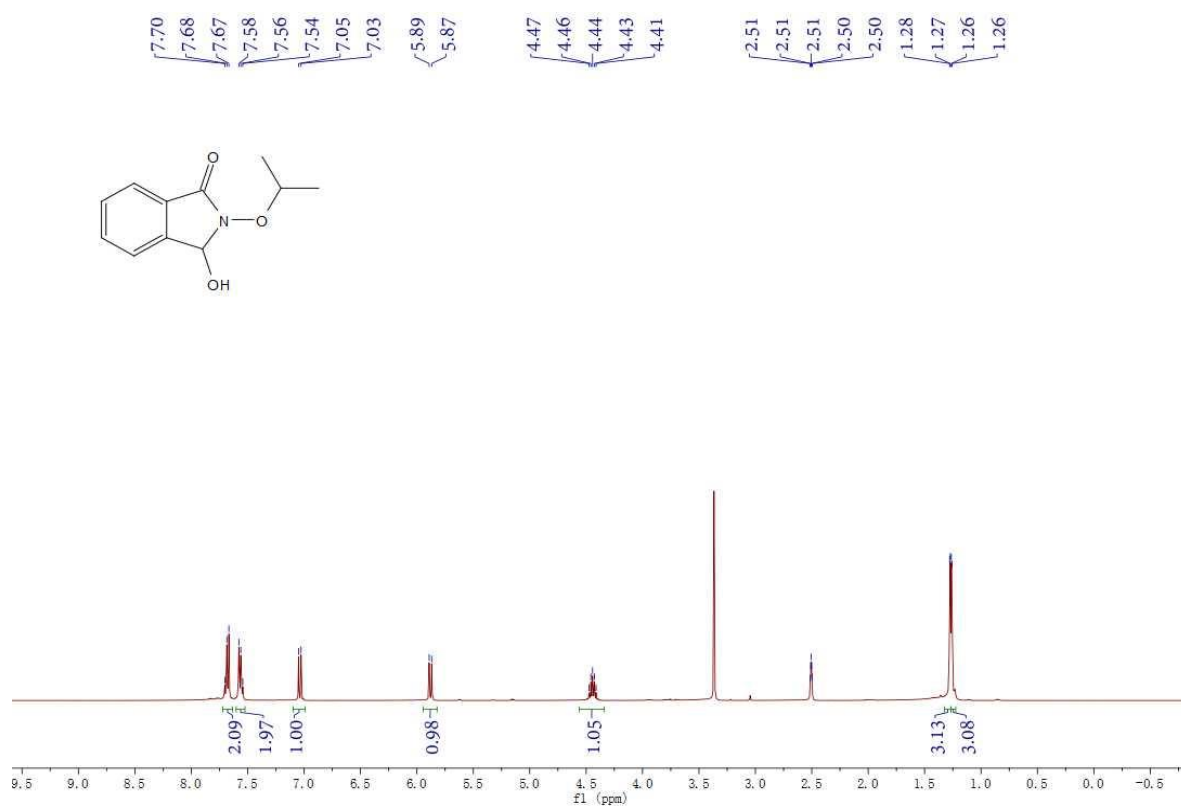

### <sup>13</sup>C NMR of compound 2y

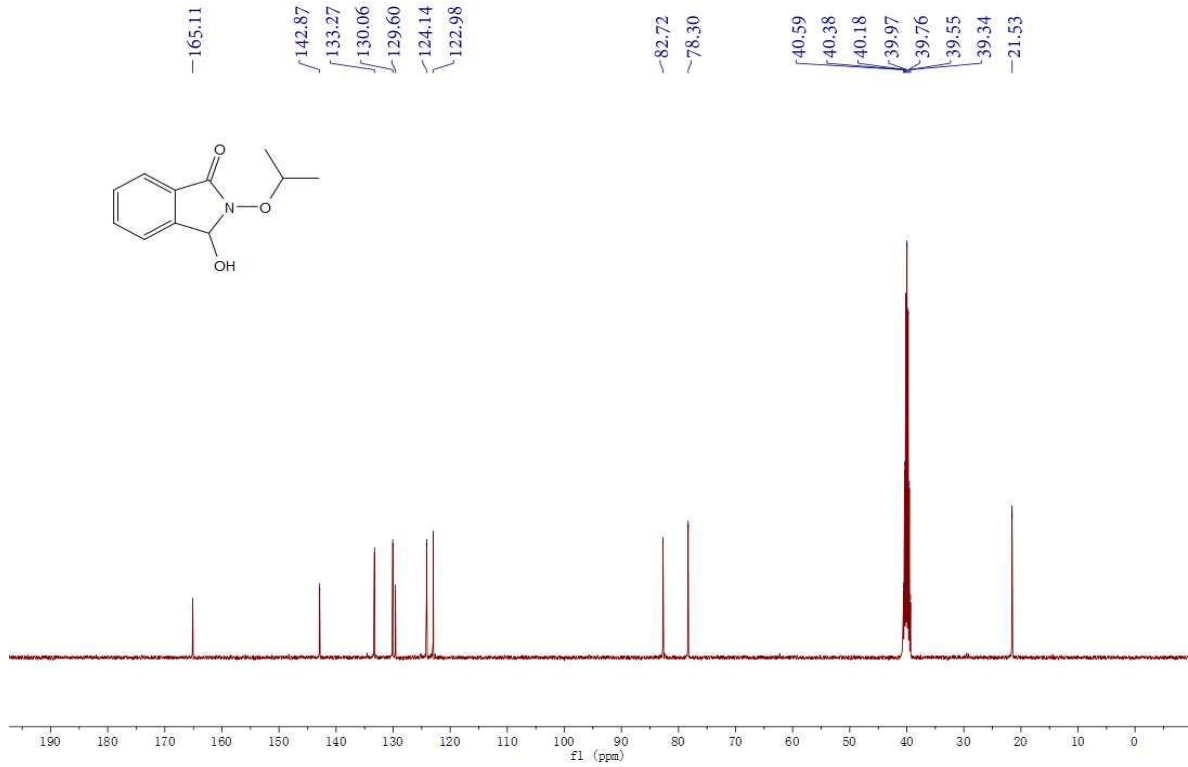

### <sup>1</sup>H NMR of compound 2z

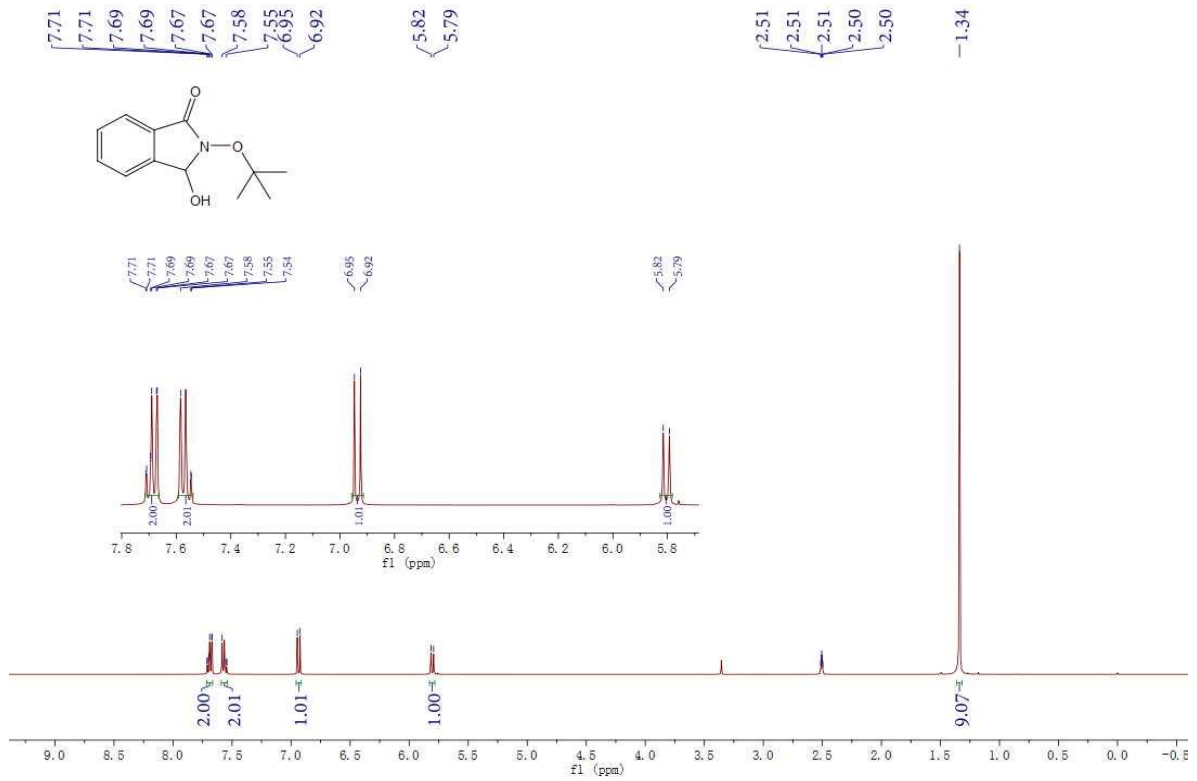

### <sup>13</sup>C NMR of compound **2z**

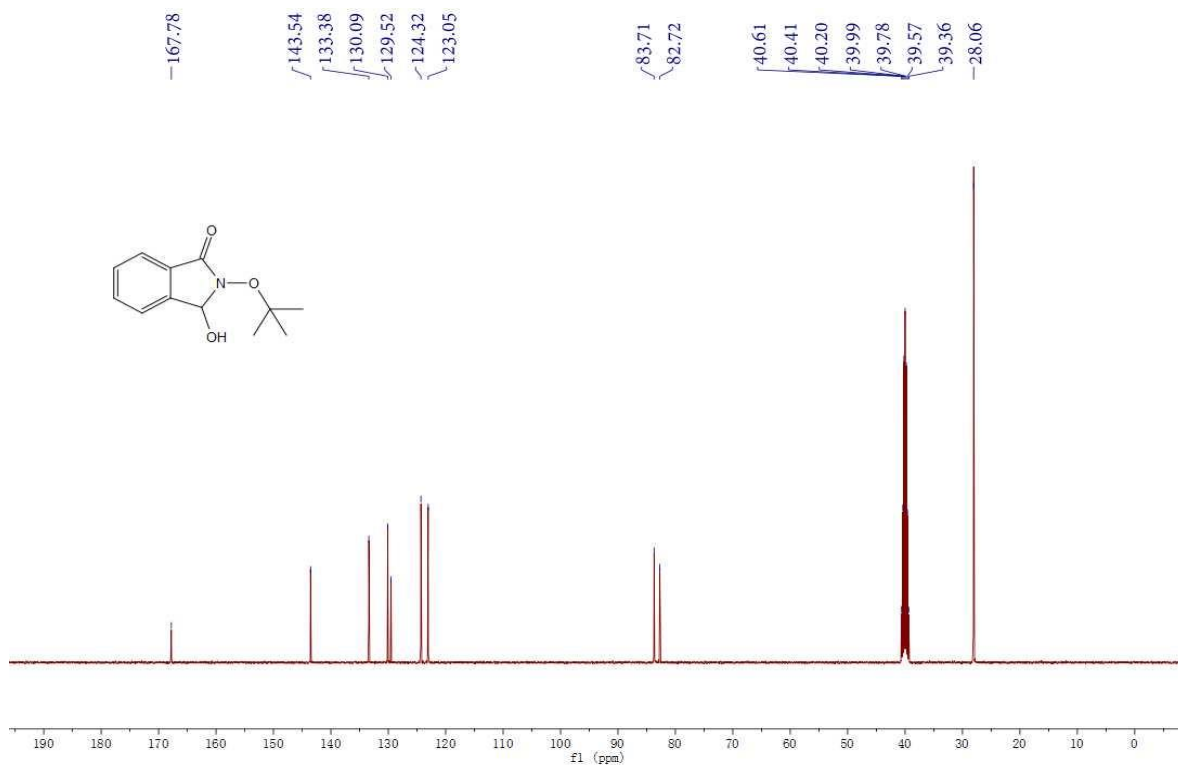

### <sup>1</sup>H NMR of compound **2aa**

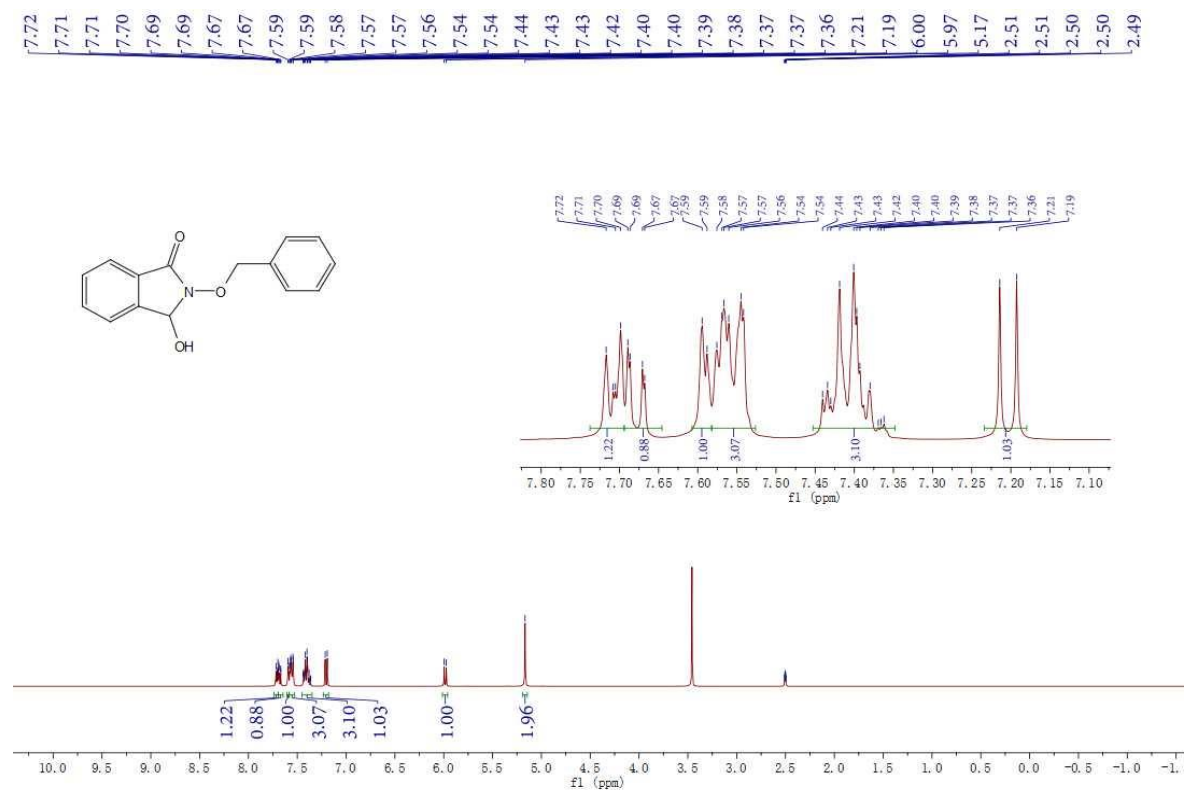

### <sup>13</sup>C NMR of compound 2aa

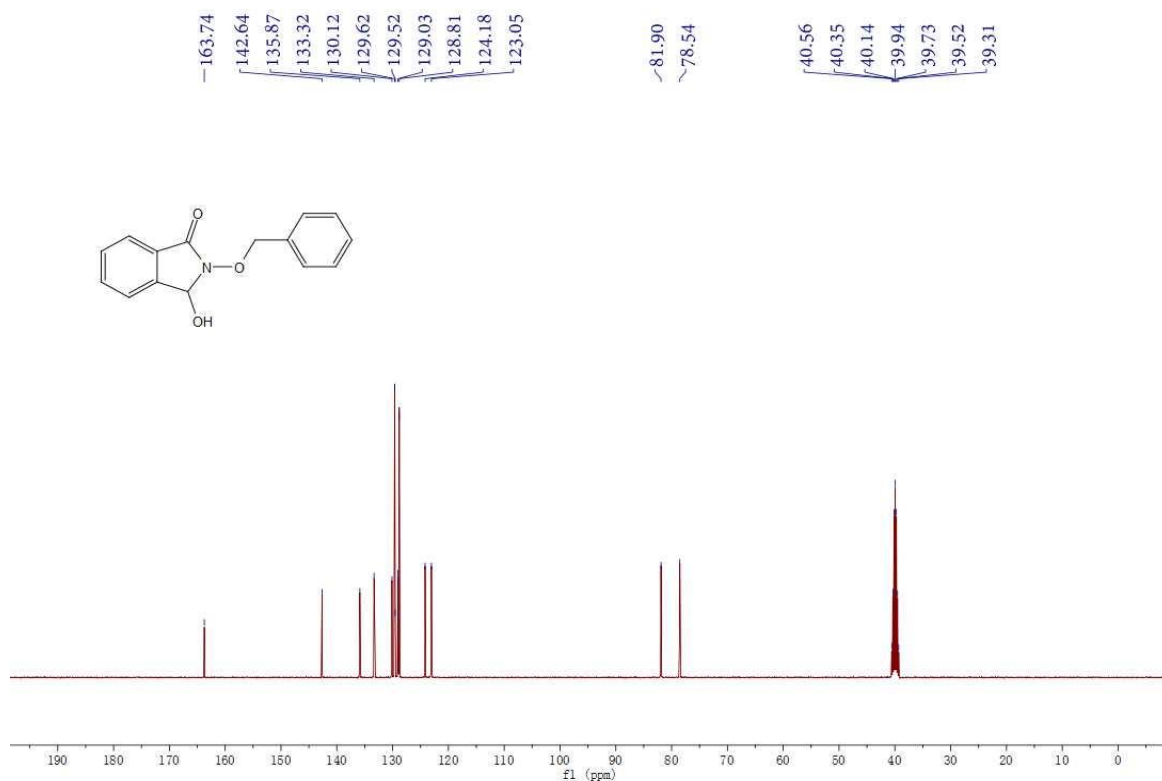

### <sup>1</sup>H NMR of compound 2ac

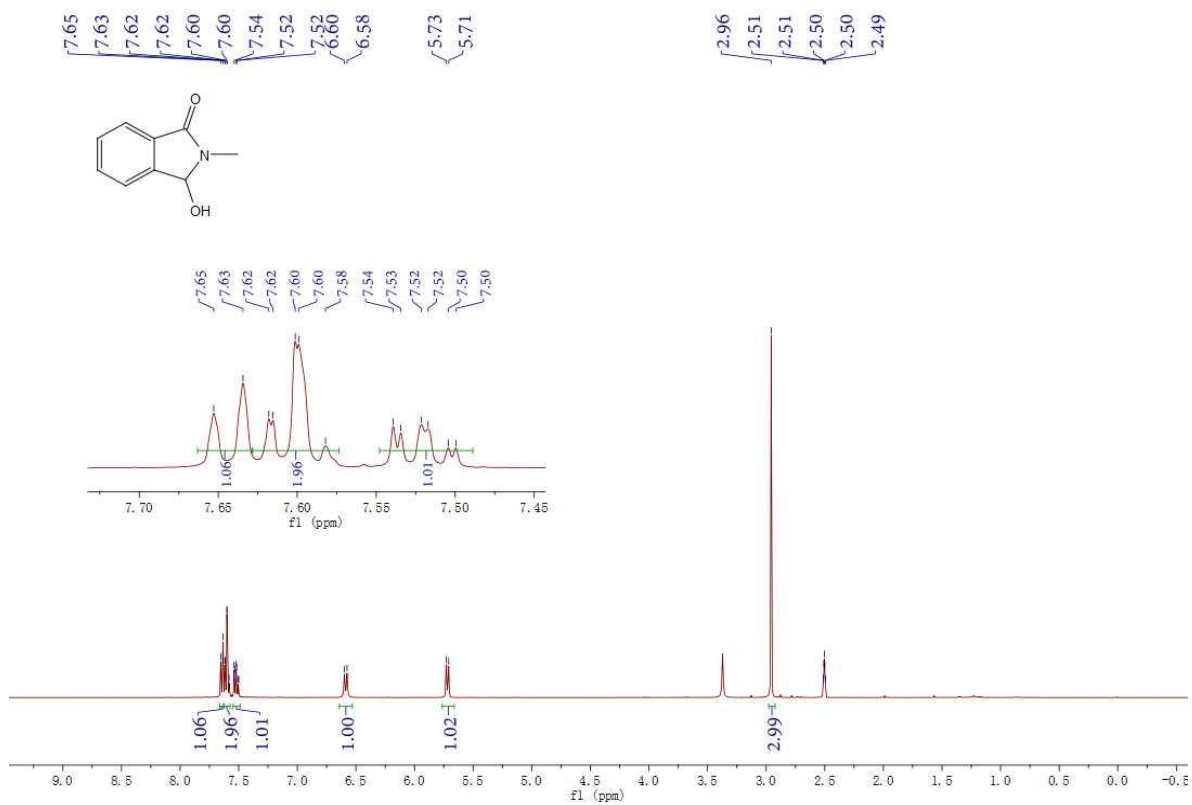





### <sup>13</sup>C NMR of compound 2ad

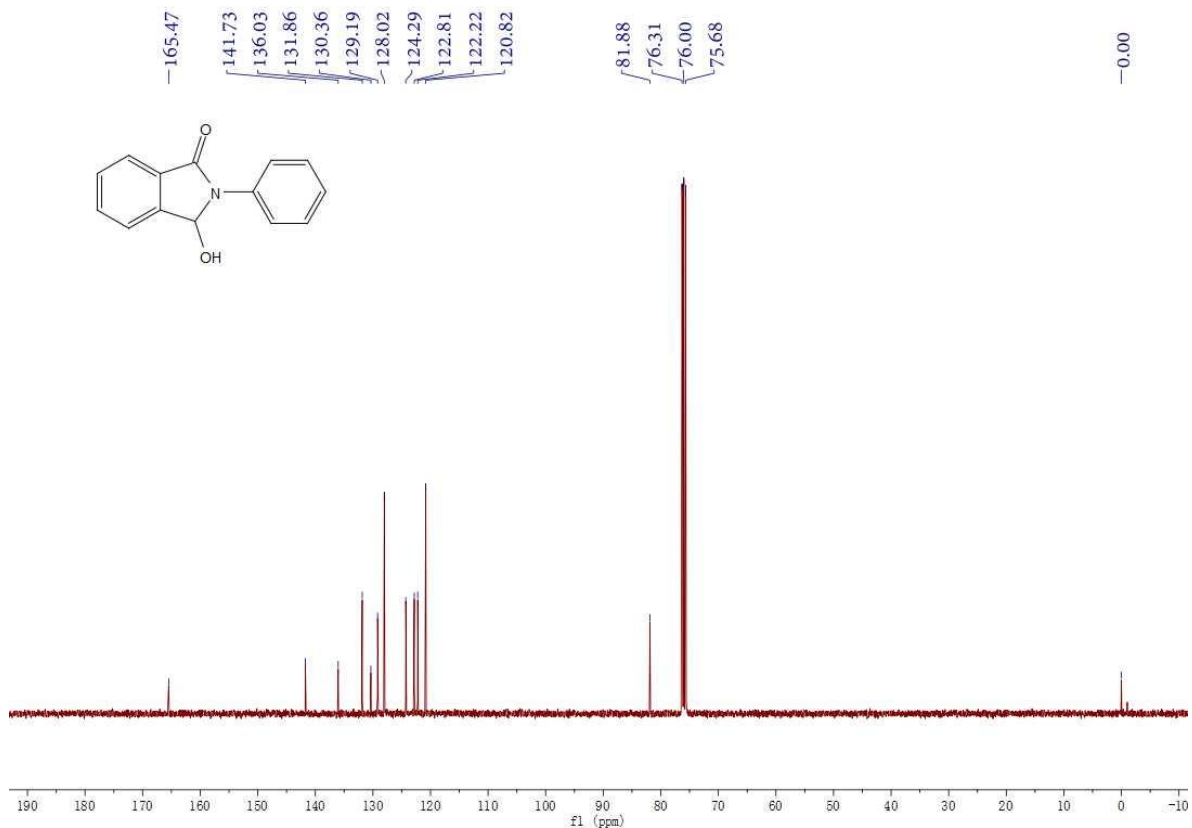

### <sup>1</sup>H NMR of compound 2ae

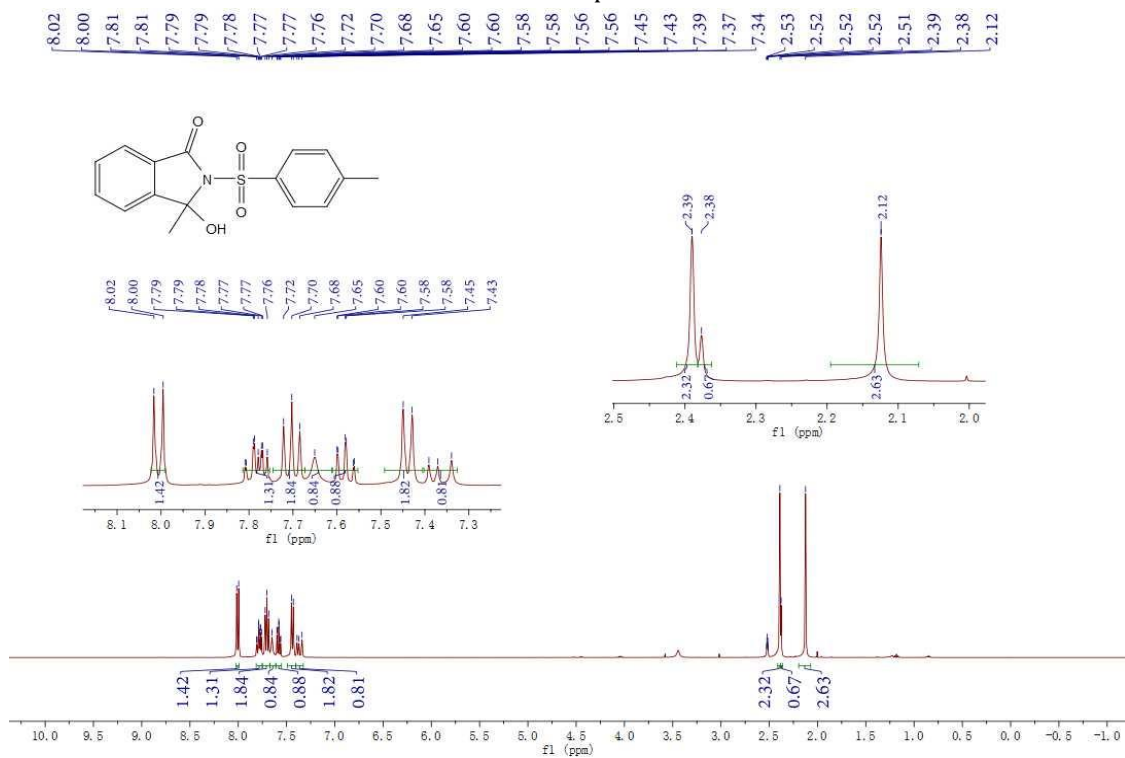

### <sup>13</sup>C NMR of compound 2ae

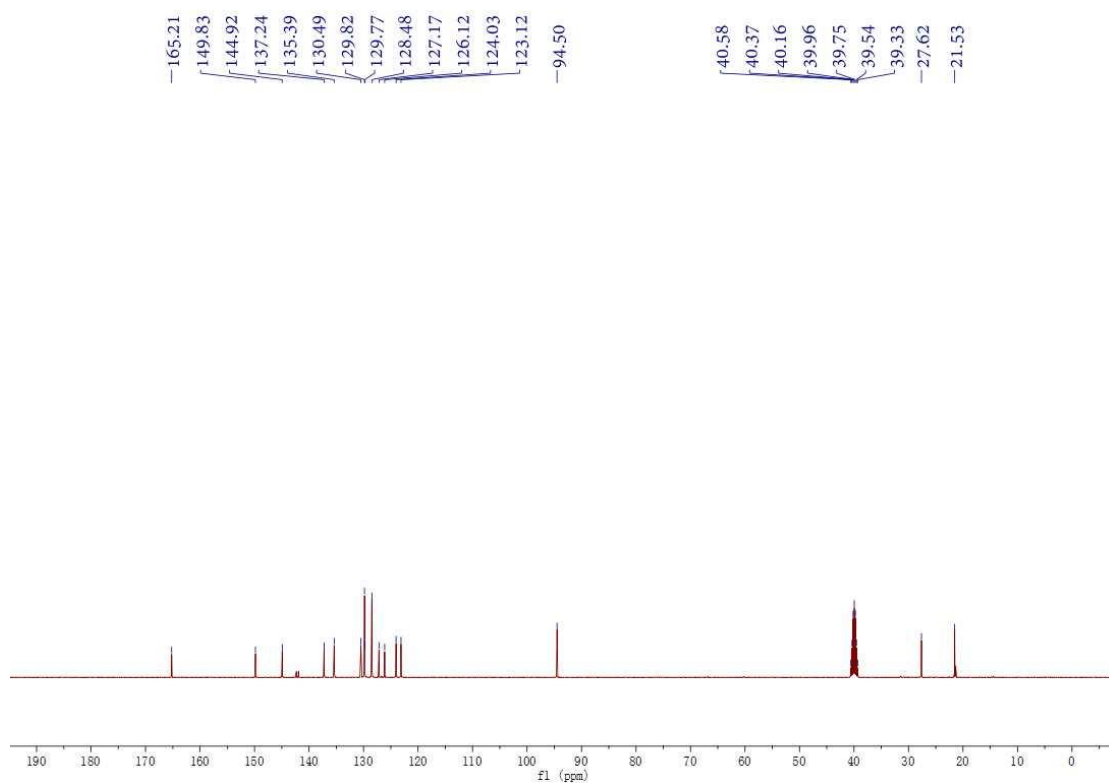

### <sup>1</sup>H NMR of compound 2af

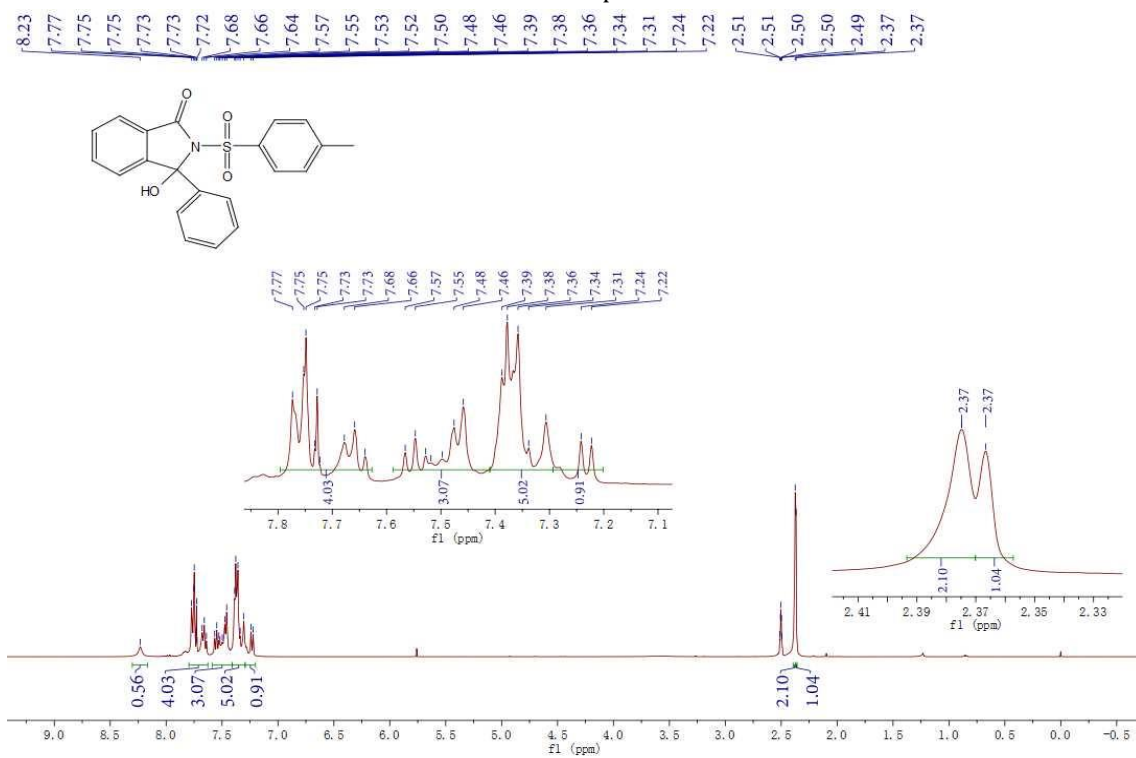

<sup>13</sup>C NMR of compound **2af**

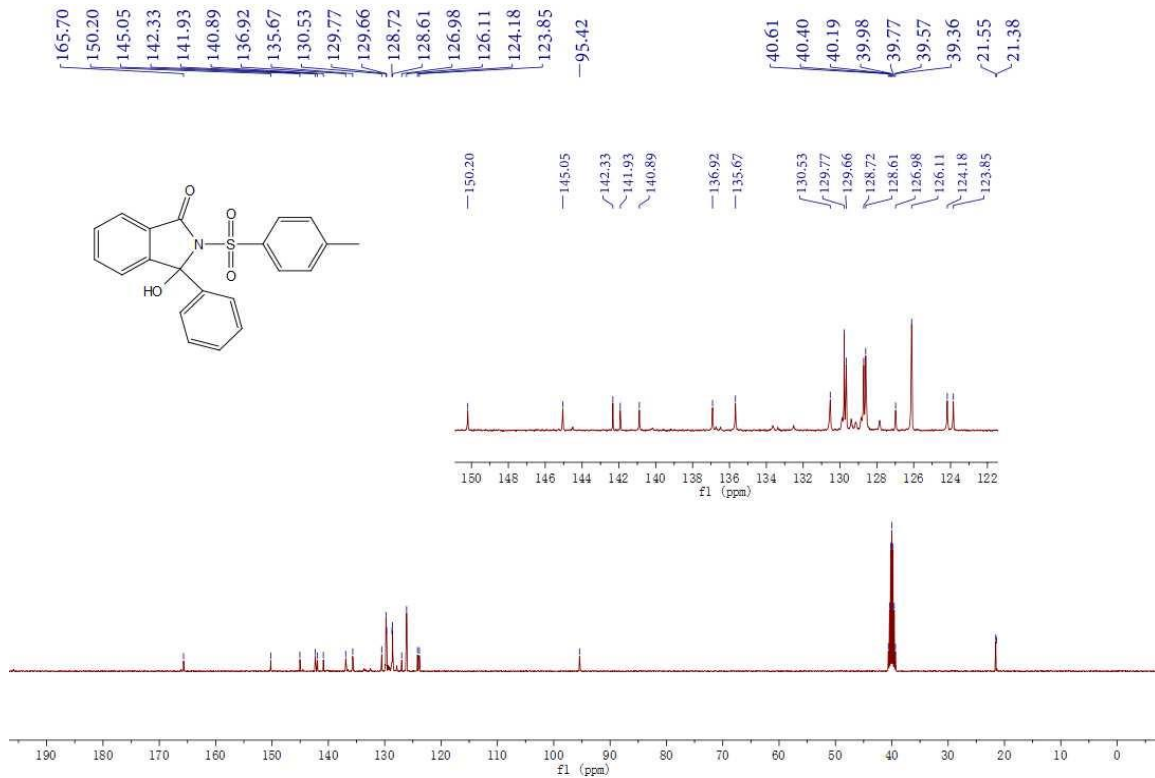

Supplement: d1qo01087e1.pdf [file d1qo01087e1.pdf]
